# Supplementary material for: The object space task shows cumulative memory expression in both mice and rats
Source: PLoS Biol. 2019 Jun 17;17(6):e3000322. doi: 10.1371/journal.pbio.3000322 (PMC6597117; doi:10.1371/journal.pbio.3000322)
Supplement: S2 Data — (XLSX) [file pbio.3000322.s005.xlsx]

## Sheet: Sheet1
condition	session	subject	trial	day	loc_1	loc_2	obj	loc_1_time	loc_2_time	total	start_time	comments	run_nr	originalnr	DI	loc_1_5	loc_2_5	total_5	DI_5	trial_wd
or	1	1	1	Mon	LL	UL	32	49.7223	67.3252	117.047			754		0.150392	49.7223	67.3252	117.047	0.150392	1
or	1	1	2	Mon	LL	LR	34	56.3106	53.4737	109.784			758		-0.025841	56.3106	53.4737	109.784	-0.025841	2
or	1	1	3	Mon	LL	UR	7	28.7647	37.8669	66.6316			762		0.136604	28.7647	37.8669	66.6316	0.136604	3
or	1	1	4	Mon	LL	UL	36	91.2172	84.0781	175.295			766		-0.0407264	91.2172	84.0781	175.295	-0.0407264	4
or	1	1	5	Mon	LL	LR	31	51.2693	40.572	91.8413			770		-0.116476	51.2693	40.572	91.8413	-0.116476	5
or	1	1	6	Tue	LL	UR	2	48.3334	15.5543	63.8876			794		-0.513074	48.3334	15.5543	63.8876	-0.513074	1
or	1	1	7	Tue	LL	LR	33	59.5913	54.4923	114.084			798		-0.0446945	59.5913	54.4923	114.084	-0.0446945	2
or	1	1	8	Tue	LL	UL	24	50.1899	31.8761	82.066			802		-0.223159	50.1899	31.8761	82.066	-0.223159	3
or	1	1	9	Tue	LL	UL	8	23.7827	15.064	38.8468			806		-0.224439	23.7827	15.064	38.8468	-0.224439	4
or	1	1	10	Tue	LL	LR	18	60.9983	105.251	166.249			810		0.266182	60.9983	105.251	166.249	0.266182	5
or	1	1	11	Wed	LL	LR	12	56.1737	76.8105	132.984			834		0.155182	56.1737	76.8105	132.984	0.155182	1
or	1	1	12	Wed	LL	UR	3	39.5366	50.6437	90.1803			838		0.123166	39.5366	50.6437	90.1803	0.123166	2
or	1	1	13	Wed	LL	UL	4	84.5318	92.702	177.234			842		0.0460981	84.5318	92.702	177.234	0.0460981	3
or	1	1	14	Wed	LL	LR	13	42.4827	49.0124	91.495			846		0.0713671	42.4827	49.0124	91.495	0.0713671	4
or	1	1	15	Wed	LL	UL	9	130.514	30.5507	161.065			850		-0.620641	130.514	30.5507	161.065	-0.620641	5
or	1	1	16	Thu	LL	UL	40	38.1254	30.3563	68.4816			874		-0.113448	38.1254	30.3563	68.4816	-0.113448	1
or	1	1	17	Thu	LL	LR	19	92.659	69.8491	162.508			878		-0.140362	92.659	69.8491	162.508	-0.140362	2
or	1	1	18	Thu	LL	LR	26	87.6269	83.8066	171.433			882		-0.0222848	87.6269	83.8066	171.433	-0.0222848	3
or	1	1	19	Thu	LL	UL	38	137.749	52.1661	189.916			886		-0.450639	137.749	52.1661	189.916	-0.450639	4
or	1	1	20	Thu	LL	UR	41	44.5916	69.2582	113.85			890		0.216659	44.5916	69.2582	113.85	0.216659	5
or	1	1	21	Fri	LL	UR	14	142.735	111.767	254.502			914		-0.12168	73.299	72.1334	145.432	-0.00801532	1
od	2	1	1	Mon	LR	UL	25	47.5953	63.1303	110.726			922		0.140302	47.5953	63.1303	110.726	0.140302	1
od	2	1	2	Mon	LR	UL	20	50.7423	60.4515	111.194			926		0.0873183	50.7423	60.4515	111.194	0.0873183	2
od	2	1	3	Mon	LR	UL	5	49.7356	136.218	185.953			930		0.465075	49.7356	136.218	185.953	0.465075	3
od	2	1	4	Mon	LR	UL	29	49.0254	47.2904	96.3157			934		-0.0180135	49.0254	47.2904	96.3157	-0.0180135	4
od	2	1	5	Mon	LR	UL	10	51.5581	90.0556	141.614			938		0.271848	51.5581	90.0556	141.614	0.271848	5
od	2	1	6	Tue	LR	UL	17	24.8231	56.9288	81.7519			962		0.392721	24.8231	56.9288	81.7519	0.392721	1
od	2	1	7	Tue	LR	UL	37	108.495	109.667	218.162			966		0.00537145	108.495	109.667	218.162	0.00537145	2
od	2	1	8	Tue	LR	UL	35	91.014	178.543	269.557			970		0.324715	91.014	178.543	269.557	0.324715	3
od	2	1	9	Tue	LR	UL	6	71.5882	59.9505	131.539			974		-0.0884732	71.5882	59.9505	131.539	-0.0884732	4
od	2	1	10	Tue	LR	UL	16	81.635	71.9883	153.623			978		-0.0627946	81.635	71.9883	153.623	-0.0627946	5
od	2	1	11	Wed	LR	UL	11	49.2758	32.495	81.7708			1002		-0.205217	49.2758	32.495	81.7708	-0.205217	1
od	2	1	12	Wed	LR	UL	22	153.021	47.3427	200.363			1006		-0.527431	153.021	47.3427	200.363	-0.527431	2
od	2	1	13	Wed	LR	UL	24	96.6298	62.7158	159.346			1010		-0.212833	96.6298	62.7158	159.346	-0.212833	3
od	2	1	14	Wed	LR	UL	9	109.331	97.6411	206.972			1014		-0.05648	109.331	97.6411	206.972	-0.05648	4
od	2	1	15	Wed	LR	UL	39	0	0	0		mirrored	408			0	0	0	0	5
od	2	1	16	Thu	LR	UL	15	46.3866	61.5438	107.93			1042		0.140435	46.3866	61.5438	107.93	0.140435	1
od	2	1	17	Thu	LR	UL	4	92.7288	84.2032	176.932			1046		-0.0481854	92.7288	84.2032	176.932	-0.0481854	2
od	2	1	18	Thu	LR	UL	12	59.1755	94.7699	153.945			1050		0.231214	59.1755	94.7699	153.945	0.231214	3
od	2	1	19	Thu	LR	UL	30	117.039	71.9845	189.023			1054		-0.238353	117.039	71.9845	189.023	-0.238353	4
od	2	1	20	Thu	LR	UL	38	71.3296	67.7315	139.061			1058		-0.025874	71.3296	67.7315	139.061	-0.025874	5
od	2	1	21	Fri	LR	LL	40	85.1579	113.749	198.907			1082		0.143741	24.6121	60.8519	85.464	0.424035	1
con	3	1	1	Mon	LL	UR	36	79.9817	62.3068	142.288			1090		-0.124219	79.9817	62.3068	142.288	-0.124219	1
con	3	1	2	Mon	UL	UR	16	83.2198	88.3069	171.527			1094		0.0296577	83.2198	88.3069	171.527	0.0296577	2
con	3	1	3	Mon	LR	UR	21	59.9882	36.1863	96.1744			1098		-0.247487	59.9882	36.1863	96.1744	-0.247487	3
con	3	1	4	Mon	LL	UL	39	48.8237	63.0399	111.864			1102		0.127084	48.8237	63.0399	111.864	0.127084	4
con	3	1	5	Mon	UR	LR	6	71.3499	58.2692	129.619			1106		-0.100916	71.3499	58.2692	129.619	-0.100916	5
con	3	1	6	Tue	UL	LR	11	25.6789	27.7227	53.4016			1130		0.0382723	25.6789	27.7227	53.4016	0.0382723	1
con	3	1	7	Tue	UL	LL	34	42.3964	34.1437	76.5401			1134		-0.107821	42.3964	34.1437	76.5401	-0.107821	2
con	3	1	8	Tue	LL	LR	2	40.1666	34.5129	74.6795			1138		-0.0757069	40.1666	34.5129	74.6795	-0.0757069	3
con	3	1	9	Tue	LR	UL	32	70.5476	98.8089	169.356			1142		0.166875	70.5476	98.8089	169.356	0.166875	4
con	3	1	10	Tue	UR	LL	38	64.8613	53.6596	118.521			1146		-0.0945119	64.8613	53.6596	118.521	-0.0945119	5
con	3	1	11	Wed	UL	LR	35	79.2489	90.7458	169.995			1170		0.0676304	79.2489	90.7458	169.995	0.0676304	1
con	3	1	12	Wed	LL	LR	23	96.0821	78.137	174.219			1174		-0.103003	96.0821	78.137	174.219	-0.103003	2
con	3	1	13	Wed	UL	LL	18	101.586	80.4313	182.017			1178		-0.116222	101.586	80.4313	182.017	-0.116222	3
con	3	1	14	Wed	UL	UR	3	43.2334	47.243	90.4764			1182		0.0443164	43.2334	47.243	90.4764	0.0443164	4
con	3	1	15	Wed	LL	LR	33	79.5519	126.904	206.456			1186		0.229359	79.5519	126.904	206.456	0.229359	5
con	3	1	16	Thu	LR	UR	8	36.4844	26.3472	62.8315			1210		-0.161339	36.4844	26.3472	62.8315	-0.161339	1
con	3	1	17	Thu	LL	UR	15	83.9359	81.239	165.175			1214		-0.0163278	83.9359	81.239	165.175	-0.0163278	2
con	3	1	18	Thu	UL	UR	29	41.3559	28.916	70.272			1218		-0.177025	41.3559	28.916	70.272	-0.177025	3
con	3	1	19	Thu	LR	LL	19	127.191	100.696	227.887			1222		-0.116261	127.191	100.696	227.887	-0.116261	4
con	3	1	20	Thu	UL	UR	17	54.5164	46.2968	100.813			1226		-0.0815331	54.5164	46.2968	100.813	-0.0815331	5
con	3	1	21	Fri	LR	LL	30	93.9275	141.528	235.455			1250		0.202163	51.0466	80.7059	131.752	0.225114	1
or	1	2	1	Mon	UR	LR	32	112.389	102.786	215.175			755		-0.0446277	112.389	102.786	215.175	-0.0446277	1
or	1	2	2	Mon	UR	LL	34	69.3099	47.6908	117.001			759		-0.184778	69.3099	47.6908	117.001	-0.184778	2
or	1	2	3	Mon	UR	UL	7	41.9887	48.8658	90.8545			763		0.0756943	41.9887	48.8658	90.8545	0.0756943	3
or	1	2	4	Mon	UR	LL	36	118.922	110.609	229.531			767		-0.0362196	118.922	110.609	229.531	-0.0362196	4
or	1	2	5	Mon	UR	LR	31	58.978	82.4621	141.44			771		0.166036	58.978	82.4621	141.44	0.166036	5
or	1	2	6	Tue	UR	LL	2	43.8006	74.0597	117.86			795		0.256737	43.8006	74.0597	117.86	0.256737	1
or	1	2	7	Tue	UR	UL	33	53.273	93.7811	147.054			799		0.275464	53.273	93.7811	147.054	0.275464	2
or	1	2	8	Tue	UR	LR	24	53.8378	69.0045	122.842			803		0.123465	53.8378	69.0045	122.842	0.123465	3
or	1	2	9	Tue	UR	LR	8	40.0708	37.9123	77.9831			807		-0.0276782	40.0708	37.9123	77.9831	-0.0276782	4
or	1	2	10	Tue	UR	LL	18	55.0646	116.85	171.914			811		0.359395	55.0646	116.85	171.914	0.359395	5
or	1	2	11	Wed	UR	UL	12	54.402	49.2182	103.62			835		-0.0500271	54.402	49.2182	103.62	-0.0500271	1
or	1	2	12	Wed	UR	LR	3	48.9319	58.5584	107.49			839		0.0895566	48.9319	58.5584	107.49	0.0895566	2
or	1	2	13	Wed	UR	LL	4	52.7741	155.409	208.183			843		0.493003	52.7741	155.409	208.183	0.493003	3
or	1	2	14	Wed	UR	LR	13	62.6353	70.1007	132.736			847		0.0562428	62.6353	70.1007	132.736	0.0562428	4
or	1	2	15	Wed	UR	LL	9	116.333	80.3156	196.649			851		-0.183156	116.333	80.3156	196.649	-0.183156	5
or	1	2	16	Thu	UR	LL	40	38.8824	35.0698	73.9522			875		-0.0515548	38.8824	35.0698	73.9522	-0.0515548	1
or	1	2	17	Thu	UR	LR	19	57.6497	87.1158	144.765			879		0.203544	57.6497	87.1158	144.765	0.203544	2
or	1	2	18	Thu	UR	LR	26	70.5784	56.1499	126.728			883		-0.113853	70.5784	56.1499	126.728	-0.113853	3
or	1	2	19	Thu	UR	LL	38	67.299	103.301	170.6			887		0.211029	67.299	103.301	170.6	0.211029	4
or	1	2	20	Thu	UR	UL	41	51.0821	73.2847	124.367			891		0.178524	51.0821	73.2847	124.367	0.178524	5
or	1	2	21	Fri	UR	UL	14	111.685	108.224	219.909			915		-0.015741	57.7986	77.5904	135.389	0.146185	1
con	2	2	1	Mon	LL	LR	25	52.5806	63.0638	115.644			923		0.0906497	52.5806	63.0638	115.644	0.0906497	1
con	2	2	2	Mon	UL	LR	20	58.8716	71.225	130.097			927		0.0949556	58.8716	71.225	130.097	0.0949556	2
con	2	2	3	Mon	LR	UR	5	81.5528	135.919	217.472			931		0.249991	81.5528	135.919	217.472	0.249991	3
con	2	2	4	Mon	UL	UR	29	46.9435	74.8045	121.748			935		0.228841	46.9435	74.8045	121.748	0.228841	4
con	2	2	5	Mon	LL	LR	10	58.2942	78.2712	136.565			939		0.146281	58.2942	78.2712	136.565	0.146281	5
con	2	2	6	Tue	UL	LL	17	44.0067	89.6822	133.689			963		0.341655	44.0067	89.6822	133.689	0.341655	1
con	2	2	7	Tue	LL	UR	37	59.4443	127.216	186.66			967		0.363074	59.4443	127.216	186.66	0.363074	2
con	2	2	8	Tue	UL	UR	35	127.413	105.231	232.645			971		-0.0953481	127.413	105.231	232.645	-0.0953481	3
con	2	2	9	Tue	LR	LL	6	62.5049	111.174	173.679			975		0.280224	62.5049	111.174	173.679	0.280224	4
con	2	2	10	Tue	UR	UL	16	54.6542	78.7908	133.445			979		0.180873	54.6542	78.7908	133.445	0.180873	5
con	2	2	11	Wed	LL	LR	11	49.2983	69.8179	119.116			1003		0.172265	49.2983	69.8179	119.116	0.172265	1
con	2	2	12	Wed	LL	UR	22	38.8113	64.8599	103.671			1007		0.251262	38.8113	64.8599	103.671	0.251262	2
con	2	2	13	Wed	LR	UR	24	44.9803	60.8179	105.798			1011		0.149696	44.9803	60.8179	105.798	0.149696	3
con	2	2	14	Wed	LR	LL	9	102.809	70.0803	172.89			1015		-0.189306	102.809	70.0803	172.89	-0.189306	4
con	2	2	15	Wed	UR	UL	39	67.8967	84.3919	152.289			1019		0.108315	67.8967	84.3919	152.289	0.108315	5
con	2	2	16	Thu	UL	LL	15	33.4446	47.4755	80.9201			1043		0.173391	33.4446	47.4755	80.9201	0.173391	1
con	2	2	17	Thu	UL	LR	4	90.1105	88.626	178.736			1047		-0.00830537	90.1105	88.626	178.736	-0.00830537	2
con	2	2	18	Thu	LL	UL	12	53.7677	42.3116	96.0793			1051		-0.119236	53.7677	42.3116	96.0793	-0.119236	3
con	2	2	19	Thu	LR	UR	30	87.9853	74.6197	162.605			1055		-0.0821969	87.9853	74.6197	162.605	-0.0821969	4
con	2	2	20	Thu	UL	UR	38	50.9649	67.4012	118.366			1059		0.138859	50.9649	67.4012	118.366	0.138859	5
con	2	2	21	Fri	LL	LR	40	77.4502	122.057	199.507			1083		0.223586	40.3584	59.9041	100.262	0.194946	1
od	3	2	1	Mon	LL	LR	36	111.341	85.0294	196.371			1091		-0.13399	111.341	85.0294	196.371	-0.13399	1
od	3	2	2	Mon	LL	LR	16	93.9015	97.581	191.483			1095		0.0192154	93.9015	97.581	191.483	0.0192154	2
od	3	2	3	Mon	LL	LR	21	70.7243	92.0914	162.816			1099		0.131235	70.7243	92.0914	162.816	0.131235	3
od	3	2	4	Mon	LL	LR	39	69.6537	99.2872	168.941			1103		0.175408	69.6537	99.2872	168.941	0.175408	4
od	3	2	5	Mon	LL	LR	6	74.0842	70.7765	144.861			1107		-0.0228337	74.0842	70.7765	144.861	-0.0228337	5
od	3	2	6	Tue	LL	LR	11	20.4323	39.2603	59.6926			1131		0.315416	20.4323	39.2603	59.6926	0.315416	1
od	3	2	7	Tue	LL	LR	34	36.1348	46.1051	82.2399			1135		0.121235	36.1348	46.1051	82.2399	0.121235	2
od	3	2	8	Tue	LL	LR	2	35.7657	56.917	92.6827			1139		0.228211	35.7657	56.917	92.6827	0.228211	3
od	3	2	9	Tue	LL	LR	32	107.761	105.23	212.991			1143		-0.0118837	107.761	105.23	212.991	-0.0118837	4
od	3	2	10	Tue	LL	LR	38	68.3149	51.6104	119.925			1147		-0.139291	68.3149	51.6104	119.925	-0.139291	5
od	3	2	11	Wed	LL	LR	35	68.3367	96.6565	164.993			1171		0.171642	68.3367	96.6565	164.993	0.171642	1
od	3	2	12	Wed	LL	LR	23	62.7592	71.7136	134.473			1175		0.0665892	62.7592	71.7136	134.473	0.0665892	2
od	3	2	13	Wed	LL	LR	18	62.5488	58.4806	121.029			1179		-0.033613	62.5488	58.4806	121.029	-0.033613	3
od	3	2	14	Wed	LL	LR	3	48.8948	65.0942	113.989			1183		0.142114	48.8948	65.0942	113.989	0.142114	4
od	3	2	15	Wed	LL	LR	33	114.514	64.7524	179.266			1187		-0.277585	114.514	64.7524	179.266	-0.277585	5
od	3	2	16	Thu	LL	LR	8	46.8791	36.3664	83.2455			1211		-0.126286	46.8791	36.3664	83.2455	-0.126286	1
od	3	2	17	Thu	LL	LR	15	117.222	55.9672	173.189			1215		-0.353687	117.222	55.9672	173.189	-0.353687	2
od	3	2	18	Thu	LL	LR	29	49.9189	42.5977	92.5167			1219		-0.0791341	49.9189	42.5977	92.5167	-0.0791341	3
od	3	2	19	Thu	LL	LR	19	56.6386	45.0469	101.686			1223		-0.113995	56.6386	45.0469	101.686	-0.113995	4
od	3	2	20	Thu	LL	LR	17	21.9653	35.4151	57.3804			1227		0.234396	21.9653	35.4151	57.3804	0.234396	5
od	3	2	21	Fri	LL	UR	30	83.8152	85.1451	168.96			1251		0.00787147	43.6903	48.1552	91.8455	0.0486138	1
con	1	3	1	Mon	UL	LL	32	97.9766	95.61	193.587			756		-0.0122246	97.9766	95.61	193.587	-0.0122246	1
con	1	3	2	Mon	UL	LR	34	76.182	47.5546	123.737			760		-0.231358	76.182	47.5546	123.737	-0.231358	2
con	1	3	3	Mon	UL	UR	7	62.4849	62.2533	124.738			764		-0.0018568	62.4849	62.2533	124.738	-0.0018568	3
con	1	3	4	Mon	LL	LR	36	130.803	69.2608	200.064			768		-0.307613	130.803	69.2608	200.064	-0.307613	4
con	1	3	5	Mon	UR	LR	31	99.8445	88.5264	188.371			772		-0.0600845	99.8445	88.5264	188.371	-0.0600845	5
con	1	3	6	Tue	LL	LR	2	76.1695	40.8716	117.041			796		-0.301585	76.1695	40.8716	117.041	-0.301585	1
con	1	3	7	Tue	LL	UR	33	0	0	0			408			0	0	0	0	2
con	1	3	8	Tue	LR	UR	24	31.3584	63.8106	95.1691			804		0.340996	31.3584	63.8106	95.1691	0.340996	3
con	1	3	9	Tue	UR	UL	8	48.9529	92.3639	141.317			808		0.307189	48.9529	92.3639	141.317	0.307189	4
con	1	3	10	Tue	LR	LL	18	91.1305	149.987	241.118			812		0.2441	91.1305	149.987	241.118	0.2441	5
con	1	3	11	Wed	UL	LL	12	73.6602	96.3113	169.971			836		0.133264	73.6602	96.3113	169.971	0.133264	1
con	1	3	12	Wed	LR	UR	3	50.9202	33.1273	84.0475			840		-0.2117	50.9202	33.1273	84.0475	-0.2117	2
con	1	3	13	Wed	LL	UR	4	98.3028	140.575	238.878			844		0.176963	98.3028	140.575	238.878	0.176963	3
con	1	3	14	Wed	LL	LR	13	38.1593	50.6905	88.8498			848		0.141038	38.1593	50.6905	88.8498	0.141038	4
con	1	3	15	Wed	UR	UL	9	90.8034	118.307	209.11			852		0.131526	90.8034	118.307	209.11	0.131526	5
con	1	3	16	Thu	UL	UR	40	28.648	47.9874	76.6354			876		0.252355	28.648	47.9874	76.6354	0.252355	1
con	1	3	17	Thu	UL	LR	19	62.3392	42.8764	105.216			880		-0.18498	62.3392	42.8764	105.216	-0.18498	2
con	1	3	18	Thu	LR	LL	26	93.9693	106.712	200.681			884		0.0634965	93.9693	106.712	200.681	0.0634965	3
con	1	3	19	Thu	UR	UL	38	64.6939	70.1708	134.865			888		0.0406104	64.6939	70.1708	134.865	0.0406104	4
con	1	3	20	Thu	LL	LR	41	59.7409	56.8249	116.566			892		-0.0250166	59.7409	56.8249	116.566	-0.0250166	5
con	1	3	21	Fri	UL	UR	14	144.38	138.759	283.139			916		-0.019854	71.3147	66.1896	137.504	-0.0372724	1
od	2	3	1	Mon	UR	UL	25	65.8858	62.3579	128.244			924		-0.0275093	65.8858	62.3579	128.244	-0.0275093	1
od	2	3	2	Mon	UR	UL	20	26.0442	54.9108	80.955			928		0.356576	26.0442	54.9108	80.955	0.356576	2
od	2	3	3	Mon	UR	UL	5	97.0956	93.4973	190.593			932		-0.0188796	97.0956	93.4973	190.593	-0.0188796	3
od	2	3	4	Mon	UR	UL	29	50.5058	50.916	101.422			936		0.00404419	50.5058	50.916	101.422	0.00404419	4
od	2	3	5	Mon	UR	UL	10	74.9419	64.5461	139.488			940		-0.0745285	74.9419	64.5461	139.488	-0.0745285	5
od	2	3	6	Tue	UR	UL	17	71.3062	84.4279	155.734			964		0.084257	71.3062	84.4279	155.734	0.084257	1
od	2	3	7	Tue	UR	UL	37	94.9546	100.455	195.409			968		0.0281471	94.9546	100.455	195.409	0.0281471	2
od	2	3	8	Tue	UR	UL	35	48.3226	199.649	247.972			972		0.610258	48.3226	199.649	247.972	0.610258	3
od	2	3	9	Tue	UR	UL	6	96.0761	84.9263	181.002			976		-0.0616003	96.0761	84.9263	181.002	-0.0616003	4
od	2	3	10	Tue	UR	UL	16	69.7237	142.95	212.674			980		0.344313	69.7237	142.95	212.674	0.344313	5
od	2	3	11	Wed	UR	UL	11	101.321	51.3861	152.707			1004		-0.326998	101.321	51.3861	152.707	-0.326998	1
od	2	3	12	Wed	UR	UL	22	70.8196	54.4495	125.269			1008		-0.13068	70.8196	54.4495	125.269	-0.13068	2
od	2	3	13	Wed	UR	UL	24	25.6389	92.0536	117.692			1012		0.564307	25.6389	92.0536	117.692	0.564307	3
od	2	3	14	Wed	UR	UL	9	105.957	77.3656	183.323			1016		-0.155962	105.957	77.3656	183.323	-0.155962	4
od	2	3	15	Wed	UR	UL	39	60.4261	129.03	189.456			1020		0.362109	60.4261	129.03	189.456	0.362109	5
od	2	3	16	Thu	UR	UL	15	59.9683	48.5822	108.551			1044		-0.104892	59.9683	48.5822	108.551	-0.104892	1
od	2	3	17	Thu	UR	UL	4	90.4757	61.7058	152.181			1048		-0.18905	90.4757	61.7058	152.181	-0.18905	2
od	2	3	18	Thu	UR	UL	12	70.5364	41.3799	111.916			1052		-0.260521	70.5364	41.3799	111.916	-0.260521	3
od	2	3	19	Thu	UR	UL	30	54.561	83.2256	137.787			1056		0.208036	54.561	83.2256	137.787	0.208036	4
od	2	3	20	Thu	UR	UL	38	57.2212	48.0646	105.286			1060		-0.0869689	57.2212	48.0646	105.286	-0.0869689	5
od	2	3	21	Fri	UR	LL	40	110.095	121.75	231.845			1084		0.0502672	52.0615	63.593	115.654	0.0997071	1
or	3	3	1	Mon	UL	LR	36	82.6929	98.0581	180.751			1092		0.0850072	82.6929	98.0581	180.751	0.0850072	1
or	3	3	2	Mon	UL	LL	16	63.3743	108.437	171.811			1096		0.262279	63.3743	108.437	171.811	0.262279	2
or	3	3	3	Mon	UL	UR	21	48.9935	27.2416	76.2351			1100		-0.285328	48.9935	27.2416	76.2351	-0.285328	3
or	3	3	4	Mon	UL	LR	39	55.5542	120.548	176.102			1104		0.369068	55.5542	120.548	176.102	0.369068	4
or	3	3	5	Mon	UL	LL	6	80.4093	91.7621	172.171			1108		0.065939	80.4093	91.7621	172.171	0.065939	5
or	3	3	6	Tue	UL	UR	11	61.5858	46.4484	108.034			1132		-0.140117	61.5858	46.4484	108.034	-0.140117	1
or	3	3	7	Tue	UL	LR	34	50.4931	50.718	101.211			1136		0.00222293	50.4931	50.718	101.211	0.00222293	2
or	3	3	8	Tue	UL	LL	2	41.1388	50.1611	91.2998			1140		0.0988209	41.1388	50.1611	91.2998	0.0988209	3
or	3	3	9	Tue	UL	LR	32	121.373	96.0436	217.417			1144		-0.116503	121.373	96.0436	217.417	-0.116503	4
or	3	3	10	Tue	UL	LL	38	55.4119	66.7193	122.131			1148		0.092584	55.4119	66.7193	122.131	0.092584	5
or	3	3	11	Wed	UL	LL	35	74.8913	114.894	189.785			1172		0.210779	74.8913	114.894	189.785	0.210779	1
or	3	3	12	Wed	UL	UR	23	66.3425	36.5665	102.909			1176		-0.289343	66.3425	36.5665	102.909	-0.289343	2
or	3	3	13	Wed	UL	LR	18	50.0509	90.4928	140.544			1180		0.287753	50.0509	90.4928	140.544	0.287753	3
or	3	3	14	Wed	UL	LR	3	61.2337	87.3915	148.625			1184		0.175998	61.2337	87.3915	148.625	0.175998	4
or	3	3	15	Wed	UL	LL	33	110.672	101.809	212.48			1188		-0.0417109	110.672	101.809	212.48	-0.0417109	5
or	3	3	16	Thu	UL	LL	8	85.8316	77.8217	163.653			1212		-0.0489439	85.8316	77.8217	163.653	-0.0489439	1
or	3	3	17	Thu	UL	LR	15	33.3243	106.538	139.862			1216		0.523469	33.3243	106.538	139.862	0.523469	2
or	3	3	18	Thu	UL	LL	29	51.6344	41.1387	92.7732			1220		-0.113133	51.6344	41.1387	92.7732	-0.113133	3
or	3	3	19	Thu	UL	LR	19	82.6627	107.81	190.472			1224		0.132024	82.6627	107.81	190.472	0.132024	4
or	3	3	20	Thu	UL	UR	17	67.2714	67.6375	134.909			1228		0.00271307	67.2714	67.6375	134.909	0.00271307	5
or	3	3	21	Fri	UL	UR	30	117.764	158.21	275.974			1252		0.146558	51.8435	77.547	129.39	0.198651	1
od	1	4	1	Mon	UL	UR	32	129.794	62.1076	191.902			757		-0.352716	129.794	62.1076	191.902	-0.352716	1
od	1	4	2	Mon	UL	UR	34	66.2929	48.4194	114.712			761		-0.155812	66.2929	48.4194	114.712	-0.155812	2
od	1	4	3	Mon	UL	UR	7	64.4444	33.12	97.5645			765		-0.321064	64.4444	33.12	97.5645	-0.321064	3
od	1	4	4	Mon	UL	UR	36	141.882	82.6761	224.559			769		-0.263656	141.882	82.6761	224.559	-0.263656	4
od	1	4	5	Mon	UL	UR	31	115.677	71.173	186.85			773		-0.238181	115.677	71.173	186.85	-0.238181	5
od	1	4	6	Tue	UL	UR	2	83.6386	55.1289	138.768			797		-0.20545	83.6386	55.1289	138.768	-0.20545	1
od	1	4	7	Tue	UL	UR	33	70.0244	67.3361	137.36			801		-0.0195715	70.0244	67.3361	137.36	-0.0195715	2
od	1	4	8	Tue	UL	UR	24	27.387	29.5583	56.9453			805		0.0381288	27.387	29.5583	56.9453	0.0381288	3
od	1	4	9	Tue	UL	UR	8	81.4772	35.9587	117.436			809		-0.387603	81.4772	35.9587	117.436	-0.387603	4
od	1	4	10	Tue	UL	UR	18	104.052	31.1926	135.245			813		-0.538723	104.052	31.1926	135.245	-0.538723	5
od	1	4	11	Wed	UL	UR	12	95.8155	71.5276	167.343			837		-0.145138	95.8155	71.5276	167.343	-0.145138	1
od	1	4	12	Wed	UL	UR	3	103.281	73.2213	176.503			841		-0.170308	103.281	73.2213	176.503	-0.170308	2
od	1	4	13	Wed	UL	UR	4	112.995	121.122	234.117			845		0.0347128	112.995	121.122	234.117	0.0347128	3
od	1	4	14	Wed	UL	UR	13	37.3539	75.1177	112.472			849		0.335763	37.3539	75.1177	112.472	0.335763	4
od	1	4	15	Wed	UL	UR	9	87.5402	87.2496	174.79			853		-0.00166255	87.5402	87.2496	174.79	-0.00166255	5
od	1	4	16	Thu	UL	UR	40	68.2634	56.0929	124.356			877		-0.0978677	68.2634	56.0929	124.356	-0.0978677	1
od	1	4	17	Thu	UL	UR	19	136.661	64.7909	201.452			881		-0.356761	136.661	64.7909	201.452	-0.356761	2
od	1	4	18	Thu	UL	UR	26	88.9315	77.0385	165.97			885		-0.0716577	88.9315	77.0385	165.97	-0.0716577	3
od	1	4	19	Thu	UL	UR	38	86.4066	103.103	189.509			889		0.0881011	86.4066	103.103	189.509	0.0881011	4
od	1	4	20	Thu	UL	UR	41	146.674	47.0062	193.68			893		-0.5146	146.674	47.0062	193.68	-0.5146	5
od	1	4	21	Fri	UL	LR	14	146.334	87.3081	233.642			917		-0.252634	57.1271	45.8439	102.971	-0.109577	1
or	2	4	1	Mon	LR	LL	25	34.396	125.303	159.699			925		0.569239	34.396	125.303	159.699	0.569239	1
or	2	4	2	Mon	LR	UR	20	84.2649	78.2684	162.533			929		-0.036894	84.2649	78.2684	162.533	-0.036894	2
or	2	4	3	Mon	LR	UL	5	71.4184	138.097	209.515			933		0.318251	71.4184	138.097	209.515	0.318251	3
or	2	4	4	Mon	LR	LL	29	80.6797	73.7577	154.437			937		-0.0448203	80.6797	73.7577	154.437	-0.0448203	4
or	2	4	5	Mon	LR	UR	10	65.2634	71.5355	136.799			941		0.0458491	65.2634	71.5355	136.799	0.0458491	5
or	2	4	6	Tue	LR	UR	17	73.1608	83.8187	156.98			965		0.067894	73.1608	83.8187	156.98	0.067894	1
or	2	4	7	Tue	LR	UL	37	54.9894	137.614	192.604			969		0.428989	54.9894	137.614	192.604	0.428989	2
or	2	4	8	Tue	LR	LL	35	158.936	101.437	260.372			973		-0.220833	158.936	101.437	260.372	-0.220833	3
or	2	4	9	Tue	LR	LL	6	81.5991	120.425	202.024			977		0.192183	81.5991	120.425	202.024	0.192183	4
or	2	4	10	Tue	LR	UR	16	101.664	138.697	240.361			981		0.154074	101.664	138.697	240.361	0.154074	5
or	2	4	11	Wed	LR	LL	11	68.4233	69.8111	138.234			1005		0.01004	68.4233	69.8111	138.234	0.01004	1
or	2	4	12	Wed	LR	UR	22	53.1364	57.9877	111.124			1009		0.0436574	53.1364	57.9877	111.124	0.0436574	2
or	2	4	13	Wed	LR	UL	24	48.713	99.0342	147.747			1013		0.34059	48.713	99.0342	147.747	0.34059	3
or	2	4	14	Wed	LR	UR	9	82.055	110.171	192.226			1017		0.146265	82.055	110.171	192.226	0.146265	4
or	2	4	15	Wed	LR	LL	39	123.024	75.7212	198.745			1021		-0.238007	123.024	75.7212	198.745	-0.238007	5
or	2	4	16	Thu	LR	UR	15	43.6973	66.4242	110.122			1045		0.206379	43.6973	66.4242	110.122	0.206379	1
or	2	4	17	Thu	LR	LL	4	96.5921	92.2946	188.887			1049		-0.0227519	96.5921	92.2946	188.887	-0.0227519	2
or	2	4	18	Thu	LR	UR	12	65.1508	45.2963	110.447			1053		-0.179764	65.1508	45.2963	110.447	-0.179764	3
or	2	4	19	Thu	LR	LL	30	42.1935	119.476	161.669			1057		0.478028	42.1935	119.476	161.669	0.478028	4
or	2	4	20	Thu	LR	UL	38	62.5494	81.5928	144.142			1061		0.132116	62.5494	81.5928	144.142	0.132116	5
or	2	4	21	Fri	LR	UL	40	80.9032	201.591	282.494			1085		0.427222	18.3534	119.2	137.553	0.733145	1
con	3	4	1	Mon	LL	UR	36	93.5086	95.0755	188.584			1093		0.00830868	93.5086	95.0755	188.584	0.00830868	1
con	3	4	2	Mon	UL	UR	16	97.9032	78.5939	176.497			1097		-0.109403	97.9032	78.5939	176.497	-0.109403	2
con	3	4	3	Mon	LR	UR	21	51.3238	55.6773	107.001			1101		0.0406862	51.3238	55.6773	107.001	0.0406862	3
con	3	4	4	Mon	UR	UL	39	67.6592	63.2374	130.897			1105		-0.0337808	67.6592	63.2374	130.897	-0.0337808	4
con	3	4	5	Mon	LL	LR	6	79.1262	51.9644	131.091			1109		-0.207199	79.1262	51.9644	131.091	-0.207199	5
con	3	4	6	Tue	UL	LR	11	52.8178	35.3982	88.2159			1133		-0.197465	52.8178	35.3982	88.2159	-0.197465	1
con	3	4	7	Tue	UL	LL	34	23.2016	49.6177	72.8192			1137		0.362763	23.2016	49.6177	72.8192	0.362763	2
con	3	4	8	Tue	LL	LR	2	48.3194	31.4124	79.7318			1141		-0.212047	48.3194	31.4124	79.7318	-0.212047	3
con	3	4	9	Tue	UR	UL	32	95.8045	123.632	219.436			1145		0.126811	95.8045	123.632	219.436	0.126811	4
con	3	4	10	Tue	LR	LL	38	47.8554	82.0723	129.928			1149		0.263354	47.8554	82.0723	129.928	0.263354	5
con	3	4	11	Wed	LR	UR	35	63.11	131.504	194.614			1173		0.351435	63.11	131.504	194.614	0.351435	1
con	3	4	12	Wed	UL	LL	23	37.4848	84.0933	121.578			1177		0.383362	37.4848	84.0933	121.578	0.383362	2
con	3	4	13	Wed	LL	UR	18	55.0576	70.3665	125.424			1181		0.122058	55.0576	70.3665	125.424	0.122058	3
con	3	4	14	Wed	UR	UL	3	49.7044	45.0236	94.728			1185		-0.0494126	49.7044	45.0236	94.728	-0.0494126	4
con	3	4	15	Wed	LL	LR	33	108.4	75.2598	183.659			1189		-0.180442	108.4	75.2598	183.659	-0.180442	5
con	3	4	16	Thu	UL	UR	8	46.9687	54.9712	101.94			1213		0.0785024	46.9687	54.9712	101.94	0.0785024	1
con	3	4	17	Thu	LL	LR	15	36.668	88.1534	124.821			1217		0.412472	36.668	88.1534	124.821	0.412472	2
con	3	4	18	Thu	LR	UL	29	58.4487	62.7607	121.209			1221		0.0355747	58.4487	62.7607	121.209	0.0355747	3
con	3	4	19	Thu	LL	UR	19	94.9986	62.6029	157.601			1225		-0.205554	94.9986	62.6029	157.601	-0.205554	4
con	3	4	20	Thu	LR	UL	17	58.2235	60.6899	118.913			1229		0.0207414	58.2235	60.6899	118.913	0.0207414	5
con	3	4	21	Fri	UR	LL	30	150.222	119.612	269.834			1253		-0.11344	81.2262	49.5597	130.786	-0.242125	1
or	1	5	1	Mon	LL	UL	32	50.5569	83.0695	133.626			774		0.243309	50.5569	83.0695	133.626	0.243309	1
or	1	5	2	Mon	LL	UR	34	51.7536	60.5837	112.337			778		0.0786029	51.7536	60.5837	112.337	0.0786029	2
or	1	5	3	Mon	LL	LR	7	54.5789	37.1789	91.7578			782		-0.18963	54.5789	37.1789	91.7578	-0.18963	3
or	1	5	4	Mon	LL	UL	36	133.917	74.9942	208.911			786		-0.282047	133.917	74.9942	208.911	-0.282047	4
or	1	5	5	Mon	LL	UR	31	97.0315	63.5848	160.616			790		-0.208239	97.0315	63.5848	160.616	-0.208239	5
or	1	5	6	Tue	LL	UR	2	43.2753	47.288	90.5633			814		0.0443077	43.2753	47.288	90.5633	0.0443077	1
or	1	5	7	Tue	LL	LR	33	84.4082	48.754	133.162			818		-0.26775	84.4082	48.754	133.162	-0.26775	2
or	1	5	8	Tue	LL	UL	24	47.7023	84.6531	132.355			822		0.279179	47.7023	84.6531	132.355	0.279179	3
or	1	5	9	Tue	LL	UR	8	43.0858	89.1912	132.277			826		0.348552	43.0858	89.1912	132.277	0.348552	4
or	1	5	10	Tue	LL	UL	18	137.662	46.6509	184.313			830		-0.493785	137.662	46.6509	184.313	-0.493785	5
or	1	5	11	Wed	LL	LR	12	71.8375	85.9151	157.753			854		0.089239	71.8375	85.9151	157.753	0.089239	1
or	1	5	12	Wed	LL	UL	3	73.5234	124.394	197.917			858		0.257029	73.5234	124.394	197.917	0.257029	2
or	1	5	13	Wed	LL	UR	4	37.5319	130.962	168.493			862		0.554501	37.5319	130.962	168.493	0.554501	3
or	1	5	14	Wed	LL	UL	13	89.0799	32.6663	121.746			866		-0.46337	89.0799	32.6663	121.746	-0.46337	4
or	1	5	15	Wed	LL	UR	9	83.9309	120.374	204.304			870		0.178374	83.9309	120.374	204.304	0.178374	5
or	1	5	16	Thu	LL	UL	40	50.4578	43.1365	93.5943			894		-0.0782237	50.4578	43.1365	93.5943	-0.0782237	1
or	1	5	17	Thu	LL	UR	19	62.7423	83.451	146.193			898		0.141653	62.7423	83.451	146.193	0.141653	2
or	1	5	18	Thu	LL	UR	26	93.0355	44.7811	137.817			902		-0.350135	93.0355	44.7811	137.817	-0.350135	3
or	1	5	19	Thu	LL	UL	38	64.8221	48.8518	113.674			906		-0.140493	64.8221	48.8518	113.674	-0.140493	4
or	1	5	20	Thu	LL	LR	41	53.5398	80.9369	134.477			910		0.203731	53.5398	80.9369	134.477	0.203731	5
or	1	5	21	Fri	LL	LR	14	88.8181	82.1189	170.937			918		-0.0391907	64.3539	43.0685	107.422	-0.198147	1
con	2	5	1	Mon	UL	LL	25	36.9229	48.633	85.556			942		0.136871	36.9229	48.633	85.556	0.136871	1
con	2	5	2	Mon	LL	UR	20	56.9	96.9037	153.804			946		0.260095	56.9	96.9037	153.804	0.260095	2
con	2	5	3	Mon	UL	UR	5	73.3176	110.835	184.153			950		0.20373	73.3176	110.835	184.153	0.20373	3
con	2	5	4	Mon	LR	UL	29	60.5489	17.0011	77.55			954		-0.561546	60.5489	17.0011	77.55	-0.561546	4
con	2	5	5	Mon	UR	LL	10	62.0843	94.3538	156.438			958		0.206276	62.0843	94.3538	156.438	0.206276	5
con	2	5	6	Tue	LL	LR	17	67.3452	55.588	122.933			982		-0.0956391	67.3452	55.588	122.933	-0.0956391	1
con	2	5	7	Tue	UL	LR	37	116.255	60.4607	176.716			986		-0.315729	116.255	60.4607	176.716	-0.315729	2
con	2	5	8	Tue	LR	UR	35	90.7925	143.906	234.698			990		0.226304	90.7925	143.906	234.698	0.226304	3
con	2	5	9	Tue	UR	LL	6	57.9952	99.749	157.744			994		0.264694	57.9952	99.749	157.744	0.264694	4
con	2	5	10	Tue	UL	LR	16	87.3756	123.307	210.683			998		0.170548	87.3756	123.307	210.683	0.170548	5
con	2	5	11	Wed	UL	UR	11	20.1762	39.8823	60.0585			1022		0.328114	20.1762	39.8823	60.0585	0.328114	1
con	2	5	12	Wed	UL	LR	22	43.2158	68.489	111.705			1026		0.22625	43.2158	68.489	111.705	0.22625	2
con	2	5	13	Wed	LL	LR	24	40.7214	75.5451	116.266			1030		0.299516	40.7214	75.5451	116.266	0.299516	3
con	2	5	14	Wed	UR	LL	9	121.312	62.6252	183.937			1034		-0.319059	121.312	62.6252	183.937	-0.319059	4
con	2	5	15	Wed	UL	LR	39	64.3585	74.4874	138.846			1038		0.0729506	64.3585	74.4874	138.846	0.0729506	5
con	2	5	16	Thu	UL	LL	15	36.103	43.4948	79.5978			1062		0.0928644	36.103	43.4948	79.5978	0.0928644	1
con	2	5	17	Thu	LR	UR	4	57.132	165.486	222.618			1066		0.486726	57.132	165.486	222.618	0.486726	2
con	2	5	18	Thu	LL	LR	12	99.0082	60.8437	159.852			1070		-0.238749	99.0082	60.8437	159.852	-0.238749	3
con	2	5	19	Thu	UR	UL	30	77.3731	75.1148	152.488			1074		-0.0148095	77.3731	75.1148	152.488	-0.0148095	4
con	2	5	20	Thu	UL	LL	38	43.0143	46.6575	89.6718			1078		0.0406288	43.0143	46.6575	89.6718	0.0406288	5
con	2	5	21	Fri	LL	UR	40	88.606	73.5927	162.199			1086		-0.0925614	38.0454	28.8091	66.8546	-0.138155	1
od	3	5	1	Mon	LR	LL	36	94.1066	75.5686	169.675			1110		-0.109256	94.1066	75.5686	169.675	-0.109256	1
od	3	5	2	Mon	LR	LL	16	87.5343	88.6633	176.198			1114		0.00640763	87.5343	88.6633	176.198	0.00640763	2
od	3	5	3	Mon	LR	LL	21	60.2584	34.9523	95.2107			1118		-0.26579	60.2584	34.9523	95.2107	-0.26579	3
od	3	5	4	Mon	LR	LL	39	80.0806	67.3699	147.45			1122		-0.086203	80.0806	67.3699	147.45	-0.086203	4
od	3	5	5	Mon	LR	LL	6	84.5129	62.0478	146.561			1126		-0.153282	84.5129	62.0478	146.561	-0.153282	5
od	3	5	6	Tue	LR	LL	11	26.6652	15.2964	41.9615			1150		-0.270934	26.6652	15.2964	41.9615	-0.270934	1
od	3	5	7	Tue	LR	LL	34	54.5031	28.586	83.0892			1154		-0.311919	54.5031	28.586	83.0892	-0.311919	2
od	3	5	8	Tue	LR	LL	2	89.1512	32.6182	121.769			1158		-0.464263	89.1512	32.6182	121.769	-0.464263	3
od	3	5	9	Tue	LR	LL	32	98.511	106.525	205.036			1162		0.0390843	98.511	106.525	205.036	0.0390843	4
od	3	5	10	Tue	LR	LL	38	43.8753	65.848	109.723			1166		0.200255	43.8753	65.848	109.723	0.200255	5
od	3	5	11	Wed	LR	LL	35	129.639	84.6069	214.246			1190		-0.21019	129.639	84.6069	214.246	-0.21019	1
od	3	5	12	Wed	LR	LL	23	76.5697	97.3856	173.955			1194		0.119662	76.5697	97.3856	173.955	0.119662	2
od	3	5	13	Wed	LR	LL	18	79.2596	75.199	154.459			1198		-0.0262895	79.2596	75.199	154.459	-0.0262895	3
od	3	5	14	Wed	LR	LL	3	80.1577	47.5434	127.701			1202		-0.255395	80.1577	47.5434	127.701	-0.255395	4
od	3	5	15	Wed	LR	LL	33	75.8624	136.914	212.776			1206		0.286927	75.8624	136.914	212.776	0.286927	5
od	3	5	16	Thu	LR	LL	8	70.7972	52.1202	122.917			1230		-0.151948	70.7972	52.1202	122.917	-0.151948	1
od	3	5	17	Thu	LR	LL	15	63.7427	71.5214	135.264			1234		0.057507	63.7427	71.5214	135.264	0.057507	2
od	3	5	18	Thu	LR	LL	29	40.9655	61.6313	102.597			1238		0.201427	40.9655	61.6313	102.597	0.201427	3
od	3	5	19	Thu	LR	LL	19	50.569	68.5726	119.142			1242		0.151111	50.569	68.5726	119.142	0.151111	4
od	3	5	20	Thu	LR	LL	17	37.5385	51.9301	89.4686			1246		0.160857	37.5385	51.9301	89.4686	0.160857	5
od	3	5	21	Fri	LR	UL	30	96.3411	97.7728	194.114			1254		0.00737553	42.9661	37.9741	80.9402	-0.061676	1
od	1	6	1	Mon	UR	LL	32	65.053	82.7439	147.797			775		0.119698	65.053	82.7439	147.797	0.119698	1
od	1	6	2	Mon	UR	LL	34	67.447	71.9773	139.424			779		0.0324927	67.447	71.9773	139.424	0.0324927	2
od	1	6	3	Mon	UR	LL	7	53.04	76.0846	129.125			783		0.178468	53.04	76.0846	129.125	0.178468	3
od	1	6	4	Mon	UR	LL	36	104.195	90.7017	194.897			787		-0.0692332	104.195	90.7017	194.897	-0.0692332	4
od	1	6	5	Mon	UR	LL	31	69.9633	75.2631	145.226			791		0.0364931	69.9633	75.2631	145.226	0.0364931	5
od	1	6	6	Tue	UR	LL	2	30.7528	60.5082	91.261			815		0.326047	30.7528	60.5082	91.261	0.326047	1
od	1	6	7	Tue	UR	LL	33	67.0037	70.3329	137.337			819		0.0242412	67.0037	70.3329	137.337	0.0242412	2
od	1	6	8	Tue	UR	LL	24	37.0908	75.5203	112.611			823		0.341259	37.0908	75.5203	112.611	0.341259	3
od	1	6	9	Tue	UR	LL	8	41.8468	90.7523	132.599			827		0.368823	41.8468	90.7523	132.599	0.368823	4
od	1	6	10	Tue	UR	LL	18	80.0813	94.7964	174.878			831		0.0841451	80.0813	94.7964	174.878	0.0841451	5
od	1	6	11	Wed	UR	LL	12	61.46	81.0278	142.488			855		0.137329	61.46	81.0278	142.488	0.137329	1
od	1	6	12	Wed	UR	LL	3	98.3504	36.4184	134.769			859		-0.459543	98.3504	36.4184	134.769	-0.459543	2
od	1	6	13	Wed	UR	LL	4	90.9681	105.167	196.135			863		0.0723913	90.9681	105.167	196.135	0.0723913	3
od	1	6	14	Wed	UR	LL	13	59.662	62.0394	121.701			867		0.0195349	59.662	62.0394	121.701	0.0195349	4
od	1	6	15	Wed	UR	LL	9	39.3642	78.9545	118.319			871		0.334607	39.3642	78.9545	118.319	0.334607	5
od	1	6	16	Thu	UR	LL	40	29.9335	38.418	68.3514			895		0.124131	29.9335	38.418	68.3514	0.124131	1
od	1	6	17	Thu	UR	LL	19	82.6353	62.1564	144.792			899		-0.141437	82.6353	62.1564	144.792	-0.141437	2
od	1	6	18	Thu	UR	LL	26	45.7735	67.5296	113.303			903		0.192017	45.7735	67.5296	113.303	0.192017	3
od	1	6	19	Thu	UR	LL	38	48.4956	103.27	151.765			907		0.360913	48.4956	103.27	151.765	0.360913	4
od	1	6	20	Thu	UR	LL	41	84.0595	63.7286	147.788			911		-0.137568	84.0595	63.7286	147.788	-0.137568	5
od	1	6	21	Fri	UR	UL	14	52.2273	99.5891	151.816			919		0.311967	30.865	43.3288	74.1938	0.16799	1
or	2	6	1	Mon	UL	LL	25	46.0506	69.7556	115.806			943		0.204695	46.0506	69.7556	115.806	0.204695	1
or	2	6	2	Mon	UL	LR	20	39.9268	91.8457	131.773			947		0.394004	39.9268	91.8457	131.773	0.394004	2
or	2	6	3	Mon	UL	UR	5	87.3429	75.2126	162.556			951		-0.0746226	87.3429	75.2126	162.556	-0.0746226	3
or	2	6	4	Mon	UL	UR	29	34.0957	35.3845	69.4802			955		0.0185488	34.0957	35.3845	69.4802	0.0185488	4
or	2	6	5	Mon	UL	LL	10	20.4271	82.3046	102.732			959		0.602322	20.4271	82.3046	102.732	0.602322	5
or	2	6	6	Tue	UL	LL	17	69.9064	43.423	113.329			983		-0.233685	69.9064	43.423	113.329	-0.233685	1
or	2	6	7	Tue	UL	UR	37	83.8561	99.5075	183.364			987		0.0853569	83.8561	99.5075	183.364	0.0853569	2
or	2	6	8	Tue	UL	LR	35	173.506	75.0139	248.52			991		-0.396314	173.506	75.0139	248.52	-0.396314	3
or	2	6	9	Tue	UL	LL	6	76.3161	75.6634	151.979			995		-0.00429497	76.3161	75.6634	151.979	-0.00429497	4
or	2	6	10	Tue	UL	UR	16	97.1796	96.8145	193.994			999		-0.00188164	97.1796	96.8145	193.994	-0.00188164	5
or	2	6	11	Wed	UL	LR	11	34.988	60.2323	95.2203			1023		0.265115	34.988	60.2323	95.2203	0.265115	1
or	2	6	12	Wed	UL	LL	22	37.9205	58.1209	96.0414			1027		0.21033	37.9205	58.1209	96.0414	0.21033	2
or	2	6	13	Wed	UL	UR	24	30.4664	45.8805	76.3469			1031		0.201896	30.4664	45.8805	76.3469	0.201896	3
or	2	6	14	Wed	UL	UR	9	66.4077	79.1196	145.527			1035		0.0873504	66.4077	79.1196	145.527	0.0873504	4
or	2	6	15	Wed	UL	LL	39	67.4819	72.425	139.907			1039		0.0353314	67.4819	72.425	139.907	0.0353314	5
or	2	6	16	Thu	UL	UR	15	40.9344	29.3049	70.2393			1063		-0.165569	40.9344	29.3049	70.2393	-0.165569	1
or	2	6	17	Thu	UL	LL	4	103.1	68.8283	171.928			1067		-0.199337	103.1	68.8283	171.928	-0.199337	2
or	2	6	18	Thu	UL	UR	12	101.024	46.6476	147.671			1071		-0.368225	101.024	46.6476	147.671	-0.368225	3
or	2	6	19	Thu	UL	LL	30	47.2499	63.5632	110.813			1075		0.147214	47.2499	63.5632	110.813	0.147214	4
or	2	6	20	Thu	UL	LR	38	49.6151	51.5034	101.118			1079		0.0186744	49.6151	51.5034	101.118	0.0186744	5
or	2	6	21	Fri	UL	LR	40	61.2965	88.751	150.047			1087		0.182972	36.8323	33.9129	70.7452	-0.0412656	1
con	3	6	1	Mon	UL	LR	36	64.8769	76.3027	141.18			1111		0.0809308	64.8769	76.3027	141.18	0.0809308	1
con	3	6	2	Mon	UL	LL	16	74.0892	61.4608	135.55			1115		-0.0931646	74.0892	61.4608	135.55	-0.0931646	2
con	3	6	3	Mon	LL	LR	21	33.9005	53.742	87.6425			1119		0.226391	33.9005	53.742	87.6425	0.226391	3
con	3	6	4	Mon	UR	LR	39	49.357	64.9235	114.281			1123		0.136213	49.357	64.9235	114.281	0.136213	4
con	3	6	5	Mon	UL	LL	6	54.8577	46.897	101.755			1127		-0.0782338	54.8577	46.897	101.755	-0.0782338	5
con	3	6	6	Tue	LL	UR	11	49.8893	47.7276	97.6169			1151		-0.0221443	49.8893	47.7276	97.6169	-0.0221443	1
con	3	6	7	Tue	UL	UR	34	38.4616	38.921	77.3825			1155		0.00593653	38.4616	38.921	77.3825	0.00593653	2
con	3	6	8	Tue	LR	UR	2	56.5864	26.454	83.0404			1159		-0.362865	56.5864	26.454	83.0404	-0.362865	3
con	3	6	9	Tue	UL	LL	32	105.654	93.112	198.766			1163		-0.0631014	105.654	93.112	198.766	-0.0631014	4
con	3	6	10	Tue	LL	LR	38	65.4819	58.5741	124.056			1167		-0.0556835	65.4819	58.5741	124.056	-0.0556835	5
con	3	6	11	Wed	LL	LR	35	115.676	59.3672	175.043			1191		-0.321683	115.676	59.3672	175.043	-0.321683	1
con	3	6	12	Wed	UL	LL	23	38.5788	80.2414	118.82			1195		0.350635	38.5788	80.2414	118.82	0.350635	2
con	3	6	13	Wed	LR	UR	18	72.7144	55.7819	128.496			1199		-0.131775	72.7144	55.7819	128.496	-0.131775	3
con	3	6	14	Wed	UR	LR	3	85.5806	26.3376	111.918			1203		-0.529343	85.5806	26.3376	111.918	-0.529343	4
con	3	6	15	Wed	UL	LL	33	47.8576	135.6	183.458			1207		0.478271	47.8576	135.6	183.458	0.478271	5
con	3	6	16	Thu	LL	UR	8	55.7952	62.5928	118.388			1231		0.0574184	55.7952	62.5928	118.388	0.0574184	1
con	3	6	17	Thu	UL	UR	15	33.2497	60.8344	94.084			1235		0.293192	33.2497	60.8344	94.084	0.293192	2
con	3	6	18	Thu	LL	LR	29	67.0332	33.1556	100.189			1239		-0.338137	67.0332	33.1556	100.189	-0.338137	3
con	3	6	19	Thu	UL	UR	19	20.2374	35.3428	55.5801			1243		0.271778	20.2374	35.3428	55.5801	0.271778	4
con	3	6	20	Thu	UL	LR	17	58.4256	52.4302	110.856			1247		-0.0540821	58.4256	52.4302	110.856	-0.0540821	5
con	3	6	21	Fri	LL	UR	30	105.982	83.5273	189.509			1255		-0.118487	42.5873	53.3928	95.9801	0.11258	1
od	1	7	1	Mon	UL	LR	32	72.3106	74.706	147.017			776		0.0162933	72.3106	74.706	147.017	0.0162933	1
od	1	7	2	Mon	UL	LR	34	49.6262	57.6988	107.325			780		0.0752165	49.6262	57.6988	107.325	0.0752165	2
od	1	7	3	Mon	UL	LR	7	55.7321	55.0374	110.769			784		-0.00627098	55.7321	55.0374	110.769	-0.00627098	3
od	1	7	4	Mon	UL	LR	36	114.423	108.988	223.411			788		-0.0243289	114.423	108.988	223.411	-0.0243289	4
od	1	7	5	Mon	UL	LR	31	89.671	81.6123	171.283			792		-0.0470493	89.671	81.6123	171.283	-0.0470493	5
od	1	7	6	Tue	UL	LR	2	59.2631	32.6197	91.8828			816		-0.289972	59.2631	32.6197	91.8828	-0.289972	1
od	1	7	7	Tue	UL	LR	33	122.64	65.5379	188.178			820		-0.303447	122.64	65.5379	188.178	-0.303447	2
od	1	7	8	Tue	UL	LR	24	63.6088	44.1772	107.786			824		-0.180279	63.6088	44.1772	107.786	-0.180279	3
od	1	7	9	Tue	UL	LR	8	80.8354	96.4604	177.296			828		0.088129	80.8354	96.4604	177.296	0.088129	4
od	1	7	10	Tue	UL	LR	18	87.2707	87.2949	174.566			832		0.000138842	87.2707	87.2949	174.566	0.000138842	5
od	1	7	11	Wed	UL	LR	12	109.051	94.8305	203.882			856		-0.0697507	109.051	94.8305	203.882	-0.0697507	1
od	1	7	12	Wed	UL	LR	3	81.9645	104.656	186.621			860		0.121592	81.9645	104.656	186.621	0.121592	2
od	1	7	13	Wed	UL	LR	4	103.892	92.8755	196.768			864		-0.0559883	103.892	92.8755	196.768	-0.0559883	3
od	1	7	14	Wed	UL	LR	13	96.641	33.4286	130.07			868		-0.485989	96.641	33.4286	130.07	-0.485989	4
od	1	7	15	Wed	UL	LR	9	120.118	51.3836	171.501			872		-0.400779	120.118	51.3836	171.501	-0.400779	5
od	1	7	16	Thu	UL	LR	40	64.2571	23.4978	87.7549			896		-0.464467	64.2571	23.4978	87.7549	-0.464467	1
od	1	7	17	Thu	UL	LR	19	54.0849	58.6599	112.745			900		0.040578	54.0849	58.6599	112.745	0.040578	2
od	1	7	18	Thu	UL	LR	26	64.3882	81.2972	145.685			904		0.116065	64.3882	81.2972	145.685	0.116065	3
od	1	7	19	Thu	UL	LR	38	90.2071	75.2069	165.414			908		-0.0906827	90.2071	75.2069	165.414	-0.0906827	4
od	1	7	20	Thu	UL	LR	41	94.7572	51.0872	145.844			912		-0.299429	94.7572	51.0872	145.844	-0.299429	5
od	1	7	21	Fri	UL	UR	14	71.1303	107.8	178.931			920		0.20494	30.3311	59.7665	90.0976	0.326705	1
con	2	7	1	Mon	UL	LL	25	30.2076	88.0862	118.294			944		0.489278	30.2076	88.0862	118.294	0.489278	1
con	2	7	2	Mon	LL	UR	20	95.7006	52.5405	148.241			948		-0.291148	95.7006	52.5405	148.241	-0.291148	2
con	2	7	3	Mon	UL	UR	5	131.91	107.318	239.228			952		-0.102797	131.91	107.318	239.228	-0.102797	3
con	2	7	4	Mon	UR	UL	29	31.0625	92.5571	123.62			956		0.49745	31.0625	92.5571	123.62	0.49745	4
con	2	7	5	Mon	LR	LL	10	40.9025	59.8215	100.724			960		0.18783	40.9025	59.8215	100.724	0.18783	5
con	2	7	6	Tue	LL	LR	17	35.8238	48.7339	84.5577			984		0.152678	35.8238	48.7339	84.5577	0.152678	1
con	2	7	7	Tue	UL	LR	37	113.529	96.9211	210.45			988		-0.078915	113.529	96.9211	210.45	-0.078915	2
con	2	7	8	Tue	LR	UR	35	53.7268	202.226	255.953			992		0.580183	53.7268	202.226	255.953	0.580183	3
con	2	7	9	Tue	LL	UL	6	113.684	95.2929	208.977			996		-0.088005	113.684	95.2929	208.977	-0.088005	4
con	2	7	10	Tue	LR	UR	16	82.6496	158.132	240.782			1000		0.313489	82.6496	158.132	240.782	0.313489	5
con	2	7	11	Wed	LR	UR	11	84.1923	54.4888	138.681			1024		-0.214186	84.1923	54.4888	138.681	-0.214186	1
con	2	7	12	Wed	UL	LL	22	41.2146	66.5234	107.738			1028		0.23491	41.2146	66.5234	107.738	0.23491	2
con	2	7	13	Wed	UL	LR	24	53.7851	66.7715	120.557			1032		0.10772	53.7851	66.7715	120.557	0.10772	3
con	2	7	14	Wed	UR	LR	9	136.534	68.0548	204.588			1036		-0.334715	136.534	68.0548	204.588	-0.334715	4
con	2	7	15	Wed	LR	UL	39	89.2358	54.553	143.789			1040		-0.241206	89.2358	54.553	143.789	-0.241206	5
con	2	7	16	Thu	UL	UR	15	43.917	74.1254	118.042			1064		0.255911	43.917	74.1254	118.042	0.255911	1
con	2	7	17	Thu	LL	LR	4	123.847	97.6299	221.477			1068		-0.118375	123.847	97.6299	221.477	-0.118375	2
con	2	7	18	Thu	LL	UL	12	61.0423	190.224	251.266			1072		0.514122	61.0423	190.224	251.266	0.514122	3
con	2	7	19	Thu	UR	LR	30	66.9648	75.8417	142.807			1076		0.0621602	66.9648	75.8417	142.807	0.0621602	4
con	2	7	20	Thu	LL	UR	38	68.9618	114.636	183.598			1080		0.248773	68.9618	114.636	183.598	0.248773	5
con	2	7	21	Fri	UL	LR	40	120.492	123.783	244.275			1088		0.0134752	65.0657	75.1027	140.168	0.0716072	1
or	3	7	1	Mon	LR	UR	36	109.559	70.1833	179.742			1112		-0.219065	109.559	70.1833	179.742	-0.219065	1
or	3	7	2	Mon	LR	UL	16	97.0455	43.9333	140.979			1116		-0.376739	97.0455	43.9333	140.979	-0.376739	2
or	3	7	3	Mon	LR	LL	21	29.5339	44.8471	74.381			1120		0.205876	29.5339	44.8471	74.381	0.205876	3
or	3	7	4	Mon	LR	UR	39	74.1861	63.978	138.164			1124		-0.0738839	74.1861	63.978	138.164	-0.0738839	4
or	3	7	5	Mon	LR	UL	6	214.615	46.1801	260.795			1128		-0.645851	214.615	46.1801	260.795	-0.645851	5
or	3	7	6	Tue	LR	LL	11	78.8656	68.1803	147.046			1152		-0.0726662	78.8656	68.1803	147.046	-0.0726662	1
or	3	7	7	Tue	LR	UL	34	49.607	35.6359	85.2429			1156		-0.163898	49.607	35.6359	85.2429	-0.163898	2
or	3	7	8	Tue	LR	UR	2	62.6187	56.3486	118.967			1160		-0.0527043	62.6187	56.3486	118.967	-0.0527043	3
or	3	7	9	Tue	LR	UL	32	110.999	94.8213	205.82			1164		-0.078602	110.999	94.8213	205.82	-0.078602	4
or	3	7	10	Tue	LR	UR	38	40.3196	74.2187	114.538			1168		0.295963	40.3196	74.2187	114.538	0.295963	5
or	3	7	11	Wed	LR	UL	35	77.2396	120.241	197.481			1192		0.217751	77.2396	120.241	197.481	0.217751	1
or	3	7	12	Wed	LR	LL	23	53.886	65.6885	119.574			1196		0.0987041	53.886	65.6885	119.574	0.0987041	2
or	3	7	13	Wed	LR	UR	18	74.5909	84.7452	159.336			1200		0.0637285	74.5909	84.7452	159.336	0.0637285	3
or	3	7	14	Wed	LR	UR	3	81.9522	87.1827	169.135			1204		0.0309251	81.9522	87.1827	169.135	0.0309251	4
or	3	7	15	Wed	LR	UL	33	115.886	68.2943	184.181			1208		-0.258398	115.886	68.2943	184.181	-0.258398	5
or	3	7	16	Thu	LR	UL	8	61.0168	59.6649	120.682			1232		-0.0112026	61.0168	59.6649	120.682	-0.0112026	1
or	3	7	17	Thu	LR	UR	15	21.2711	62.5351	83.8063			1236		0.492374	21.2711	62.5351	83.8063	0.492374	2
or	3	7	18	Thu	LR	UL	29	42.6739	38.998	81.672			1240		-0.0450082	42.6739	38.998	81.672	-0.0450082	3
or	3	7	19	Thu	LR	UR	19	54.9927	38.1109	93.1035			1244		-0.181323	54.9927	38.1109	93.1035	-0.181323	4
or	3	7	20	Thu	LR	LL	17	62.1853	52.6436	114.829			1248		-0.0830954	62.1853	52.6436	114.829	-0.0830954	5
or	3	7	21	Fri	LR	LL	30	79.4429	86.9739	166.417			1256		0.0452538	49.022	43.4659	92.4879	-0.0600737	1
con	1	8	1	Mon	LL	UL	32	53.8318	100.049	153.881			777		0.300346	53.8318	100.049	153.881	0.300346	1
con	1	8	2	Mon	LR	UL	34	32.2294	45.9497	78.1791			781		0.175499	32.2294	45.9497	78.1791	0.175499	2
con	1	8	3	Mon	UR	UL	7	57.1283	72.8397	129.968			785		0.120887	57.1283	72.8397	129.968	0.120887	3
con	1	8	4	Mon	LR	LL	36	94.4077	99.6472	194.055			789		0.0269998	94.4077	99.6472	194.055	0.0269998	4
con	1	8	5	Mon	LR	UR	31	95.8658	76.648	172.514			793		-0.111399	95.8658	76.648	172.514	-0.111399	5
con	1	8	6	Tue	LR	LL	2	16.5239	23.1617	39.6856			817		0.167258	16.5239	23.1617	39.6856	0.167258	1
con	1	8	7	Tue	UR	LL	33	92.2192	66.9992	159.218			821		-0.158399	92.2192	66.9992	159.218	-0.158399	2
con	1	8	8	Tue	UR	LR	24	26.6677	54.0738	80.7415			825		0.33943	26.6677	54.0738	80.7415	0.33943	3
con	1	8	9	Tue	UL	UR	8	126.572	51.9493	178.521			829		-0.418005	126.572	51.9493	178.521	-0.418005	4
con	1	8	10	Tue	LL	LR	18	79.9167	80.8325	160.749			833		0.00569674	79.9167	80.8325	160.749	0.00569674	5
con	1	8	11	Wed	LL	UL	12	95.751	96.4072	192.158			857		0.00341506	95.751	96.4072	192.158	0.00341506	1
con	1	8	12	Wed	UR	LR	3	40.8548	37.5693	78.424			861		-0.041894	40.8548	37.5693	78.424	-0.041894	2
con	1	8	13	Wed	UR	LL	4	117.219	83.8655	201.084			865		-0.165868	117.219	83.8655	201.084	-0.165868	3
con	1	8	14	Wed	LR	LL	13	69.9109	92.2707	162.182			869		0.137869	69.9109	92.2707	162.182	0.137869	4
con	1	8	15	Wed	UL	UR	9	134.083	77.1021	211.185			873		-0.269815	134.083	77.1021	211.185	-0.269815	5
con	1	8	16	Thu	UR	UL	40	52.7966	62.1721	114.969			897		0.0815483	52.7966	62.1721	114.969	0.0815483	1
con	1	8	17	Thu	LR	UL	19	74.1385	66.3655	140.504			901		-0.0553223	74.1385	66.3655	140.504	-0.0553223	2
con	1	8	18	Thu	LL	LR	26	53.6668	30.9107	84.5775			905		-0.269057	53.6668	30.9107	84.5775	-0.269057	3
con	1	8	19	Thu	UL	UR	38	91.8239	103.878	195.702			909		0.0615936	91.8239	103.878	195.702	0.0615936	4
con	1	8	20	Thu	LR	LL	41	55.6703	65.9947	121.665			913		0.084859	55.6703	65.9947	121.665	0.084859	5
con	1	8	21	Fri	UR	UL	14	79.2299	90.6073	169.837			921		0.0669901	41.9491	35.0834	77.0325	-0.0891268	1
od	2	8	1	Mon	LL	UL	25	64.2022	59.3675	123.57			945		-0.0391252	64.2022	59.3675	123.57	-0.0391252	1
od	2	8	2	Mon	LL	UL	20	90.835	73.2325	164.068			949		-0.107289	90.835	73.2325	164.068	-0.107289	2
od	2	8	3	Mon	LL	UL	5	154.06	52.6916	206.751			953		-0.49029	154.06	52.6916	206.751	-0.49029	3
od	2	8	4	Mon	LL	UL	29	66.3414	33.9737	100.315			957		-0.32266	66.3414	33.9737	100.315	-0.32266	4
od	2	8	5	Mon	LL	UL	10	58.6089	28.1218	86.7308			961		-0.351514	58.6089	28.1218	86.7308	-0.351514	5
od	2	8	6	Tue	LL	UL	17	67.109	35.2592	102.368			985		-0.31113	67.109	35.2592	102.368	-0.31113	1
od	2	8	7	Tue	LL	UL	37	93.1254	82.682	175.807			989		-0.0594023	93.1254	82.682	175.807	-0.0594023	2
od	2	8	8	Tue	LL	UL	35	90.4048	101.505	191.91			993		0.0578431	90.4048	101.505	191.91	0.0578431	3
od	2	8	9	Tue	LL	UL	6	125.537	61.3311	186.869			997		-0.343591	125.537	61.3311	186.869	-0.343591	4
od	2	8	10	Tue	LL	UL	16	92.7983	139.167	231.965			1001		0.199895	92.7983	139.167	231.965	0.199895	5
od	2	8	11	Wed	LL	UL	11	88.5379	49.3063	137.844			1025		-0.284608	88.5379	49.3063	137.844	-0.284608	1
od	2	8	12	Wed	LL	UL	22	22.6811	39.4956	62.1767			1029		0.270432	22.6811	39.4956	62.1767	0.270432	2
od	2	8	13	Wed	LL	UL	24	21.5128	17.456	38.9688			1033		-0.104102	21.5128	17.456	38.9688	-0.104102	3
od	2	8	14	Wed	LL	UL	9	117.077	56.8553	173.933			1037		-0.346238	117.077	56.8553	173.933	-0.346238	4
od	2	8	15	Wed	LL	UL	39	84.4702	66.7429	151.213			1041		-0.117234	84.4702	66.7429	151.213	-0.117234	5
od	2	8	16	Thu	LL	UL	15	42.3419	62.8381	105.18			1065		0.194868	42.3419	62.8381	105.18	0.194868	1
od	2	8	17	Thu	LL	UL	4	80.0831	96.1096	176.193			1069		0.0909605	80.0831	96.1096	176.193	0.0909605	2
od	2	8	18	Thu	LL	UL	12	42.1352	185.008	227.143			1073		0.628999	42.1352	185.008	227.143	0.628999	3
od	2	8	19	Thu	LL	UL	30	79.7077	42.0519	121.76			1077		-0.309264	79.7077	42.0519	121.76	-0.309264	4
od	2	8	20	Thu	LL	UL	38	45.8792	63.504	109.383			1081		0.161129	45.8792	63.504	109.383	0.161129	5
od	2	8	21	Fri	LL	LR	40	75.5838	60.0059	135.59			1089		-0.11489	45.098	33.578	78.676	-0.146424	1
or	3	8	1	Mon	UR	LR	36	83.478	108.671	192.149			1113		0.13111	83.478	108.671	192.149	0.13111	1
or	3	8	2	Mon	UR	LL	16	75.5376	78.666	154.204			1117		0.0202872	75.5376	78.666	154.204	0.0202872	2
or	3	8	3	Mon	UR	UL	21	54.226	56.488	110.714			1121		0.0204312	54.226	56.488	110.714	0.0204312	3
or	3	8	4	Mon	UR	UL	39	59.047	88.9821	148.029			1125		0.202224	59.047	88.9821	148.029	0.202224	4
or	3	8	5	Mon	UR	LL	6	127.904	96.2649	224.169			1129		-0.141141	127.904	96.2649	224.169	-0.141141	5
or	3	8	6	Tue	UR	LL	11	84.3013	46.5613	130.863			1153		-0.288394	84.3013	46.5613	130.863	-0.288394	1
or	3	8	7	Tue	UR	UL	34	35.6553	38.3254	73.9807			1157		0.0360919	35.6553	38.3254	73.9807	0.0360919	2
or	3	8	8	Tue	UR	LL	2	40.6749	23.1464	63.8213			1161		-0.27465	40.6749	23.1464	63.8213	-0.27465	3
or	3	8	9	Tue	UR	LR	32	84.8283	118.885	203.713			1165		0.167179	84.8283	118.885	203.713	0.167179	4
or	3	8	10	Tue	UR	UL	38	62.9261	69.5222	132.448			1169		0.0498006	62.9261	69.5222	132.448	0.0498006	5
or	3	8	11	Wed	UR	UL	35	87.7919	95.9331	183.725			1193		0.0443118	87.7919	95.9331	183.725	0.0443118	1
or	3	8	12	Wed	UR	LR	23	86.115	70.3422	156.457			1197		-0.100812	86.115	70.3422	156.457	-0.100812	2
or	3	8	13	Wed	UR	LL	18	37.8963	103.555	141.451			1201		0.46418	37.8963	103.555	141.451	0.46418	3
or	3	8	14	Wed	UR	UL	3	37.2764	58.8372	96.1136			1205		0.224326	37.2764	58.8372	96.1136	0.224326	4
or	3	8	15	Wed	UR	LL	33	131.315	101.624	232.939			1209		-0.127463	131.315	101.624	232.939	-0.127463	5
or	3	8	16	Thu	UR	LL	8	55.0116	89.1431	144.155			1233		0.23677	55.0116	89.1431	144.155	0.23677	1
or	3	8	17	Thu	UR	UL	15	46.0631	57.3577	103.421			1237		0.10921	46.0631	57.3577	103.421	0.10921	2
or	3	8	18	Thu	UR	UL	29	26.0496	94.7289	120.778			1241		0.568639	26.0496	94.7289	120.778	0.568639	3
or	3	8	19	Thu	UR	LL	19	35.9709	108.545	144.516			1245		0.502186	35.9709	108.545	144.516	0.502186	4
or	3	8	20	Thu	UR	LR	17	38.9412	121.789	160.73			1249		0.515445	38.9412	121.789	160.73	0.515445	5
or	3	8	21	Fri	UR	LR	30	65.7074	100.193	165.9			1257		0.207869	31.3572	51.469	82.8262	0.24282	1
or	1	101	1	Mon	LL	UL	32	31.0462	49.9906	81.0369			1		0.233775	31.0462	49.9906	81.0369	0.233775	1
or	1	101	2	Mon	LL	LR	34	38.8591	46.8078	85.667			5		0.0927858	38.8591	46.8078	85.667	0.0927858	2
or	1	101	3	Mon	LL	UR	7	20.5949	35.8773	56.4722			9		0.270617	20.5949	35.8773	56.4722	0.270617	3
or	1	101	4	Mon	LL	UL	36	55.1663	57.2046	112.371			13		0.0181394	55.1663	57.2046	112.371	0.0181394	4
or	1	101	5	Mon	LL	LR	31	81.292	82.6485	163.941			17		0.0082744	81.292	82.6485	163.941	0.0082744	5
or	1	101	6	Tue	LL	UR	2	26.5029	16.5769	43.0798			41		-0.230408	26.5029	16.5769	43.0798	-0.230408	1
or	1	101	7	Tue	LL	LR	33	37.8599	58.1268	95.9867			45		0.211142	37.8599	58.1268	95.9867	0.211142	2
or	1	101	8	Tue	LL	UL	24	31.9184	29.588	61.5065			49		-0.0378888	31.9184	29.588	61.5065	-0.0378888	3
or	1	101	9	Tue	LL	UL	8	22.1566	21.7002	43.8568			53		-0.0104072	22.1566	21.7002	43.8568	-0.0104072	4
or	1	101	10	Tue	LL	LR	18	36.4916	78.2003	114.692			57		0.363659	36.4916	78.2003	114.692	0.363659	5
or	1	101	11	Wed	LL	LR	12	16.4904	27.4798	43.9702			81		0.249929	16.4904	27.4798	43.9702	0.249929	1
or	1	101	12	Wed	LL	UR	3	14.4869	49.1315	63.6184			85		0.544569	14.4869	49.1315	63.6184	0.544569	2
or	1	101	13	Wed	LL	UL	4	44.2486	45.4126	89.6612			89		0.0129819	44.2486	45.4126	89.6612	0.0129819	3
or	1	101	14	Wed	LL	LR	13	35.7531	27.2125	62.9656			93		-0.13564	35.7531	27.2125	62.9656	-0.13564	4
or	1	101	15	Wed	LL	UL	9	27.8797	42.3157	70.1954			97		0.205655	27.8797	42.3157	70.1954	0.205655	5
or	1	101	16	Thu	LL	UL	1	19.4117	8.97163	28.3833			121		-0.367824	19.4117	8.97163	28.3833	-0.367824	1
or	1	101	17	Thu	LL	LR	19	30.1915	51.5283	81.7198			125		0.261098	30.1915	51.5283	81.7198	0.261098	2
or	1	101	18	Thu	LL	LR	26	45.3688	34.0493	79.4181			129		-0.14253	45.3688	34.0493	79.4181	-0.14253	3
or	1	101	19	Thu	LL	UL	1	56.9498	20.1996	77.1493			133		-0.476352	56.9498	20.1996	77.1493	-0.476352	4
or	1	101	20	Thu	LL	UR	41	35.2033	29.5958	64.7991			137		-0.0865369	35.2033	29.5958	64.7991	-0.0865369	5
or	1	101	21	Fri	LL	UR	14	65.4038	64.5461	129.95			161		-0.00660009	19.1749	30.0723	49.2471	0.22128	1
od	2	101	1	Mon	LR	UL	25	24.1913	31.1494	55.3408			169		0.125733	24.1913	31.1494	55.3408	0.125733	1
od	2	101	2	Mon	LR	UL	20	25.6127	37.6098	63.2224			173		0.18976	25.6127	37.6098	63.2224	0.18976	2
od	2	101	3	Mon	LR	UL	5	76.767	119.691	196.458			177		0.21849	76.767	119.691	196.458	0.21849	3
od	2	101	4	Mon	LR	UL	29	24.7618	67.33	92.0918			181		0.462237	24.7618	67.33	92.0918	0.462237	4
od	2	101	5	Mon	LR	UL	10	15.2069	25.9793	41.1862			185		0.261551	15.2069	25.9793	41.1862	0.261551	5
od	2	101	6	Tue	LR	UL	17	14.3827	18.6201	33.0028			209		0.128394	14.3827	18.6201	33.0028	0.128394	1
od	2	101	7	Tue	LR	UL	37	41.5207	63.1382	104.659			213		0.206552	41.5207	63.1382	104.659	0.206552	2
od	2	101	8	Tue	LR	UL	35	78.2089	59.779	137.988			217		-0.133561	78.2089	59.779	137.988	-0.133561	3
od	2	101	9	Tue	LR	UL	6	12.6378	31.3348	43.9725			221		0.425197	12.6378	31.3348	43.9725	0.425197	4
od	2	101	10	Tue	LR	UL	16	32.733	75.5608	108.294			225		0.395478	32.733	75.5608	108.294	0.395478	5
od	2	101	11	Wed	LR	UL	11	11.185	26.9052	38.0901			249		0.412712	11.185	26.9052	38.0901	0.412712	1
od	2	101	12	Wed	LR	UL	22	19.8859	33.9936	53.8795			253		0.261837	19.8859	33.9936	53.8795	0.261837	2
od	2	101	13	Wed	LR	UL	24	16.71	58.4198	75.1298			257		0.555169	16.71	58.4198	75.1298	0.555169	3
od	2	101	14	Wed	LR	UL	9	31.546	29.9631	61.5091			261		-0.0257357	31.546	29.9631	61.5091	-0.0257357	4
od	2	101	15	Wed	LR	UL	1	21.854	82.7036	104.558			265		0.581972	21.854	82.7036	104.558	0.581972	5
od	2	101	16	Thu	LR	UL	15	23.8075	49.362	73.1695			289		0.34925	23.8075	49.362	73.1695	0.34925	1
od	2	101	17	Thu	LR	UL	4	33.1086	67.7868	100.895			293		0.343704	33.1086	67.7868	100.895	0.343704	2
od	2	101	18	Thu	LR	UL	12	118.267	82.0482	200.315			297		-0.180809	118.267	82.0482	200.315	-0.180809	3
od	2	101	19	Thu	LR	UL	30	67.2563	21.2767	88.533			301		-0.51935	67.2563	21.2767	88.533	-0.51935	4
od	2	101	20	Thu	LR	UL	1	22.9317	13.5469	36.4786			305		-0.257267	22.9317	13.5469	36.4786	-0.257267	5
od	2	101	21	Fri	LR	LL	1	29.2851	55.8194	85.1045			329		0.311785	18.4423	33.0625	51.5048	0.28386	1
con	3	101	1	Mon	UR	LL	36	30.1482	27.1902	57.3384			337		-0.0515891	30.1482	27.1902	57.3384	-0.0515891	1
con	3	101	2	Mon	UR	UL	16	51.9193	39.1592	91.0785			341		-0.140101	51.9193	39.1592	91.0785	-0.140101	2
con	3	101	3	Mon	UR	LR	21	20.1831	27.998	48.1812			345		0.162198	20.1831	27.998	48.1812	0.162198	3
con	3	101	4	Mon	UL	LL	1	40.2756	96.1192	136.395			349		0.409426	40.2756	96.1192	136.395	0.409426	4
con	3	101	5	Mon	LR	UR	6	25.2646	26.3228	51.5874			353		0.0205131	25.2646	26.3228	51.5874	0.0205131	5
con	3	101	6	Tue	LR	UL	11	32.9521	43.6499	76.602			377		0.139654	32.9521	43.6499	76.602	0.139654	1
con	3	101	7	Tue	LL	UL	34	30.0898	48.3303	78.4201			381		0.2326	30.0898	48.3303	78.4201	0.2326	2
con	3	101	8	Tue	LR	LL	2	12.4673	22.9809	35.4482			385		0.29659	12.4673	22.9809	35.4482	0.29659	3
con	3	101	9	Tue	UL	LR	32	102.343	50.9942	153.337			389		-0.334874	102.343	50.9942	153.337	-0.334874	4
con	3	101	10	Tue	LL	UR	1	46.2945	18.7796	65.0741			393		-0.422825	46.2945	18.7796	65.0741	-0.422825	5
con	3	101	11	Wed	LR	UL	35	32.6381	15.121	47.7591			417		-0.366779	32.6381	15.121	47.7591	-0.366779	1
con	3	101	12	Wed	LR	LL	23	46.3866	54.2479	100.635			421		0.0781168	46.3866	54.2479	100.635	0.0781168	2
con	3	101	13	Wed	LL	UL	18	19.3621	86.1571	105.519			425		0.633013	19.3621	86.1571	105.519	0.633013	3
con	3	101	14	Wed	UR	UL	3	17.3811	22.6772	40.0583			429		0.132211	17.3811	22.6772	40.0583	0.132211	4
con	3	101	15	Wed	LR	LL	33	53.0475	87.9723	141.02			433		0.247659	53.0475	87.9723	141.02	0.247659	5
con	3	101	16	Thu	UR	LR	8	22.9136	50.2047	73.1183			457		0.373245	22.9136	50.2047	73.1183	0.373245	1
con	3	101	17	Thu	UR	LL	15	13.9849	61.9714	75.9563			461		0.631765	13.9849	61.9714	75.9563	0.631765	2
con	3	101	18	Thu	UR	UL	29	59.4199	43.3763	102.796			465		-0.156071	59.4199	43.3763	102.796	-0.156071	3
con	3	101	19	Thu	LL	LR	19	113.977	29.5885	143.565			469		-0.587804	113.977	29.5885	143.565	-0.587804	4
con	3	101	20	Thu	UR	UL	17	2.19929	13.5146	15.7139			473		0.720083	2.19929	13.5146	15.7139	0.720083	5
con	3	101	21	Fri	LL	LR	30	72.4758	41.4096	113.885			497		-0.272785	33.1723	28.7656	61.9379	-0.0711466	1
or	1	102	1	Mon	UR	LR	32	52.9808	50.9574	103.938			2		-0.0194679	52.9808	50.9574	103.938	-0.0194679	1
or	1	102	2	Mon	UR	LL	34	38.4206	69.0418	107.462			6		0.284948	38.4206	69.0418	107.462	0.284948	2
or	1	102	3	Mon	UR	UL	7	5.79872	30.4852	36.284			10		0.68037	5.79872	30.4852	36.284	0.68037	3
or	1	102	4	Mon	UR	LL	36	12.9914	82.1504	95.1419			14		0.726904	12.9914	82.1504	95.1419	0.726904	4
or	1	102	5	Mon	UR	LR	31	66.7755	127.717	194.492			18		0.313335	66.7755	127.717	194.492	0.313335	5
or	1	102	6	Tue	UR	LL	2	10.888	19.1619	30.05			42		0.275338	10.888	19.1619	30.05	0.275338	1
or	1	102	7	Tue	UR	UL	33	60.813	99.6042	160.417			46		0.241815	60.813	99.6042	160.417	0.241815	2
or	1	102	8	Tue	UR	LR	24	35.3893	32.3013	67.6906			50		-0.0456192	35.3893	32.3013	67.6906	-0.0456192	3
or	1	102	9	Tue	UR	LR	8	1.29993	17.1969	18.4969			54		0.859443	1.29993	17.1969	18.4969	0.859443	4
or	1	102	10	Tue	UR	LL	18	15.3878	40.8726	56.2604			58		0.45298	15.3878	40.8726	56.2604	0.45298	5
or	1	102	11	Wed	UR	UL	12	5.49608	39.3402	44.8362			82		0.754838	5.49608	39.3402	44.8362	0.754838	1
or	1	102	12	Wed	UR	LR	3	23.7486	36.1782	59.9268			86		0.207415	23.7486	36.1782	59.9268	0.207415	2
or	1	102	13	Wed	UR	LL	4	76.9361	99.8647	176.801			90		0.129686	76.9361	99.8647	176.801	0.129686	3
or	1	102	14	Wed	UR	LR	13	16.1864	36.5619	52.7483			94		0.386278	16.1864	36.5619	52.7483	0.386278	4
or	1	102	15	Wed	UR	LL	9	0	68.5349	68.5349			98		1	0	68.5349	68.5349	1	5
or	1	102	16	Thu	UR	LL	1	16.9998	17.5467	34.5465			122		0.0158329	16.9998	17.5467	34.5465	0.0158329	1
or	1	102	17	Thu	UR	LR	19	36.3785	25.3054	61.6839			126		-0.179513	36.3785	25.3054	61.6839	-0.179513	2
or	1	102	18	Thu	UR	LR	26	4.41234	33.4192	37.8316			130		0.766738	4.41234	33.4192	37.8316	0.766738	3
or	1	102	19	Thu	UR	LL	1	23.9418	49.9551	73.8969			134		0.352021	23.9418	49.9551	73.8969	0.352021	4
or	1	102	20	Thu	UR	UL	41	2.69961	17.4939	20.1935			138		0.732626	2.69961	17.4939	20.1935	0.732626	5
or	1	102	21	Fri	UR	UL	14	36.371	79.7319	116.103			162		0.373469	21.3376	42.9786	64.3162	0.336478	1
con	2	102	1	Mon	LR	LL	25	19.9508	38.9563	58.9072			170		0.322635	19.9508	38.9563	58.9072	0.322635	1
con	2	102	2	Mon	LR	UL	20	33.2608	44.9591	78.2199			174		0.149557	33.2608	44.9591	78.2199	0.149557	2
con	2	102	3	Mon	UR	LR	5	48.6272	161.704	210.331			178		0.537614	48.6272	161.704	210.331	0.537614	3
con	2	102	4	Mon	UR	UL	29	70.5334	36.7914	107.325			182		-0.314391	70.5334	36.7914	107.325	-0.314391	4
con	2	102	5	Mon	LR	LL	10	41.5774	36.9681	78.5455			186		-0.058684	41.5774	36.9681	78.5455	-0.058684	5
con	2	102	6	Tue	LL	UL	17	15.7517	8.00849	23.7601			210		-0.325889	15.7517	8.00849	23.7601	-0.325889	1
con	2	102	7	Tue	UR	LL	37	46.1235	85.0343	131.158			214		0.296672	46.1235	85.0343	131.158	0.296672	2
con	2	102	8	Tue	UR	UL	35	82.5674	86.6405	169.208			218		0.0240721	82.5674	86.6405	169.208	0.0240721	3
con	2	102	9	Tue	LL	LR	6	50.9608	24.8813	75.8421			222		-0.343866	50.9608	24.8813	75.8421	-0.343866	4
con	2	102	10	Tue	UL	UR	16	82.5592	38.9311	121.49			226		-0.359108	82.5592	38.9311	121.49	-0.359108	5
con	2	102	11	Wed	LR	LL	11	13.9443	30.0862	44.0305			250		0.366608	13.9443	30.0862	44.0305	0.366608	1
con	2	102	12	Wed	UR	LL	22	12.6735	16.9281	29.6016			254		0.143729	12.6735	16.9281	29.6016	0.143729	2
con	2	102	13	Wed	UR	LR	24	8.47298	13.5785	22.0515			258		0.231527	8.47298	13.5785	22.0515	0.231527	3
con	2	102	14	Wed	LL	LR	9	55.9082	50.7869	106.695			262		-0.0479995	55.9082	50.7869	106.695	-0.0479995	4
con	2	102	15	Wed	UL	UR	1	47.7859	16.8615	64.6474			266		-0.478355	47.7859	16.8615	64.6474	-0.478355	5
con	2	102	16	Thu	LL	UL	15	23.2997	37.936	61.2357			290		0.239016	23.2997	37.936	61.2357	0.239016	1
con	2	102	17	Thu	LR	UL	4	41.4257	117.458	158.884			294		0.478541	41.4257	117.458	158.884	0.478541	2
con	2	102	18	Thu	UL	LL	12	16.2636	51.79	68.0536			298		0.522035	16.2636	51.79	68.0536	0.522035	3
con	2	102	19	Thu	UR	LR	30	12.6017	12.4199	25.0216			302		-0.0072664	12.6017	12.4199	25.0216	-0.0072664	4
con	2	102	20	Thu	UR	UL	1	38.898	31.8026	70.7006			306		-0.100359	38.898	31.8026	70.7006	-0.100359	5
con	2	102	21	Fri	LR	LL	1	63.8632	62.5384	126.402			330		-0.0104806	29.4118	33.5983	63.0101	0.0664428	1
od	3	102	1	Mon	LL	LR	36	56.0588	31.1512	87.21			338		-0.285604	56.0588	31.1512	87.21	-0.285604	1
od	3	102	2	Mon	LL	LR	16	71.6462	59.7203	131.367			342		-0.0907832	71.6462	59.7203	131.367	-0.0907832	2
od	3	102	3	Mon	LL	LR	21	21.67	18.5863	40.2564			346		-0.076601	21.67	18.5863	40.2564	-0.076601	3
od	3	102	4	Mon	LL	LR	1	56.0691	30.4146	86.4837			350		-0.296641	56.0691	30.4146	86.4837	-0.296641	4
od	3	102	5	Mon	LL	LR	6	37.905	43.9357	81.8407			354		0.0736877	37.905	43.9357	81.8407	0.0736877	5
od	3	102	6	Tue	LL	LR	11	26.561	34.1096	60.6707			378		0.124419	26.561	34.1096	60.6707	0.124419	1
od	3	102	7	Tue	LL	LR	34	25.3694	11.5578	36.9271			382		-0.374024	25.3694	11.5578	36.9271	-0.374024	2
od	3	102	8	Tue	LL	LR	2	19.8323	7.80116	27.6335			386		-0.435383	19.8323	7.80116	27.6335	-0.435383	3
od	3	102	9	Tue	LL	LR	32	129.925	125.764	255.688			390		-0.0162731	129.925	125.764	255.688	-0.0162731	4
od	3	102	10	Tue	LL	LR	1	45.1301	8.52947	53.6595			394		-0.682089	45.1301	8.52947	53.6595	-0.682089	5
od	3	102	11	Wed	LL	LR	35	35.6127	31.5197	67.1325			418		-0.0609685	35.6127	31.5197	67.1325	-0.0609685	1
od	3	102	12	Wed	LL	LR	23	52.9322	23.7996	76.7317			422		-0.379668	52.9322	23.7996	76.7317	-0.379668	2
od	3	102	13	Wed	LL	LR	18	32.6584	26.2068	58.8653			426		-0.1096	32.6584	26.2068	58.8653	-0.1096	3
od	3	102	14	Wed	LL	LR	3	29.7484	7.19083	36.9392			430		-0.610667	29.7484	7.19083	36.9392	-0.610667	4
od	3	102	15	Wed	LL	LR	33	61.889	0	61.889			434		-1	61.889	0	61.889	-1	5
od	3	102	16	Thu	LL	LR	8	36.9813	20.8422	57.8235			458		-0.27911	36.9813	20.8422	57.8235	-0.27911	1
od	3	102	17	Thu	LL	LR	15	55.6654	25.8237	81.4891			462		-0.366205	55.6654	25.8237	81.4891	-0.366205	2
od	3	102	18	Thu	LL	LR	29	39.5795	8.09995	47.6794			466		-0.660233	39.5795	8.09995	47.6794	-0.660233	3
od	3	102	19	Thu	LL	LR	19	76.1982	10.8899	87.088			470		-0.749911	76.1982	10.8899	87.088	-0.749911	4
od	3	102	20	Thu	LL	LR	17	15.0949	3.60071	18.6956			474		-0.614806	15.0949	3.60071	18.6956	-0.614806	5
od	3	102	21	Fri	LL	UR	30	92.7747	52.3266	145.101			498		-0.278758	38.2061	32.0646	70.2707	-0.0873974	1
con	1	103	1	Mon	LL	UL	32	70.9436	40.282	111.226			3		-0.27567	70.9436	40.282	111.226	-0.27567	1
con	1	103	2	Mon	LR	UL	34	44.0055	65.7568	109.762			7		0.198167	44.0055	65.7568	109.762	0.198167	2
con	1	103	3	Mon	UR	UL	7	24.4451	30.5984	55.0435			11		0.111789	24.4451	30.5984	55.0435	0.111789	3
con	1	103	4	Mon	LR	LL	36	46.6886	101.137	147.826			15		0.36833	46.6886	101.137	147.826	0.36833	4
con	1	103	5	Mon	LR	UR	31	106.687	63.4507	170.137			19		-0.254124	106.687	63.4507	170.137	-0.254124	5
con	1	103	6	Tue	LR	LL	2	10.6932	25.2893	35.9825			43		0.405645	10.6932	25.2893	35.9825	0.405645	1
con	1	103	7	Tue	UR	LL	33	25.7904	80.693	106.483			47		0.515598	25.7904	80.693	106.483	0.515598	2
con	1	103	8	Tue	UR	LR	24	9.39117	16.8014	26.1926			51		0.282913	9.39117	16.8014	26.1926	0.282913	3
con	1	103	9	Tue	UL	UR	8	35.7918	17.8653	53.6571			55		-0.334093	35.7918	17.8653	53.6571	-0.334093	4
con	1	103	10	Tue	LL	LR	18	45.2359	52.407	97.6429			59		0.0734429	45.2359	52.407	97.6429	0.0734429	5
con	1	103	11	Wed	LL	UL	12	18.2655	10.2986	28.5641			83		-0.278912	18.2655	10.2986	28.5641	-0.278912	1
con	1	103	12	Wed	UR	LR	3	24.7206	17.8016	42.5222			87		-0.162716	24.7206	17.8016	42.5222	-0.162716	2
con	1	103	13	Wed	UR	LL	4	67.6139	57.2243	124.838			91		-0.0832247	67.6139	57.2243	124.838	-0.0832247	3
con	1	103	14	Wed	LR	LL	13	27.9491	42.108	70.0571			95		0.202105	27.9491	42.108	70.0571	0.202105	4
con	1	103	15	Wed	UL	UR	9	63.2092	40.1245	103.334			99		-0.223399	63.2092	40.1245	103.334	-0.223399	5
con	1	103	16	Thu	UR	UL	1	9.39176	25.9489	35.3407			123		0.468502	9.39176	25.9489	35.3407	0.468502	1
con	1	103	17	Thu	LR	UL	19	21.1934	36.6368	57.8303			127		0.267046	21.1934	36.6368	57.8303	0.267046	2
con	1	103	18	Thu	LL	LR	26	40.5855	9.17547	49.761			131		-0.631218	40.5855	9.17547	49.761	-0.631218	3
con	1	103	19	Thu	UL	UR	1	70.0574	27.2802	97.3375			135		-0.439473	70.0574	27.2802	97.3375	-0.439473	4
con	1	103	20	Thu	LR	LL	41	5.28894	9.18674	14.4757			139		0.269265	5.28894	9.18674	14.4757	0.269265	5
con	1	103	21	Fri	UR	UL	14	44.3359	75.1975	119.533			163		0.258184	12.8178	54.8516	67.6694	0.621164	1
od	2	103	1	Mon	UR	UL	25	14.8014	34.69	49.4915			171		0.401859	14.8014	34.69	49.4915	0.401859	1
od	2	103	2	Mon	UR	UL	20	10.34	33.8242	44.1642			175		0.531747	10.34	33.8242	44.1642	0.531747	2
od	2	103	3	Mon	UR	UL	5	101.329	104.937	206.266			179		0.0174932	101.329	104.937	206.266	0.0174932	3
od	2	103	4	Mon	UR	UL	29	10.1494	24.5284	34.6778			183		0.414645	10.1494	24.5284	34.6778	0.414645	4
od	2	103	5	Mon	UR	UL	10	21.5415	79.6413	101.183			187		0.574206	21.5415	79.6413	101.183	0.574206	5
od	2	103	6	Tue	UR	UL	17	5.21587	24.2661	29.482			211		0.646166	5.21587	24.2661	29.482	0.646166	1
od	2	103	7	Tue	UR	UL	37	49.2754	138.083	187.358			215		0.473999	49.2754	138.083	187.358	0.473999	2
od	2	103	8	Tue	UR	UL	35	54.3455	111.185	165.53			219		0.343378	54.3455	111.185	165.53	0.343378	3
od	2	103	9	Tue	UR	UL	6	126.023	88.5718	214.595			223		-0.17452	126.023	88.5718	214.595	-0.17452	4
od	2	103	10	Tue	UR	UL	16	22.4991	91.1323	113.631			227		0.603999	22.4991	91.1323	113.631	0.603999	5
od	2	103	11	Wed	UR	UL	11	4.58851	67.0977	71.6862			251		0.871983	4.58851	67.0977	71.6862	0.871983	1
od	2	103	12	Wed	UR	UL	22	11.6716	20.601	32.2726			255		0.276686	11.6716	20.601	32.2726	0.276686	2
od	2	103	13	Wed	UR	UL	24	8.63501	12.2442	20.8792			259		0.172859	8.63501	12.2442	20.8792	0.172859	3
od	2	103	14	Wed	UR	UL	9	22.6664	94.2501	116.916			263		0.612264	22.6664	94.2501	116.916	0.612264	4
od	2	103	15	Wed	UR	UL	1	38.4912	34.1564	72.6476			267		-0.0596689	38.4912	34.1564	72.6476	-0.0596689	5
od	2	103	16	Thu	UR	UL	15	15.0329	38.1797	53.2126			291		0.434988	15.0329	38.1797	53.2126	0.434988	1
od	2	103	17	Thu	UR	UL	4	37.2156	88.5755	125.791			295		0.408295	37.2156	88.5755	125.791	0.408295	2
od	2	103	18	Thu	UR	UL	12	87.365	45.6977	133.063			299		-0.31314	87.365	45.6977	133.063	-0.31314	3
od	2	103	19	Thu	UR	UL	30	28.0626	74.469	102.532			303		0.452606	28.0626	74.469	102.532	0.452606	4
od	2	103	20	Thu	UR	UL	1	8.62646	47.6504	56.2769			307		0.693428	8.62646	47.6504	56.2769	0.693428	5
od	2	103	21	Fri	UR	LL	1	24.4558	33.307	57.7629			331		0.153233	10.4263	18.0121	28.4385	0.266744	1
or	3	103	1	Mon	UL	LR	36	30.7923	29.6579	60.4502			339		-0.0187667	30.7923	29.6579	60.4502	-0.0187667	1
or	3	103	2	Mon	UL	LL	16	39.403	57.6135	97.0165			343		0.187705	39.403	57.6135	97.0165	0.187705	2
or	3	103	3	Mon	UL	UR	21	30.5456	22.9529	53.4985			347		-0.141923	30.5456	22.9529	53.4985	-0.141923	3
or	3	103	4	Mon	UL	LR	1	73.9351	70.9179	144.853			351		-0.0208295	73.9351	70.9179	144.853	-0.0208295	4
or	3	103	5	Mon	UL	LL	6	0	90.7458	90.7458			355		1	0	90.7458	90.7458	1	5
or	3	103	6	Tue	UL	UR	11	81.9138	22.7875	104.701			379		-0.564715	81.9138	22.7875	104.701	-0.564715	1
or	3	103	7	Tue	UL	LR	34	16.9927	31.5126	48.5053			383		0.299348	16.9927	31.5126	48.5053	0.299348	2
or	3	103	8	Tue	UL	LL	2	15.9005	19.2921	35.1926			387		0.0963718	15.9005	19.2921	35.1926	0.0963718	3
or	3	103	9	Tue	UL	LR	32	108.338	99.9544	208.293			391		-0.0402514	108.338	99.9544	208.293	-0.0402514	4
or	3	103	10	Tue	UL	LL	1	126.625	9.08376	135.709			395		-0.866129	126.625	9.08376	135.709	-0.866129	5
or	3	103	11	Wed	UL	LL	35	19.8495	15.6486	35.4981			419		-0.118343	19.8495	15.6486	35.4981	-0.118343	1
or	3	103	12	Wed	UL	UR	23	67.7061	22.3039	90.01			423		-0.504412	67.7061	22.3039	90.01	-0.504412	2
or	3	103	13	Wed	UL	LR	18	41.1855	32.931	74.1165			427		-0.111373	41.1855	32.931	74.1165	-0.111373	3
or	3	103	14	Wed	UL	LR	3	30.1761	5.56677	35.7429			431		-0.68851	30.1761	5.56677	35.7429	-0.68851	4
or	3	103	15	Wed	UL	LL	33	84.8809	112.223	197.104			435		0.138718	84.8809	112.223	197.104	0.138718	5
or	3	103	16	Thu	UL	LL	8	18.7085	28.4894	47.1979			459		0.20723	18.7085	28.4894	47.1979	0.20723	1
or	3	103	17	Thu	UL	LR	15	40.2187	18.3596	58.5783			463		-0.373161	40.2187	18.3596	58.5783	-0.373161	2
or	3	103	18	Thu	UL	LL	29	18.6993	26.379	45.0783			467		0.170363	18.6993	26.379	45.0783	0.170363	3
or	3	103	19	Thu	UL	LR	19	54.0762	42.0358	96.112			471		-0.125275	54.0762	42.0358	96.112	-0.125275	4
or	3	103	20	Thu	UL	UR	17	15.2614	10.1957	25.457			475		-0.19899	15.2614	10.1957	25.457	-0.19899	5
or	3	103	21	Fri	UL	UR	30	58.322	76.2762	134.598			499		0.133391	28.0731	12.4193	40.4924	-0.386587	1
od	1	104	1	Mon	UL	UR	32	71.9703	34.6824	106.653			4		-0.34962	71.9703	34.6824	106.653	-0.34962	1
od	1	104	2	Mon	UL	UR	34	59.9791	25.4154	85.3945			8		-0.404753	59.9791	25.4154	85.3945	-0.404753	2
od	1	104	3	Mon	UL	UR	7	34.7869	11.5946	46.3815			12		-0.500033	34.7869	11.5946	46.3815	-0.500033	3
od	1	104	4	Mon	UL	UR	36	73.643	64.39	138.033			16		-0.0670346	73.643	64.39	138.033	-0.0670346	4
od	1	104	5	Mon	UL	UR	31	102.495	63.0234	165.518			20		-0.238473	102.495	63.0234	165.518	-0.238473	5
od	1	104	6	Tue	UL	UR	2	12.183	7.89347	20.0765			44		-0.21366	12.183	7.89347	20.0765	-0.21366	1
od	1	104	7	Tue	UL	UR	33	80.32	35.0426	115.363			48		-0.392479	80.32	35.0426	115.363	-0.392479	2
od	1	104	8	Tue	UL	UR	24	35.0939	21.4825	56.5764			52		-0.240586	35.0939	21.4825	56.5764	-0.240586	3
od	1	104	9	Tue	UL	UR	8	42.0407	17.796	59.8367			56		-0.40518	42.0407	17.796	59.8367	-0.40518	4
od	1	104	10	Tue	UL	UR	18	35.2767	19.6842	54.961			60		-0.283701	35.2767	19.6842	54.961	-0.283701	5
od	1	104	11	Wed	UL	UR	12	52.8602	91.2957	144.156			84		0.266624	52.8602	91.2957	144.156	0.266624	1
od	1	104	12	Wed	UL	UR	3	18.0976	20.1633	38.2608			88		0.0539896	18.0976	20.1633	38.2608	0.0539896	2
od	1	104	13	Wed	UL	UR	4	88.0661	49.1257	137.192			92		-0.283839	88.0661	49.1257	137.192	-0.283839	3
od	1	104	14	Wed	UL	UR	13	18.2333	14.5008	32.7341			96		-0.114026	18.2333	14.5008	32.7341	-0.114026	4
od	1	104	15	Wed	UL	UR	9	53.4115	18.06	71.4715			100		-0.494624	53.4115	18.06	71.4715	-0.494624	5
od	1	104	16	Thu	UL	UR	1	20.9138	6.58874	27.5026			124		-0.520864	20.9138	6.58874	27.5026	-0.520864	1
od	1	104	17	Thu	UL	UR	19	43.3073	21.0489	64.3563			128		-0.345862	43.3073	21.0489	64.3563	-0.345862	2
od	1	104	18	Thu	UL	UR	26	32.0552	10.797	42.8522			132		-0.496083	32.0552	10.797	42.8522	-0.496083	3
od	1	104	19	Thu	UL	UR	1	27.167	19.3456	46.5126			136		-0.168156	27.167	19.3456	46.5126	-0.168156	4
od	1	104	20	Thu	UL	UR	41	31.088	4.10236	35.1904			140		-0.766847	31.088	4.10236	35.1904	-0.766847	5
od	1	104	21	Fri	UL	LR	14	67.101	45.5433	112.644			164		-0.191379	25.8032	17.0903	42.8935	-0.203128	1
or	2	104	1	Mon	LR	LL	25	13.6768	14.5755	28.2524			172		0.0318099	13.6768	14.5755	28.2524	0.0318099	1
or	2	104	2	Mon	LR	UR	20	29.0611	21.6452	50.7063			176		-0.146253	29.0611	21.6452	50.7063	-0.146253	2
or	2	104	3	Mon	LR	UL	5	56.293	136.888	193.181			180		0.417199	56.293	136.888	193.181	0.417199	3
or	2	104	4	Mon	LR	LL	29	23.2878	35.1599	58.4476			184		0.203123	23.2878	35.1599	58.4476	0.203123	4
or	2	104	5	Mon	LR	UR	10	33.9322	17.6823	51.6146			188		-0.314832	33.9322	17.6823	51.6146	-0.314832	5
or	2	104	6	Tue	LR	UR	17	11.88	6.37003	18.25			212		-0.301915	11.88	6.37003	18.25	-0.301915	1
or	2	104	7	Tue	LR	UL	37	74.1846	100.884	175.068			216		0.152507	74.1846	100.884	175.068	0.152507	2
or	2	104	8	Tue	LR	LL	35	98.2255	89.1692	187.395			220		-0.0483278	98.2255	89.1692	187.395	-0.0483278	3
or	2	104	9	Tue	LR	LL	6	74.186	98.7742	172.96			224		0.142161	74.186	98.7742	172.96	0.142161	4
or	2	104	10	Tue	LR	UR	16	39.9593	55.8763	95.8356			228		0.166086	39.9593	55.8763	95.8356	0.166086	5
or	2	104	11	Wed	LR	LL	11	38.3549	21.2977	59.6525			252		-0.285942	38.3549	21.2977	59.6525	-0.285942	1
or	2	104	12	Wed	LR	UR	22	10.5626	13.4008	23.9634			256		0.118441	10.5626	13.4008	23.9634	0.118441	2
or	2	104	13	Wed	LR	UL	24	13.0257	26.272	39.2977			260		0.337074	13.0257	26.272	39.2977	0.337074	3
or	2	104	14	Wed	LR	UR	9	56.4028	33.3609	89.7637			264		-0.256696	56.4028	33.3609	89.7637	-0.256696	4
or	2	104	15	Wed	LR	LL	1	2.21542	79.2257	81.4411			268		0.945595	2.21542	79.2257	81.4411	0.945595	5
or	2	104	16	Thu	LR	UR	15	23.493	15.5585	39.0515			292		-0.203178	23.493	15.5585	39.0515	-0.203178	1
or	2	104	17	Thu	LR	LL	4	81.8858	53.9466	135.832			296		-0.205689	81.8858	53.9466	135.832	-0.205689	2
or	2	104	18	Thu	LR	UR	12	99.283	55.1665	154.45			300		-0.285637	99.283	55.1665	154.45	-0.285637	3
or	2	104	19	Thu	LR	LL	30	10.8586	48.2669	59.1255			304		0.632692	10.8586	48.2669	59.1255	0.632692	4
or	2	104	20	Thu	LR	UL	1	40.9126	33.5279	74.4405			308		-0.099203	40.9126	33.5279	74.4405	-0.099203	5
or	2	104	21	Fri	LR	UL	1	34.6685	40.8177	75.4861			332		0.0814613	23.2693	39.8255	63.0948	0.262403	1
con	3	104	1	Mon	UR	LL	36	41.8563	48.7315	90.5879			340		0.0758957	41.8563	48.7315	90.5879	0.0758957	1
con	3	104	2	Mon	UR	UL	16	10.295	51.7321	62.0271			344		0.668048	10.295	51.7321	62.0271	0.668048	2
con	3	104	3	Mon	UR	LR	21	21.2537	23.0928	44.3465			348		0.0414711	21.2537	23.0928	44.3465	0.0414711	3
con	3	104	4	Mon	UL	UR	1	135.325	18.1919	153.517			352		-0.762998	135.325	18.1919	153.517	-0.762998	4
con	3	104	5	Mon	LR	LL	6	37.9892	25.2015	63.1907			356		-0.202367	37.9892	25.2015	63.1907	-0.202367	5
con	3	104	6	Tue	LR	UL	11	12.5077	52.8025	65.3103			380		0.616975	12.5077	52.8025	65.3103	0.616975	1
con	3	104	7	Tue	LL	UL	34	19.8013	4.19745	23.9987			384		-0.650194	19.8013	4.19745	23.9987	-0.650194	2
con	3	104	8	Tue	LR	LL	2	4.05102	65.6049	69.6559			388		0.883685	4.05102	65.6049	69.6559	0.883685	3
con	3	104	9	Tue	UL	UR	32	163.803	48.7568	212.56			392		-0.541242	163.803	48.7568	212.56	-0.541242	4
con	3	104	10	Tue	LL	LR	1	20.9635	8.28138	29.2449			396		-0.433654	20.9635	8.28138	29.2449	-0.433654	5
con	3	104	11	Wed	UR	LR	35	7.7328	11.6017	19.3345			420		0.200103	7.7328	11.6017	19.3345	0.200103	1
con	3	104	12	Wed	LL	UL	23	109.594	18.1349	127.729			424		-0.716042	109.594	18.1349	127.729	-0.716042	2
con	3	104	13	Wed	UR	LL	18	11.8359	34.6939	46.5298			428		0.491256	11.8359	34.6939	46.5298	0.491256	3
con	3	104	14	Wed	UL	UR	3	35.4307	1.08004	36.5107			432		-0.940837	35.4307	1.08004	36.5107	-0.940837	4
con	3	104	15	Wed	LR	LL	33	59.7888	212.488	272.277			436		0.560824	59.7888	212.488	272.277	0.560824	5
con	3	104	16	Thu	UR	UL	8	15.5946	13.9433	29.5378			460		-0.0559043	15.5946	13.9433	29.5378	-0.0559043	1
con	3	104	17	Thu	LR	LL	15	22.0838	61.7242	83.808			464		0.472991	22.0838	61.7242	83.808	0.472991	2
con	3	104	18	Thu	UL	LR	29	31.0757	24.3811	55.4568			468		-0.120717	31.0757	24.3811	55.4568	-0.120717	3
con	3	104	19	Thu	UR	LL	19	10.1824	134.837	145.019			472		0.859572	10.1824	134.837	145.019	0.859572	4
con	3	104	20	Thu	UL	LR	17	33.876	4.59367	38.4697			476		-0.76118	33.876	4.59367	38.4697	-0.76118	5
con	3	104	21	Fri	LL	UR	30	59.9282	15.883	75.8111			500		-0.580986	48.728	11.2001	59.9281	-0.626215	1
or	1	105	1	Mon	LL	UL	32	51.3738	34.1858	85.5595			21		-0.20089	51.3738	34.1858	85.5595	-0.20089	1
or	1	105	2	Mon	LL	UR	34	41.4819	35.2765	76.7584			25		-0.0808436	41.4819	35.2765	76.7584	-0.0808436	2
or	1	105	3	Mon	LL	LR	7	17.589	12.3004	29.8894			29		-0.176941	17.589	12.3004	29.8894	-0.176941	3
or	1	105	4	Mon	LL	UL	36	48.5516	102.985	151.536			33		0.359208	48.5516	102.985	151.536	0.359208	4
or	1	105	5	Mon	LL	UR	31	65.0464	77.5278	142.574			37		0.0875427	65.0464	77.5278	142.574	0.0875427	5
or	1	105	6	Tue	LL	UR	2	19.3525	20.563	39.9155			61		0.0303255	19.3525	20.563	39.9155	0.0303255	1
or	1	105	7	Tue	LL	LR	33	29.9046	45.4237	75.3283			65		0.20602	29.9046	45.4237	75.3283	0.20602	2
or	1	105	8	Tue	LL	UL	24	38.7596	34.5876	73.3472			69		-0.05688	38.7596	34.5876	73.3472	-0.05688	3
or	1	105	9	Tue	LL	UR	8	20.8674	29.2768	50.1441			73		0.167705	20.8674	29.2768	50.1441	0.167705	4
or	1	105	10	Tue	LL	UL	18	29.5964	23.9884	53.5847			77		-0.104658	29.5964	23.9884	53.5847	-0.104658	5
or	1	105	11	Wed	LL	LR	12	7.79959	51.6867	59.4863			101		0.737769	7.79959	51.6867	59.4863	0.737769	1
or	1	105	12	Wed	LL	UL	3	16.3992	23.8817	40.2809			105		0.185758	16.3992	23.8817	40.2809	0.185758	2
or	1	105	13	Wed	LL	UR	4	56.82	34.3853	91.2053			109		-0.245979	56.82	34.3853	91.2053	-0.245979	3
or	1	105	14	Wed	LL	UL	13	16.2844	23.784	40.0684			113		0.18717	16.2844	23.784	40.0684	0.18717	4
or	1	105	15	Wed	LL	UR	9	89.6664	28.5545	118.221			117		-0.516929	89.6664	28.5545	118.221	-0.516929	5
or	1	105	16	Thu	LL	UL	1	10.3817	12.3562	22.7379			141		0.086837	10.3817	12.3562	22.7379	0.086837	1
or	1	105	17	Thu	LL	UR	19	30.4516	20.6062	51.0578			145		-0.192829	30.4516	20.6062	51.0578	-0.192829	2
or	1	105	18	Thu	LL	UR	26	13.4921	36.0464	49.5385			149		0.455289	13.4921	36.0464	49.5385	0.455289	3
or	1	105	19	Thu	LL	UL	1	49.16	30.5566	79.7166			153		-0.233369	49.16	30.5566	79.7166	-0.233369	4
or	1	105	20	Thu	LL	LR	41	7.17633	19.593	26.7693			157		0.463839	7.17633	19.593	26.7693	0.463839	5
or	1	105	21	Fri	LL	LR	14	34.6485	42.2366	76.8851			165		0.0986946	13.4098	14.9827	28.3925	0.0553979	1
con	2	105	1	Mon	LL	UL	25	18.5885	14.9392	33.5277			189		-0.108845	18.5885	14.9392	33.5277	-0.108845	1
con	2	105	2	Mon	UR	LL	20	30.6733	17.061	47.7343			193		-0.285168	30.6733	17.061	47.7343	-0.285168	2
con	2	105	3	Mon	UR	UL	5	28.4119	77.3773	105.789			197		0.462858	28.4119	77.3773	105.789	0.462858	3
con	2	105	4	Mon	UL	LR	29	36.0434	16.9627	53.0061			201		-0.359973	36.0434	16.9627	53.0061	-0.359973	4
con	2	105	5	Mon	LL	UR	10	39.495	24.1551	63.6501			205		-0.241004	39.495	24.1551	63.6501	-0.241004	5
con	2	105	6	Tue	LR	LL	17	6.48856	8.72596	15.2145			229		0.147057	6.48856	8.72596	15.2145	0.147057	1
con	2	105	7	Tue	LR	UL	37	63.7208	80.7807	144.502			233		0.11806	63.7208	80.7807	144.502	0.11806	2
con	2	105	8	Tue	UR	LR	35	29.5705	43.5984	73.1689			237		0.191721	29.5705	43.5984	73.1689	0.191721	3
con	2	105	9	Tue	LL	UR	6	68.0841	26.6614	94.7456			241		-0.437199	68.0841	26.6614	94.7456	-0.437199	4
con	2	105	10	Tue	LR	UL	16	57.9453	53.4714	111.417			245		-0.0401549	57.9453	53.4714	111.417	-0.0401549	5
con	2	105	11	Wed	UR	UL	11	10.8347	21.8952	32.7298			269		0.337933	10.8347	21.8952	32.7298	0.337933	1
con	2	105	12	Wed	LR	UL	22	13.3719	12.4961	25.868			273		-0.033857	13.3719	12.4961	25.868	-0.033857	2
con	2	105	13	Wed	LR	LL	24	25.1677	29.7577	54.9254			277		0.0835664	25.1677	29.7577	54.9254	0.0835664	3
con	2	105	14	Wed	LL	UR	9	37.3024	28.7156	66.018			281		-0.130068	37.3024	28.7156	66.018	-0.130068	4
con	2	105	15	Wed	LR	UL	1	27.3496	84.5219	111.871			285		0.511053	27.3496	84.5219	111.871	0.511053	5
con	2	105	16	Thu	LL	UL	15	20.6834	12.7728	33.4562			309		-0.236448	20.6834	12.7728	33.4562	-0.236448	1
con	2	105	17	Thu	UR	LR	4	59.4792	64.298	123.777			313		0.0389312	59.4792	64.298	123.777	0.0389312	2
con	2	105	18	Thu	LR	LL	12	107.257	16.0478	123.304			317		-0.739704	107.257	16.0478	123.304	-0.739704	3
con	2	105	19	Thu	UL	UR	30	25.2703	24.9549	50.2252			321		-0.00627956	25.2703	24.9549	50.2252	-0.00627956	4
con	2	105	20	Thu	LL	UL	1	33.3718	17.4315	50.8034			325		-0.313765	33.3718	17.4315	50.8034	-0.313765	5
con	2	105	21	Fri	UR	LL	1	30.0736	46.7693	76.8429			333		0.217272	14.247	9.76314	24.0102	-0.186749	1
od	3	105	1	Mon	LR	LL	36	64.6695	41.0931	105.763			357		-0.222918	64.6695	41.0931	105.763	-0.222918	1
od	3	105	2	Mon	LR	LL	16	53.4129	50.1713	103.584			361		-0.0312941	53.4129	50.1713	103.584	-0.0312941	2
od	3	105	3	Mon	LR	LL	21	46.3168	38.6895	85.0063			365		-0.0897268	46.3168	38.6895	85.0063	-0.0897268	3
od	3	105	4	Mon	LR	LL	1	38.2861	71.0024	109.288			369		0.299357	38.2861	71.0024	109.288	0.299357	4
od	3	105	5	Mon	LR	LL	6	138.882	34.8233	173.705			373		-0.599053	138.882	34.8233	173.705	-0.599053	5
od	3	105	6	Tue	LR	LL	11	17.2689	6.81656	24.0854			397		-0.433969	17.2689	6.81656	24.0854	-0.433969	1
od	3	105	7	Tue	LR	LL	34	26.1245	33.4593	59.5837			401		0.123101	26.1245	33.4593	59.5837	0.123101	2
od	3	105	8	Tue	LR	LL	2	43.2999	23.9752	67.2751			405		-0.287249	43.2999	23.9752	67.2751	-0.287249	3
od	3	105	9	Tue	LR	LL	32	88.541	104.421	192.962			409		0.0822964	88.541	104.421	192.962	0.0822964	4
od	3	105	10	Tue	LR	LL	1	64.7777	51.2063	115.984			413		-0.117011	64.7777	51.2063	115.984	-0.117011	5
od	3	105	11	Wed	LR	LL	35	22.3079	37.4214	59.7293			437		0.253034	22.3079	37.4214	59.7293	0.253034	1
od	3	105	12	Wed	LR	LL	23	45.775	75.8585	121.634			441		0.247329	45.775	75.8585	121.634	0.247329	2
od	3	105	13	Wed	LR	LL	18	27.4973	101.504	129.001			445		0.57369	27.4973	101.504	129.001	0.57369	3
od	3	105	14	Wed	LR	LL	3	30.3753	21.3739	51.7492			449		-0.173943	30.3753	21.3739	51.7492	-0.173943	4
od	3	105	15	Wed	LR	LL	33	126.398	113.374	239.772			453		-0.0543165	126.398	113.374	239.772	-0.0543165	5
od	3	105	16	Thu	LR	LL	8	25.0642	55.3838	80.448			477		0.376885	25.0642	55.3838	80.448	0.376885	1
od	3	105	17	Thu	LR	LL	15	23.8782	38.4891	62.3673			481		0.234271	23.8782	38.4891	62.3673	0.234271	2
od	3	105	18	Thu	LR	LL	29	79.2674	19.6099	98.8773			485		-0.603349	79.2674	19.6099	98.8773	-0.603349	3
od	3	105	19	Thu	LR	LL	19	34.8037	97.3394	132.143			489		0.473243	34.8037	97.3394	132.143	0.473243	4
od	3	105	20	Thu	LR	LL	17	17.6018	28.1694	45.7711			493		0.230879	17.6018	28.1694	45.7711	0.230879	5
od	3	105	21	Fri	LR	UL	30	95.9875	77.4273	173.415			501		-0.107028	46.4087	54.6339	101.043	0.0814036	1
od	1	106	1	Mon	UR	LL	32	40.4855	59.0793	99.5648			22		0.18675	40.4855	59.0793	99.5648	0.18675	1
od	1	106	2	Mon	UR	LL	34	40.1161	65.6384	105.754			26		0.241336	40.1161	65.6384	105.754	0.241336	2
od	1	106	3	Mon	UR	LL	7	26.5725	24.8474	51.42			30		-0.0335491	26.5725	24.8474	51.42	-0.0335491	3
od	1	106	4	Mon	UR	LL	36	85.8581	83.7873	169.645			34		-0.0122066	85.8581	83.7873	169.645	-0.0122066	4
od	1	106	5	Mon	UR	LL	31	88.0184	77.6662	165.685			38		-0.0624818	88.0184	77.6662	165.685	-0.0624818	5
od	1	106	6	Tue	UR	LL	2	35.1683	45.9132	81.0815			62		0.13252	35.1683	45.9132	81.0815	0.13252	1
od	1	106	7	Tue	UR	LL	33	37.7484	41.9379	79.6864			66		0.0525747	37.7484	41.9379	79.6864	0.0525747	2
od	1	106	8	Tue	UR	LL	24	80.3945	40.5808	120.975			70		-0.329106	80.3945	40.5808	120.975	-0.329106	3
od	1	106	9	Tue	UR	LL	8	69.688	49.9516	119.64			74		-0.164966	69.688	49.9516	119.64	-0.164966	4
od	1	106	10	Tue	UR	LL	18	45.616	44.7425	90.3584			78		-0.00966701	45.616	44.7425	90.3584	-0.00966701	5
od	1	106	11	Wed	UR	LL	12	84.1924	36.2634	120.456			102		-0.397897	84.1924	36.2634	120.456	-0.397897	1
od	1	106	12	Wed	UR	LL	3	49.7411	77.3226	127.064			106		0.217068	49.7411	77.3226	127.064	0.217068	2
od	1	106	13	Wed	UR	LL	4	90.476	75.5763	166.052			110		-0.0897287	90.476	75.5763	166.052	-0.0897287	3
od	1	106	14	Wed	UR	LL	13	21.6959	56.5303	78.2262			114		0.445305	21.6959	56.5303	78.2262	0.445305	4
od	1	106	15	Wed	UR	LL	9	83.5851	98.0775	181.663			118		0.0797762	83.5851	98.0775	181.663	0.0797762	5
od	1	106	16	Thu	UR	LL	1	20.6909	44.7443	65.4351			142		0.367591	20.6909	44.7443	65.4351	0.367591	1
od	1	106	17	Thu	UR	LL	19	30.9624	34.5879	65.5503			146		0.0553078	30.9624	34.5879	65.5503	0.0553078	2
od	1	106	18	Thu	UR	LL	26	40.0811	39.2755	79.3566			150		-0.0101511	40.0811	39.2755	79.3566	-0.0101511	3
od	1	106	19	Thu	UR	LL	1	48.6818	58.4987	107.18			154		0.0915925	48.6818	58.4987	107.18	0.0915925	4
od	1	106	20	Thu	UR	LL	41	66.2271	49.9155	116.143			158		-0.140445	66.2271	49.9155	116.143	-0.140445	5
od	1	106	21	Fri	UR	UL	14	53.3081	67.0789	120.387			166		0.114388	29.1549	30.0237	59.1786	0.0146821	1
or	2	106	1	Mon	UL	LL	25	25.8266	26.5081	52.3347			190		0.0130222	25.8266	26.5081	52.3347	0.0130222	1
or	2	106	2	Mon	UL	LR	20	46.1858	33.7923	79.9781			194		-0.154961	46.1858	33.7923	79.9781	-0.154961	2
or	2	106	3	Mon	UL	UR	5	110.405	88.3002	198.705			198		-0.111243	110.405	88.3002	198.705	-0.111243	3
or	2	106	4	Mon	UL	UR	29	52.6334	35.3374	87.9708			202		-0.196611	52.6334	35.3374	87.9708	-0.196611	4
or	2	106	5	Mon	UL	LL	10	71.0283	60.9663	131.995			206		-0.0762301	71.0283	60.9663	131.995	-0.0762301	5
or	2	106	6	Tue	UL	LL	17	46.8231	30.1373	76.9604			230		-0.216811	46.8231	30.1373	76.9604	-0.216811	1
or	2	106	7	Tue	UL	UR	37	55.2369	85.0521	140.289			234		0.212526	55.2369	85.0521	140.289	0.212526	2
or	2	106	8	Tue	UL	LR	35	71.9479	98.7484	170.696			238		0.157007	71.9479	98.7484	170.696	0.157007	3
or	2	106	9	Tue	UL	LL	6	77.7481	80.4321	158.18			242		0.0169681	77.7481	80.4321	158.18	0.0169681	4
or	2	106	10	Tue	UL	UR	16	36.6573	81.1486	117.806			246		0.377667	36.6573	81.1486	117.806	0.377667	5
or	2	106	11	Wed	UL	LR	11	49.4714	44.1385	93.6099			270		-0.0569691	49.4714	44.1385	93.6099	-0.0569691	1
or	2	106	12	Wed	UL	LL	22	28.6561	37.8503	66.5064			274		0.138246	28.6561	37.8503	66.5064	0.138246	2
or	2	106	13	Wed	UL	UR	24	33.7125	46.4459	80.1585			278		0.158853	33.7125	46.4459	80.1585	0.158853	3
or	2	106	14	Wed	UL	UR	9	88.2695	96.8502	185.12			282		0.0463524	88.2695	96.8502	185.12	0.0463524	4
or	2	106	15	Wed	UL	LL	1	28.5918	75.3551	103.947			286		0.449877	28.5918	75.3551	103.947	0.449877	5
or	2	106	16	Thu	UL	UR	15	44.6508	31.0481	75.6989			310		-0.179696	44.6508	31.0481	75.6989	-0.179696	1
or	2	106	17	Thu	UL	LL	4	51.8609	102.098	153.959			314		0.326304	51.8609	102.098	153.959	0.326304	2
or	2	106	18	Thu	UL	UR	12	29.1487	165.339	194.487			318		0.700251	29.1487	165.339	194.487	0.700251	3
or	2	106	19	Thu	UL	LL	30	38.5375	32.4553	70.9929			322		-0.0856737	38.5375	32.4553	70.9929	-0.0856737	4
or	2	106	20	Thu	UL	LR	1	31.9383	43.2042	75.1425			326		0.149927	31.9383	43.2042	75.1425	0.149927	5
or	2	106	21	Fri	UL	LR	1	68.5893	78.0077	146.597			334		0.0642471	31.444	41.5371	72.9811	0.138298	1
con	3	106	1	Mon	LR	UL	36	77.1984	62.5115	139.71			358		-0.105124	77.1984	62.5115	139.71	-0.105124	1
con	3	106	2	Mon	LL	UL	16	82.0812	74.1598	156.241			362		-0.0507004	82.0812	74.1598	156.241	-0.0507004	2
con	3	106	3	Mon	LR	LL	21	53.5532	82.4897	136.043			366		0.212701	53.5532	82.4897	136.043	0.212701	3
con	3	106	4	Mon	LR	UR	1	68.0038	50.3732	118.377			370		-0.148936	68.0038	50.3732	118.377	-0.148936	4
con	3	106	5	Mon	LL	UL	6	72.4718	159.054	231.526			374		0.373964	72.4718	159.054	231.526	0.373964	5
con	3	106	6	Tue	UR	LL	11	29.5994	63.4765	93.0759			398		0.363972	29.5994	63.4765	93.0759	0.363972	1
con	3	106	7	Tue	UR	UL	34	45.481	31.3219	76.803			402		-0.184356	45.481	31.3219	76.803	-0.184356	2
con	3	106	8	Tue	UR	LR	2	18.4327	55.0813	73.514			406		0.498525	18.4327	55.0813	73.514	0.498525	3
con	3	106	9	Tue	LL	UL	32	106.694	62.6662	169.36			410		-0.259966	106.694	62.6662	169.36	-0.259966	4
con	3	106	10	Tue	LR	LL	1	101.53	81.3339	182.864			414		-0.110446	101.53	81.3339	182.864	-0.110446	5
con	3	106	11	Wed	LR	LL	35	49.7861	79.5682	129.354			438		0.230237	49.7861	79.5682	129.354	0.230237	1
con	3	106	12	Wed	LL	UL	23	53.9234	73.6636	127.587			442		0.154719	53.9234	73.6636	127.587	0.154719	2
con	3	106	13	Wed	UR	LR	18	135.847	88.03	223.878			446		-0.213588	135.847	88.03	223.878	-0.213588	3
con	3	106	14	Wed	LR	UR	3	24.5025	30.1014	54.6038			450		0.102537	24.5025	30.1014	54.6038	0.102537	4
con	3	106	15	Wed	LL	UL	33	102.485	80.8263	183.312			454		-0.118155	102.485	80.8263	183.312	-0.118155	5
con	3	106	16	Thu	UR	LL	8	60.9624	59.4715	120.434			478		-0.0123796	60.9624	59.4715	120.434	-0.0123796	1
con	3	106	17	Thu	UR	UL	15	30.5909	56.9854	87.5763			482		0.30139	30.5909	56.9854	87.5763	0.30139	2
con	3	106	18	Thu	LR	LL	29	101.656	51.606	153.262			486		-0.326567	101.656	51.606	153.262	-0.326567	3
con	3	106	19	Thu	UR	UL	19	48.6459	84.0914	132.737			490		0.267035	48.6459	84.0914	132.737	0.267035	4
con	3	106	20	Thu	LR	UL	17	44.7853	69.2054	113.991			494		0.214229	44.7853	69.2054	113.991	0.214229	5
con	3	106	21	Fri	UR	LL	30	57.6982	121.166	178.864			502		0.354837	27.6919	62.368	90.0599	0.385033	1
od	1	107	1	Mon	UL	LR	32	50.4868	48.7856	99.2724			23		-0.0171372	50.4868	48.7856	99.2724	-0.0171372	1
od	1	107	2	Mon	UL	LR	34	74.4692	46.773	121.242			27		-0.228436	74.4692	46.773	121.242	-0.228436	2
od	1	107	3	Mon	UL	LR	7	46.1816	34.4953	80.677			31		-0.144852	46.1816	34.4953	80.677	-0.144852	3
od	1	107	4	Mon	UL	LR	36	111.675	81.5054	193.181			35		-0.156175	111.675	81.5054	193.181	-0.156175	4
od	1	107	5	Mon	UL	LR	31	83.8094	90.7797	174.589			39		0.0399245	83.8094	90.7797	174.589	0.0399245	5
od	1	107	6	Tue	UL	LR	2	47.6254	17.1415	64.767			63		-0.47067	47.6254	17.1415	64.767	-0.47067	1
od	1	107	7	Tue	UL	LR	33	52.461	63.9302	116.391			67		0.0985398	52.461	63.9302	116.391	0.0985398	2
od	1	107	8	Tue	UL	LR	24	0	0	0			71			0	0	0	0	3
od	1	107	9	Tue	UL	LR	8	43.7517	54.678	98.4297			75		0.111007	43.7517	54.678	98.4297	0.111007	4
od	1	107	10	Tue	UL	LR	18	32.5537	30.8816	63.4353			79		-0.0263602	32.5537	30.8816	63.4353	-0.0263602	5
od	1	107	11	Wed	UL	LR	12	38.2445	55.3262	93.5707			103		0.182554	38.2445	55.3262	93.5707	0.182554	1
od	1	107	12	Wed	UL	LR	3	31.653	61.2848	92.9378			107		0.318835	31.653	61.2848	92.9378	0.318835	2
od	1	107	13	Wed	UL	LR	4	50.789	110.552	161.341			111		0.370414	50.789	110.552	161.341	0.370414	3
od	1	107	14	Wed	UL	LR	13	39.2594	40.4534	79.7128			115		0.0149782	39.2594	40.4534	79.7128	0.0149782	4
od	1	107	15	Wed	UL	LR	9	70.9789	99.1166	170.096			119		0.165423	70.9789	99.1166	170.096	0.165423	5
od	1	107	16	Thu	UL	LR	1	29.9035	30.0665	59.9701			143		0.00271831	29.9035	30.0665	59.9701	0.00271831	1
od	1	107	17	Thu	UL	LR	19	24.8944	30.4593	55.3536			147		0.100533	24.8944	30.4593	55.3536	0.100533	2
od	1	107	18	Thu	UL	LR	26	46.6065	40.7894	87.3959			151		-0.0665597	46.6065	40.7894	87.3959	-0.0665597	3
od	1	107	19	Thu	UL	LR	1	54.112	50.9572	105.069			155		-0.0300266	54.112	50.9572	105.069	-0.0300266	4
od	1	107	20	Thu	UL	LR	41	56.7875	43.8614	100.649			159		-0.128428	56.7875	43.8614	100.649	-0.128428	5
od	1	107	21	Fri	UL	UR	14	62.1748	71.9605	134.135			167		0.0729537	31.5459	36.9606	68.5064	0.0790393	1
con	2	107	1	Mon	LL	UL	25	26.5128	26.4378	52.9506			191		-0.00141747	26.5128	26.4378	52.9506	-0.00141747	1
con	2	107	2	Mon	UR	LL	20	41.1156	30.1511	71.2667			195		-0.153851	41.1156	30.1511	71.2667	-0.153851	2
con	2	107	3	Mon	UR	UL	5	100.775	117.48	218.256			199		0.0765387	100.775	117.48	218.256	0.0765387	3
con	2	107	4	Mon	UL	UR	29	61.4867	56.6152	118.102			203		-0.0412475	61.4867	56.6152	118.102	-0.0412475	4
con	2	107	5	Mon	LL	LR	10	45.0194	61.576	106.595			207		0.155322	45.0194	61.576	106.595	0.155322	5
con	2	107	6	Tue	LR	LL	17	38.1223	54.5811	92.7034			231		0.177543	38.1223	54.5811	92.7034	0.177543	1
con	2	107	7	Tue	LR	UL	37	54.1079	112.562	166.669			235		0.350716	54.1079	112.562	166.669	0.350716	2
con	2	107	8	Tue	UR	LR	35	84.5819	63.375	147.957			239		-0.143332	84.5819	63.375	147.957	-0.143332	3
con	2	107	9	Tue	UL	LL	6	72.7421	72.1984	144.941			243		-0.00375134	72.7421	72.1984	144.941	-0.00375134	4
con	2	107	10	Tue	UR	LR	16	78.165	105.424	183.589			247		0.148476	78.165	105.424	183.589	0.148476	5
con	2	107	11	Wed	UR	LR	11	43.4771	20.0891	63.5662			271		-0.367932	43.4771	20.0891	63.5662	-0.367932	1
con	2	107	12	Wed	LL	UL	22	38.9368	36.7782	75.715			275		-0.0285106	38.9368	36.7782	75.715	-0.0285106	2
con	2	107	13	Wed	LR	UL	24	46.4352	22.4686	68.9038			279		-0.347827	46.4352	22.4686	68.9038	-0.347827	3
con	2	107	14	Wed	LR	UR	9	72.7391	81.7694	154.508			283		0.0584456	72.7391	81.7694	154.508	0.0584456	4
con	2	107	15	Wed	UL	LR	1	71.3349	63.8052	135.14			287		-0.0557183	71.3349	63.8052	135.14	-0.0557183	5
con	2	107	16	Thu	UR	UL	15	30.512	35.9709	66.4829			311		0.0821103	30.512	35.9709	66.4829	0.0821103	1
con	2	107	17	Thu	LR	LL	4	110.919	96.8286	207.748			315		-0.0678259	110.919	96.8286	207.748	-0.0678259	2
con	2	107	18	Thu	UL	LL	12	52.1625	119.809	171.972			319		0.393359	52.1625	119.809	171.972	0.393359	3
con	2	107	19	Thu	LR	UR	30	54.5755	63.4947	118.07			323		0.0755408	54.5755	63.4947	118.07	0.0755408	4
con	2	107	20	Thu	UR	LL	1	62.1188	57.9371	120.056			327		-0.0348312	62.1188	57.9371	120.056	-0.0348312	5
con	2	107	21	Fri	LR	UL	1	115.249	91.983	207.232			335		-0.112272	50.4878	47.0678	97.5556	-0.0350576	1
or	3	107	1	Mon	LR	UR	36	57.4565	76.0509	133.507			359		0.139276	57.4565	76.0509	133.507	0.139276	1
or	3	107	2	Mon	LR	UL	16	85.3937	70.803	156.197			363		-0.0934125	85.3937	70.803	156.197	-0.0934125	2
or	3	107	3	Mon	LR	LL	21	44.7291	71.374	116.103			367		0.229493	44.7291	71.374	116.103	0.229493	3
or	3	107	4	Mon	LR	UR	1	36.9653	82.1119	119.077			371		0.379137	36.9653	82.1119	119.077	0.379137	4
or	3	107	5	Mon	LR	UL	6	60.5806	141.183	201.764			375		0.399489	60.5806	141.183	201.764	0.399489	5
or	3	107	6	Tue	LR	LL	11	40.887	31.6468	72.5338			399		-0.127392	40.887	31.6468	72.5338	-0.127392	1
or	3	107	7	Tue	LR	UL	34	30.3391	30.5853	60.9244			403		0.00404168	30.3391	30.5853	60.9244	0.00404168	2
or	3	107	8	Tue	LR	UR	2	26.0996	49.174	75.2737			407		0.30654	26.0996	49.174	75.2737	0.30654	3
or	3	107	9	Tue	LR	UL	32	126.554	73.1349	199.689			411		-0.267512	126.554	73.1349	199.689	-0.267512	4
or	3	107	10	Tue	LR	UR	1	113.443	122.951	236.394			415		0.0402184	113.443	122.951	236.394	0.0402184	5
or	3	107	11	Wed	LR	UL	35	93.2136	56.642	149.856			439		-0.244046	93.2136	56.642	149.856	-0.244046	1
or	3	107	12	Wed	LR	LL	23	60.884	53.2719	114.156			443		-0.0666818	60.884	53.2719	114.156	-0.0666818	2
or	3	107	13	Wed	LR	UR	18	63.7763	100.247	164.023			447		0.222349	63.7763	100.247	164.023	0.222349	3
or	3	107	14	Wed	LR	UR	3	30.3777	29.4576	59.8354			451		-0.0153771	30.3777	29.4576	59.8354	-0.0153771	4
or	3	107	15	Wed	LR	UL	33	91.3609	106.854	198.215			455		0.0781631	91.3609	106.854	198.215	0.0781631	5
or	3	107	16	Thu	LR	UL	8	50.3405	59.157	109.498			479		0.0805179	50.3405	59.157	109.498	0.0805179	1
or	3	107	17	Thu	LR	UR	15	44.2596	40.5346	84.7941			483		-0.04393	44.2596	40.5346	84.7941	-0.04393	2
or	3	107	18	Thu	LR	UL	29	65.649	60.8486	126.498			487		-0.0379481	65.649	60.8486	126.498	-0.0379481	3
or	3	107	19	Thu	LR	UR	19	62.8138	66.6133	129.427			491		0.0293563	62.8138	66.6133	129.427	0.0293563	4
or	3	107	20	Thu	LR	LL	17	52.2906	55.8042	108.095			495		0.0325047	52.2906	55.8042	108.095	0.0325047	5
or	3	107	21	Fri	LR	LL	30	137.643	90.4895	228.132			503		-0.206692	62.7291	58.2905	121.02	-0.0366772	1
con	1	108	1	Mon	UL	LL	32	64.0515	38.9684	103.02			24		-0.243479	64.0515	38.9684	103.02	-0.243479	1
con	1	108	2	Mon	UL	LR	34	57.0056	75.9128	132.918			28		0.142246	57.0056	75.9128	132.918	0.142246	2
con	1	108	3	Mon	UL	UR	7	27.5563	25.7843	53.3406			32		-0.0332201	27.5563	25.7843	53.3406	-0.0332201	3
con	1	108	4	Mon	LL	LR	36	80.2057	74.2483	154.454			36		-0.0385704	80.2057	74.2483	154.454	-0.0385704	4
con	1	108	5	Mon	UR	LR	31	42.4334	94.9528	137.386			40		0.382276	42.4334	94.9528	137.386	0.382276	5
con	1	108	6	Tue	LL	LR	2	24.2842	12.5896	36.8738			64		-0.31715	24.2842	12.5896	36.8738	-0.31715	1
con	1	108	7	Tue	LL	UR	33	76.5802	42.2869	118.867			68		-0.288501	76.5802	42.2869	118.867	-0.288501	2
con	1	108	8	Tue	LR	UR	24	81.9363	38.9389	120.875			72		-0.355717	81.9363	38.9389	120.875	-0.355717	3
con	1	108	9	Tue	UR	UL	8	26.7965	66.2585	93.0549			76		0.424072	26.7965	66.2585	93.0549	0.424072	4
con	1	108	10	Tue	LR	LL	18	51.2485	63.8581	115.107			80		0.109547	51.2485	63.8581	115.107	0.109547	5
con	1	108	11	Wed	UL	LL	12	76.3591	24.2707	100.63			104		-0.517624	76.3591	24.2707	100.63	-0.517624	1
con	1	108	12	Wed	LR	UR	3	37.0473	37.7653	74.8126			108		0.00959721	37.0473	37.7653	74.8126	0.00959721	2
con	1	108	13	Wed	LL	UR	4	73.6861	70.0668	143.753			112		-0.0251773	73.6861	70.0668	143.753	-0.0251773	3
con	1	108	14	Wed	LL	LR	13	29.3846	29.6654	59.0499			116		0.00475504	29.3846	29.6654	59.0499	0.00475504	4
con	1	108	15	Wed	UR	UL	9	23.096	75.2864	98.3823			120		0.530485	23.096	75.2864	98.3823	0.530485	5
con	1	108	16	Thu	UL	UR	1	18.2691	13.2964	31.5655			144		-0.157535	18.2691	13.2964	31.5655	-0.157535	1
con	1	108	17	Thu	UL	LR	19	57.8648	40.7731	98.6379			148		-0.173277	57.8648	40.7731	98.6379	-0.173277	2
con	1	108	18	Thu	LR	LL	26	20.9439	36.9514	57.8952			152		0.27649	20.9439	36.9514	57.8952	0.27649	3
con	1	108	19	Thu	UR	UL	1	21.8795	47.3538	69.2333			156		0.367948	21.8795	47.3538	69.2333	0.367948	4
con	1	108	20	Thu	LL	LR	41	27.2834	10.9036	38.187			160		-0.428936	27.2834	10.9036	38.187	-0.428936	5
con	1	108	21	Fri	UL	UR	14	73.8513	47.5209	121.372			168		-0.216939	45.4684	20.3319	65.8003	-0.382011	1
od	2	108	1	Mon	LL	UL	25	22.7772	34.9758	57.753			192		0.211219	22.7772	34.9758	57.753	0.211219	1
od	2	108	2	Mon	LL	UL	20	44.3178	37.9443	82.2621			196		-0.0774785	44.3178	37.9443	82.2621	-0.0774785	2
od	2	108	3	Mon	LL	UL	5	108.007	47.0282	155.036			200		-0.393323	108.007	47.0282	155.036	-0.393323	3
od	2	108	4	Mon	LL	UL	29	35.4264	42.9677	78.3941			204		0.0961983	35.4264	42.9677	78.3941	0.0961983	4
od	2	108	5	Mon	LL	UL	10	44.3171	37.6774	81.9944			208		-0.0809774	44.3171	37.6774	81.9944	-0.0809774	5
od	2	108	6	Tue	LL	UL	17	20.4791	27.6121	48.0912			232		0.148321	20.4791	27.6121	48.0912	0.148321	1
od	2	108	7	Tue	LL	UL	37	59.5126	40.8631	100.376			236		-0.185797	59.5126	40.8631	100.376	-0.185797	2
od	2	108	8	Tue	LL	UL	35	71.055	99.3125	170.368			240		0.165862	71.055	99.3125	170.368	0.165862	3
od	2	108	9	Tue	LL	UL	6	54.3816	36.6184	90.9999			244		-0.1952	54.3816	36.6184	90.9999	-0.1952	4
od	2	108	10	Tue	LL	UL	16	95.1903	56.728	151.918			248		-0.253177	95.1903	56.728	151.918	-0.253177	5
od	2	108	11	Wed	LL	UL	11	22.4868	29.3402	51.827			272		0.132235	22.4868	29.3402	51.827	0.132235	1
od	2	108	12	Wed	LL	UL	22	22.7827	23.4779	46.2606			276		0.015027	22.7827	23.4779	46.2606	0.015027	2
od	2	108	13	Wed	LL	UL	24	34.4965	46.6396	81.1361			280		0.149664	34.4965	46.6396	81.1361	0.149664	3
od	2	108	14	Wed	LL	UL	9	95.2237	40.9062	136.13			284		-0.399012	95.2237	40.9062	136.13	-0.399012	4
od	2	108	15	Wed	LL	UL	1	56.1791	83.1619	139.341			288		0.193646	56.1791	83.1619	139.341	0.193646	5
od	2	108	16	Thu	LL	UL	15	39.7971	39.4417	79.2387			312		-0.00448547	39.7971	39.4417	79.2387	-0.00448547	1
od	2	108	17	Thu	LL	UL	4	80.247	81.2422	161.489			316		0.00616301	80.247	81.2422	161.489	0.00616301	2
od	2	108	18	Thu	LL	UL	12	57.4867	68.3933	125.88			320		0.0866423	57.4867	68.3933	125.88	0.0866423	3
od	2	108	19	Thu	LL	UL	30	78.0831	45.7592	123.842			324		-0.261009	78.0831	45.7592	123.842	-0.261009	4
od	2	108	20	Thu	LL	UL	1	35.6822	41.2604	76.9426			328		0.0724983	35.6822	41.2604	76.9426	0.0724983	5
od	2	108	21	Fri	LL	LR	1	57.3084	60.0633	117.372			336		0.023472	27.0492	17.624	44.6732	-0.210982	1
or	3	108	1	Mon	UR	LR	36	111.006	38.8653	149.871			360		-0.481351	111.006	38.8653	149.871	-0.481351	1
or	3	108	2	Mon	UR	LL	16	50.1721	103.181	153.353			364		0.345666	50.1721	103.181	153.353	0.345666	2
or	3	108	3	Mon	UR	UL	21	30.79	50.1042	80.8942			368		0.238758	30.79	50.1042	80.8942	0.238758	3
or	3	108	4	Mon	UR	UL	1	60.8188	56.5345	117.353			372		-0.0365073	60.8188	56.5345	117.353	-0.0365073	4
or	3	108	5	Mon	UR	LL	6	58.5464	58.3477	116.894			376		-0.00169957	58.5464	58.3477	116.894	-0.00169957	5
or	3	108	6	Tue	UR	LL	11	30.4666	48.1603	78.6269			400		0.225033	30.4666	48.1603	78.6269	0.225033	1
or	3	108	7	Tue	UR	UL	34	23.1318	23.5962	46.728			404		0.00994008	23.1318	23.5962	46.728	0.00994008	2
or	3	108	8	Tue	UR	LL	2	17.6409	76.6118	94.2527			408		0.625668	17.6409	76.6118	94.2527	0.625668	3
or	3	108	9	Tue	UR	LR	32	77.2305	87.1663	164.397			412		0.0604374	77.2305	87.1663	164.397	0.0604374	4
or	3	108	10	Tue	UR	UL	1	31.4471	84.0544	115.501			416		0.455469	31.4471	84.0544	115.501	0.455469	5
or	3	108	11	Wed	UR	UL	35	56.4114	72.1619	128.573			440		0.122502	56.4114	72.1619	128.573	0.122502	1
or	3	108	12	Wed	UR	LR	23	49.3559	70.2194	119.575			444		0.17448	49.3559	70.2194	119.575	0.17448	2
or	3	108	13	Wed	UR	LL	18	0.631729	139.317	139.948			448		0.990972	0.631729	139.317	139.948	0.990972	3
or	3	108	14	Wed	UR	UL	3	14.1019	27.3722	41.4741			452		0.319965	14.1019	27.3722	41.4741	0.319965	4
or	3	108	15	Wed	UR	LL	33	75.6745	126.703	202.378			456		0.252147	75.6745	126.703	202.378	0.252147	5
or	3	108	16	Thu	UR	LL	8	38.5201	53.3356	91.8557			480		0.161291	38.5201	53.3356	91.8557	0.161291	1
or	3	108	17	Thu	UR	UL	15	15.4026	38.6498	54.0524			484		0.430086	15.4026	38.6498	54.0524	0.430086	2
or	3	108	18	Thu	UR	UL	29	8.9717	62.0962	71.0679			488		0.747517	8.9717	62.0962	71.0679	0.747517	3
or	3	108	19	Thu	UR	LL	19	24.7651	63.6719	88.4371			492		0.439938	24.7651	63.6719	88.4371	0.439938	4
or	3	108	20	Thu	UR	LR	17	10.5981	23.5491	34.1472			496		0.379271	10.5981	23.5491	34.1472	0.379271	5
or	3	108	21	Fri	UR	LR	30	83.6732	58.4115	142.085			504		-0.177793	32.0748	27.2024	59.2773	-0.0821964	1
od	1	201	1	Mon	LR	LL	1	20.5206	41.4824	62.003			1		0.338077	20.5206	41.4824	62.003	0.338077	1
od	1	201	2	Mon	LR	LL	1	24.5693	42.2108	66.7801			5		0.264174	24.5693	42.2108	66.7801	0.264174	2
od	1	201	3	Mon	LR	LL	1	39.5	47.2391	86.7391			9		0.0892218	39.5	47.2391	86.7391	0.0892218	3
od	1	201	4	Mon	LR	LL	1	15.3941	59.3988	74.7928			13		0.588355	15.3941	59.3988	74.7928	0.588355	4
od	1	201	5	Mon	LR	LL	1	21.9012	42.1042	64.0054			17		0.315645	21.9012	42.1042	64.0054	0.315645	5
od	1	201	6	Tue	LR	LL	1	9.89998	68.1251	78.0251			41		0.746236	9.89998	68.1251	78.0251	0.746236	1
od	1	201	7	Tue	LR	LL	1	41.4798	76.0439	117.524			45		0.294104	41.4798	76.0439	117.524	0.294104	2
od	1	201	8	Tue	LR	LL	1	27.8045	127.34	155.144			49		0.641567	27.8045	127.34	155.144	0.641567	3
od	1	201	9	Tue	LR	LL	1	19.7959	68.4043	88.2001			53		0.551115	19.7959	68.4043	88.2001	0.551115	4
od	1	201	10	Tue	LR	LL	1	10.4354	62.3778	72.8132			57		0.713366	10.4354	62.3778	72.8132	0.713366	5
od	1	201	11	Wed	LR	LL	1	30.8951	67.1996	98.0946			81		0.370097	30.8951	67.1996	98.0946	0.370097	1
od	1	201	12	Wed	LR	LL	1	22.6795	73.5284	96.208			85		0.528531	22.6795	73.5284	96.208	0.528531	2
od	1	201	13	Wed	LR	LL	1	10.7081	113.656	124.364			89		0.827794	10.7081	113.656	124.364	0.827794	3
od	1	201	14	Wed	LR	LL	1	47.9588	85.3168	133.276			93		0.280307	47.9588	85.3168	133.276	0.280307	4
od	1	201	15	Wed	LR	LL	1	60.3803	104.843	165.224			97		0.269109	60.3803	104.843	165.224	0.269109	5
od	1	201	16	Thu	LR	LL	1	34.4812	36.7196	71.2008			121		0.031437	34.4812	36.7196	71.2008	0.031437	1
od	1	201	17	Thu	LR	LL	1	28.7046	56.7943	85.4988			125		0.328539	28.7046	56.7943	85.4988	0.328539	2
od	1	201	18	Thu	LR	LL	1	90.6283	88.1083	178.737			129		-0.0140993	90.6283	88.1083	178.737	-0.0140993	3
od	1	201	19	Thu	LR	LL	1	42.3989	77.0923	119.491			133		0.290343	42.3989	77.0923	119.491	0.290343	4
od	1	201	20	Thu	LR	LL	1	41.6956	135.887	177.583			137		0.530409	41.6956	135.887	177.583	0.530409	5
od	1	201	21	Fri	LR	UL	1	101.862	91.5088	193.371			161		-0.0535397	39.9137	45.9744	85.8881	0.0705642	1
or	2	201	1	Mon	LL	UL	1	32.0156	13.7561	45.7717			169		-0.398926	32.0156	13.7561	45.7717	-0.398926	1
or	2	201	2	Mon	LL	UR	1	85.0208	74.2494	159.27			173		-0.0676294	85.0208	74.2494	159.27	-0.0676294	2
or	2	201	3	Mon	LL	LR	1	55.4184	71.1869	126.605			177		0.124549	55.4184	71.1869	126.605	0.124549	3
or	2	201	4	Mon	LL	UL	1	96.7956	66.1065	162.902			181		-0.18839	96.7956	66.1065	162.902	-0.18839	4
or	2	201	5	Mon	LL	UR	1	81.2803	47.0759	128.356			185		-0.266481	81.2803	47.0759	128.356	-0.266481	5
or	2	201	6	Tue	LL	UR	1	59.4677	136.072	195.54			209		0.391757	59.4677	136.072	195.54	0.391757	1
or	2	201	7	Tue	LL	LR	1	101.843	70.9157	172.758			213		-0.179019	101.843	70.9157	172.758	-0.179019	2
or	2	201	8	Tue	LL	UL	1	53.8113	92.297	146.108			217		0.263405	53.8113	92.297	146.108	0.263405	3
or	2	201	9	Tue	LL	UR	1	43.6768	33.8395	77.5163			221		-0.126907	43.6768	33.8395	77.5163	-0.126907	4
or	2	201	10	Tue	LL	UL	1	132.324	94.3192	226.643			225		-0.167684	132.324	94.3192	226.643	-0.167684	5
or	2	201	11	Wed	LL	LR	1	47.7599	36.4795	84.2393			249		-0.133909	47.7599	36.4795	84.2393	-0.133909	1
or	2	201	12	Wed	LL	UL	1	46.7978	30.3611	77.1589			253		-0.213024	46.7978	30.3611	77.1589	-0.213024	2
or	2	201	13	Wed	LL	UR	1	121.691	50.2835	171.974			257		-0.41522	121.691	50.2835	171.974	-0.41522	3
or	2	201	14	Wed	LL	UL	1	98.8727	68.8811	167.754			261		-0.178783	98.8727	68.8811	167.754	-0.178783	4
or	2	201	15	Wed	LL	UR	1	67.9097	46.0735	113.983			265		-0.191574	67.9097	46.0735	113.983	-0.191574	5
or	2	201	16	Thu	LL	UL	1	45.6685	44.3322	90.0007			289		-0.0148469	45.6685	44.3322	90.0007	-0.0148469	1
or	2	201	17	Thu	LL	UR	1	56.2843	69.7367	126.021			293		0.106747	56.2843	69.7367	126.021	0.106747	2
or	2	201	18	Thu	LL	UR	1	97.9913	45.5407	143.532			297		-0.365428	97.9913	45.5407	143.532	-0.365428	3
or	2	201	19	Thu	LL	UL	1	70.5315	73.3599	143.891			301		0.0196561	70.5315	73.3599	143.891	0.0196561	4
or	2	201	20	Thu	LL	LR	1	131.008	60.1718	191.179			305		-0.37052	131.008	60.1718	191.179	-0.37052	5
or	2	201	21	Fri	LL	LR	1	111.089	86.1938	197.283			329		-0.126189	49.1888	48.3934	97.5821	-0.00815109	1
con	3	201	1	Mon	UL	LL	1	49.4336	89.4327	138.866			337		0.288041	49.4336	89.4327	138.866	0.288041	1
con	3	201	2	Mon	LL	UR	1	60.2134	48.0579	108.271			341		-0.112269	60.2134	48.0579	108.271	-0.112269	2
con	3	201	3	Mon	UL	UR	1	54.4986	37.8003	92.2989			345		-0.180916	54.4986	37.8003	92.2989	-0.180916	3
con	3	201	4	Mon	LR	UL	1	86.5013	36.5903	123.092			349		-0.405478	86.5013	36.5903	123.092	-0.405478	4
con	3	201	5	Mon	UR	LL	1	36.2971	78.0883	114.385			353		0.365355	36.2971	78.0883	114.385	0.365355	5
con	3	201	6	Tue	LL	LR	1	54.0879	21.8724	75.9603			377		-0.424109	54.0879	21.8724	75.9603	-0.424109	1
con	3	201	7	Tue	UL	LR	1	31.7962	53.8999	85.6961			381		0.257931	31.7962	53.8999	85.6961	0.257931	2
con	3	201	8	Tue	LR	UR	1	46.7007	57.1882	103.889			385		0.100949	46.7007	57.1882	103.889	0.100949	3
con	3	201	9	Tue	UR	LL	1	35.2962	59.2997	94.5959			389		0.253747	35.2962	59.2997	94.5959	0.253747	4
con	3	201	10	Tue	UL	LR	1	88.9949	20.5998	109.595			393		-0.624074	88.9949	20.5998	109.595	-0.624074	5
con	3	201	11	Wed	UL	UR	1	78.7978	47.6954	126.493			417		-0.245881	78.7978	47.6954	126.493	-0.245881	1
con	3	201	12	Wed	UL	LR	1	47.6991	39.6079	87.3069			421		-0.092675	47.6991	39.6079	87.3069	-0.092675	2
con	3	201	13	Wed	LL	LR	1	45.3614	34.0245	79.3859			425		-0.142807	45.3614	34.0245	79.3859	-0.142807	3
con	3	201	14	Wed	UR	LL	1	27.7014	75.1011	102.803			429		0.461075	27.7014	75.1011	102.803	0.461075	4
con	3	201	15	Wed	UL	LR	1	39.4012	33.6943	73.0954			433		-0.0780752	39.4012	33.6943	73.0954	-0.0780752	5
con	3	201	16	Thu	UL	LL	1	44.7101	26.2113	70.9214			457		-0.260836	44.7101	26.2113	70.9214	-0.260836	1
con	3	201	17	Thu	LR	UR	1	66.3279	52.5174	118.845			461		-0.116206	66.3279	52.5174	118.845	-0.116206	2
con	3	201	18	Thu	LL	LR	1	65.8275	90.028	155.856			465		0.155275	65.8275	90.028	155.856	0.155275	3
con	3	201	19	Thu	UR	UL	1	62.719	62.0207	124.74			469		-0.00559793	62.719	62.0207	124.74	-0.00559793	4
con	3	201	20	Thu	UL	LL	1	27.5506	45.1785	72.7292			473		0.242377	27.5506	45.1785	72.7292	0.242377	5
con	3	201	21	Fri	LL	UR	1	97.0138	67.8687	164.883			497		-0.176763	48.5986	23.9444	72.543	-0.339857	1
od	1	202	1	Mon	UR	LL	1	59.9296	57.0472	116.977			2		-0.0246403	59.9296	57.0472	116.977	-0.0246403	1
od	1	202	2	Mon	UR	LL	1	43.4568	43.6753	87.1321			6		0.002507	43.4568	43.6753	87.1321	0.002507	2
od	1	202	3	Mon	UR	LL	1	70.6976	70.495	141.193			10		-0.00143459	70.6976	70.495	141.193	-0.00143459	3
od	1	202	4	Mon	UR	LL	1	75.5025	63.5993	139.102			14		-0.0855719	75.5025	63.5993	139.102	-0.0855719	4
od	1	202	5	Mon	UR	LL	1	33.9316	50.8022	84.7337			18		0.199102	33.9316	50.8022	84.7337	0.199102	5
od	1	202	6	Tue	UR	LL	1	70.455	61.2805	131.735			42		-0.069643	70.455	61.2805	131.735	-0.069643	1
od	1	202	7	Tue	UR	LL	1	35.3638	70.6556	106.019			46		0.332881	35.3638	70.6556	106.019	0.332881	2
od	1	202	8	Tue	UR	LL	1	37.3483	67.3256	104.674			50		0.286387	37.3483	67.3256	104.674	0.286387	3
od	1	202	9	Tue	UR	LL	1	48.8646	40.2184	89.0831			54		-0.0970578	48.8646	40.2184	89.0831	-0.0970578	4
od	1	202	10	Tue	UR	LL	1	27.8984	53.2688	81.1671			58		0.312569	27.8984	53.2688	81.1671	0.312569	5
od	1	202	11	Wed	UR	LL	1	70.1206	49.0485	119.169			82		-0.176826	70.1206	49.0485	119.169	-0.176826	1
od	1	202	12	Wed	UR	LL	1	33.9248	56.1508	90.0756			86		0.246749	33.9248	56.1508	90.0756	0.246749	2
od	1	202	13	Wed	UR	LL	1	12.1002	9.40494	21.5051			90		-0.125331	12.1002	9.40494	21.5051	-0.125331	3
od	1	202	14	Wed	UR	LL	1	68.1005	39.7962	107.897			94		-0.262327	68.1005	39.7962	107.897	-0.262327	4
od	1	202	15	Wed	UR	LL	1	57.9631	60.573	118.536			98		0.0220179	57.9631	60.573	118.536	0.0220179	5
od	1	202	16	Thu	UR	LL	1	47.522	36.8855	84.4075			122		-0.126013	47.522	36.8855	84.4075	-0.126013	1
od	1	202	17	Thu	UR	LL	1	44.5489	39.1441	83.693			126		-0.0645798	44.5489	39.1441	83.693	-0.0645798	2
od	1	202	18	Thu	UR	LL	1	67.8577	50.2218	118.08			130		-0.149356	67.8577	50.2218	118.08	-0.149356	3
od	1	202	19	Thu	UR	LL	1	40.8916	37.2968	78.1884			134		-0.0459751	40.8916	37.2968	78.1884	-0.0459751	4
od	1	202	20	Thu	UR	LL	1	88.9966	93.2976	182.294			138		0.0235939	88.9966	93.2976	182.294	0.0235939	5
od	1	202	21	Fri	UR	UL	1	123.294	94.4579	217.751			162		-0.132424	41.0393	39.3898	80.4291	-0.0205082	1
con	2	202	1	Mon	LR	UL	1	42.6889	36.1847	78.8735			170		-0.0824639	42.6889	36.1847	78.8735	-0.0824639	1
con	2	202	2	Mon	LL	UL	1	151.226	88.8761	240.102			174		-0.259681	151.226	88.8761	240.102	-0.259681	2
con	2	202	3	Mon	LR	LL	1	48.6042	73.0809	121.685			178		0.201148	48.6042	73.0809	121.685	0.201148	3
con	2	202	4	Mon	LR	UR	1	56.0981	50.1611	106.259			182		-0.0558728	56.0981	50.1611	106.259	-0.0558728	4
con	2	202	5	Mon	LL	UL	1	69.585	67.0358	136.621			186		-0.018659	69.585	67.0358	136.621	-0.018659	5
con	2	202	6	Tue	UR	LL	1	62.9983	30.8427	93.841			210		-0.342661	62.9983	30.8427	93.841	-0.342661	1
con	2	202	7	Tue	UR	UL	1	60.084	127.589	187.673			214		0.359696	60.084	127.589	187.673	0.359696	2
con	2	202	8	Tue	UR	LR	1	46.7686	55.5975	102.366			218		0.0862479	46.7686	55.5975	102.366	0.0862479	3
con	2	202	9	Tue	LL	UL	1	44.292	39.02	83.312			222		-0.0632802	44.292	39.02	83.312	-0.0632802	4
con	2	202	10	Tue	LR	LL	1	185.989	58.7963	244.785			226		-0.519608	185.989	58.7963	244.785	-0.519608	5
con	2	202	11	Wed	LR	LL	1	82.57	65.1561	147.726			250		-0.11788	82.57	65.1561	147.726	-0.11788	1
con	2	202	12	Wed	LL	UL	1	31.6327	53.3489	84.9816			254		0.25554	31.6327	53.3489	84.9816	0.25554	2
con	2	202	13	Wed	UR	LR	1	76.1918	94.6875	170.879			258		0.108238	76.1918	94.6875	170.879	0.108238	3
con	2	202	14	Wed	LR	UR	1	98.1466	36.8299	134.976			262		-0.454277	98.1466	36.8299	134.976	-0.454277	4
con	2	202	15	Wed	LL	UL	1	32.875	76.9158	109.791			266		0.401134	32.875	76.9158	109.791	0.401134	5
con	2	202	16	Thu	UR	LL	1	65.2358	47.6408	112.877			290		-0.155879	65.2358	47.6408	112.877	-0.155879	1
con	2	202	17	Thu	UR	UL	1	44.2125	40.5602	84.7727			294		-0.0430829	44.2125	40.5602	84.7727	-0.0430829	2
con	2	202	18	Thu	LR	LL	1	67.9719	51.9681	119.94			298		-0.133432	67.9719	51.9681	119.94	-0.133432	3
con	2	202	19	Thu	UR	UL	1	61.4876	37.6237	99.1113			302		-0.240779	61.4876	37.6237	99.1113	-0.240779	4
con	2	202	20	Thu	LR	UL	1	66.3426	62.8074	129.15			306		-0.0273728	66.3426	62.8074	129.15	-0.0273728	5
con	2	202	21	Fri	UR	LL	1	78.6446	91.5239	170.169			330		0.0756855	38.4961	54.0526	92.5487	0.16809	1
or	3	202	1	Mon	UL	LL	1	85.103	72.3923	157.495			338		-0.0807051	85.103	72.3923	157.495	-0.0807051	1
or	3	202	2	Mon	UL	LR	1	46.0031	57.7141	103.717			342		0.112913	46.0031	57.7141	103.717	0.112913	2
or	3	202	3	Mon	UL	UR	1	51.4027	75.4925	126.895			346		0.18984	51.4027	75.4925	126.895	0.18984	3
or	3	202	4	Mon	UL	UR	1	34.7372	58.5747	93.3119			350		0.25546	34.7372	58.5747	93.3119	0.25546	4
or	3	202	5	Mon	UL	LL	1	39.5069	82.5188	122.026			354		0.352482	39.5069	82.5188	122.026	0.352482	5
or	3	202	6	Tue	UL	LL	1	44.6576	52.3291	96.9867			378		0.079099	44.6576	52.3291	96.9867	0.079099	1
or	3	202	7	Tue	UL	UR	1	31.5874	39.8609	71.4484			382		0.115797	31.5874	39.8609	71.4484	0.115797	2
or	3	202	8	Tue	UL	LR	1	68.4884	132.917	201.405			386		0.319895	68.4884	132.917	201.405	0.319895	3
or	3	202	9	Tue	UL	LL	1	23.9481	28.716	52.6641			390		0.0905335	23.9481	28.716	52.6641	0.0905335	4
or	3	202	10	Tue	UL	UR	1	70.6622	56.428	127.09			394		-0.112	70.6622	56.428	127.09	-0.112	5
or	3	202	11	Wed	UL	LR	1	26.6003	35.7994	62.3997			418		0.147422	26.6003	35.7994	62.3997	0.147422	1
or	3	202	12	Wed	UL	LL	1	25.8015	32.9015	58.703			422		0.120949	25.8015	32.9015	58.703	0.120949	2
or	3	202	13	Wed	UL	UR	1	17.3003	44.0337	61.334			426		0.435865	17.3003	44.0337	61.334	0.435865	3
or	3	202	14	Wed	UL	UR	1	61.8019	68.9647	130.767			430		0.0547759	61.8019	68.9647	130.767	0.0547759	4
or	3	202	15	Wed	UL	LL	1	22.6766	57.2485	79.9251			434		0.432554	22.6766	57.2485	79.9251	0.432554	5
or	3	202	16	Thu	UL	UR	1	28.212	43.3143	71.5263			458		0.211143	28.212	43.3143	71.5263	0.211143	1
or	3	202	17	Thu	UL	LL	1	84.2338	91.8346	176.068			462		0.0431693	84.2338	91.8346	176.068	0.0431693	2
or	3	202	18	Thu	UL	UR	1	84.3286	86.3278	170.656			466		0.0117147	84.3286	86.3278	170.656	0.0117147	3
or	3	202	19	Thu	UL	LL	1	32.4484	29.812	62.2604			470		-0.0423442	32.4484	29.812	62.2604	-0.0423442	4
or	3	202	20	Thu	UL	LR	1	46.4507	34.7537	81.2044			474		-0.144044	46.4507	34.7537	81.2044	-0.144044	5
or	3	202	21	Fri	UL	LR	1	44.0115	32.7567	76.7682			498		-0.146607	13.0557	19.8005	32.8563	0.205281	1
or	1	203	1	Mon	LR	UR	1	21.5919	62.1834	83.7753			3		0.484529	21.5919	62.1834	83.7753	0.484529	1
or	1	203	2	Mon	LR	UL	1	21.2015	73.693	94.8945			7		0.553156	21.2015	73.693	94.8945	0.553156	2
or	1	203	3	Mon	LR	LL	1	40.2972	60.089	100.386			11		0.197157	40.2972	60.089	100.386	0.197157	3
or	1	203	4	Mon	LR	UR	1	114.896	59.2125	174.108			15		-0.319821	114.896	59.2125	174.108	-0.319821	4
or	1	203	5	Mon	LR	UL	1	45.6481	30.0557	75.7038			19		-0.205965	45.6481	30.0557	75.7038	-0.205965	5
or	1	203	6	Tue	LR	LL	1	22.6992	94.2007	116.9			43		0.611648	22.6992	94.2007	116.9	0.611648	1
or	1	203	7	Tue	LR	UL	1	47.6119	71.2747	118.887			47		0.199037	47.6119	71.2747	118.887	0.199037	2
or	1	203	8	Tue	LR	UR	1	41.6752	57.7708	99.4461			51		0.161853	41.6752	57.7708	99.4461	0.161853	3
or	1	203	9	Tue	LR	UL	1	68.9442	30.9603	99.9045			55		-0.380202	68.9442	30.9603	99.9045	-0.380202	4
or	1	203	10	Tue	LR	UR	1	56.8757	95.6608	152.536			59		0.254268	56.8757	95.6608	152.536	0.254268	5
or	1	203	11	Wed	LR	UL	1	62.8905	63.0044	125.895			83		0.000904517	62.8905	63.0044	125.895	0.000904517	1
or	1	203	12	Wed	LR	LL	1	43.1055	60.9459	104.051			87		0.171458	43.1055	60.9459	104.051	0.171458	2
or	1	203	13	Wed	LR	UR	1	68.8936	22.5006	91.3941			91		-0.507614	68.8936	22.5006	91.3941	-0.507614	3
or	1	203	14	Wed	LR	UR	1	50.0909	68.7005	118.791			95		0.156658	50.0909	68.7005	118.791	0.156658	4
or	1	203	15	Wed	LR	UL	1	78.5001	126.393	204.893			99		0.233745	78.5001	126.393	204.893	0.233745	5
or	1	203	16	Thu	LR	UL	1	46.9028	24.4059	71.3087			123		-0.315487	46.9028	24.4059	71.3087	-0.315487	1
or	1	203	17	Thu	LR	UR	1	89.5966	51.8685	141.465			127		-0.266695	89.5966	51.8685	141.465	-0.266695	2
or	1	203	18	Thu	LR	UL	1	65.883	52.2572	118.14			131		-0.115336	65.883	52.2572	118.14	-0.115336	3
or	1	203	19	Thu	LR	UR	1	42.1029	29.3938	71.4966			135		-0.177758	42.1029	29.3938	71.4966	-0.177758	4
or	1	203	20	Thu	LR	LL	1	81.1981	115.685	196.883			139		0.175166	81.1981	115.685	196.883	0.175166	5
or	1	203	21	Fri	LR	LL	1	93.1724	203.381	296.554			163		0.371632	40.6036	95.2956	135.899	0.402446	1
con	2	203	1	Mon	LL	UL	1	72.0934	40.0571	112.151			171		-0.285655	72.0934	40.0571	112.151	-0.285655	1
con	2	203	2	Mon	UR	LL	1	147.475	92.9908	240.466			175		-0.226579	147.475	92.9908	240.466	-0.226579	2
con	2	203	3	Mon	UR	UL	1	92.4827	60.006	152.489			179		-0.212978	92.4827	60.006	152.489	-0.212978	3
con	2	203	4	Mon	UL	UR	1	61.205	117.26	178.465			183		0.314095	61.205	117.26	178.465	0.314095	4
con	2	203	5	Mon	LL	LR	1	95.5677	72.4876	168.055			187		-0.137336	95.5677	72.4876	168.055	-0.137336	5
con	2	203	6	Tue	LR	LL	1	55.5605	97.5521	153.113			211		0.274254	55.5605	97.5521	153.113	0.274254	1
con	2	203	7	Tue	LR	UL	1	47.7649	114.049	161.814			215		0.409631	47.7649	114.049	161.814	0.409631	2
con	2	203	8	Tue	UR	LR	1	52.4623	52.0542	104.516			219		-0.00390459	52.4623	52.0542	104.516	-0.00390459	3
con	2	203	9	Tue	UL	LL	1	68.6409	42.6007	111.242			223		-0.234087	68.6409	42.6007	111.242	-0.234087	4
con	2	203	10	Tue	UR	LR	1	117.957	95.7524	213.709			227		-0.103899	117.957	95.7524	213.709	-0.103899	5
con	2	203	11	Wed	UR	LR	1	66.2441	51.2431	117.487			251		-0.127682	66.2441	51.2431	117.487	-0.127682	1
con	2	203	12	Wed	LL	UL	1	47.016	43.1458	90.1618			255		-0.0429247	47.016	43.1458	90.1618	-0.0429247	2
con	2	203	13	Wed	LR	UL	1	88.4269	70.1111	158.538			259		-0.115529	88.4269	70.1111	158.538	-0.115529	3
con	2	203	14	Wed	LR	UR	1	58.3141	41.0419	99.356			263		-0.173841	58.3141	41.0419	99.356	-0.173841	4
con	2	203	15	Wed	UL	LR	1	45.5913	47.1555	92.7468			267		0.0168658	45.5913	47.1555	92.7468	0.0168658	5
con	2	203	16	Thu	UR	UL	1	48.2881	65.455	113.743			291		0.150927	48.2881	65.455	113.743	0.150927	1
con	2	203	17	Thu	LR	LL	1	48.4724	67.0771	115.549			295		0.16101	48.4724	67.0771	115.549	0.16101	2
con	2	203	18	Thu	UL	LL	1	37.2988	69.6176	106.916			299		0.302281	37.2988	69.6176	106.916	0.302281	3
con	2	203	19	Thu	LR	UR	1	28.7124	42.5716	71.2839			303		0.194423	28.7124	42.5716	71.2839	0.194423	4
con	2	203	20	Thu	UR	LL	1	51.372	49.4969	100.869			307		-0.0185899	51.372	49.4969	100.869	-0.0185899	5
con	2	203	21	Fri	LR	UL	1	85.369	137.495	222.864			331		0.233893	51.1529	69.3037	120.457	0.150684	1
od	3	203	1	Mon	UL	LR	1	98.08	72.1732	170.253			339		-0.152167	98.08	72.1732	170.253	-0.152167	1
od	3	203	2	Mon	UL	LR	1	39.0554	38.4093	77.4647			343		-0.00834062	39.0554	38.4093	77.4647	-0.00834062	2
od	3	203	3	Mon	UL	LR	1	39.102	26.5077	65.6097			347		-0.191957	39.102	26.5077	65.6097	-0.191957	3
od	3	203	4	Mon	UL	LR	1	56.8943	65.1026	121.997			351		0.0672831	56.8943	65.1026	121.997	0.0672831	4
od	3	203	5	Mon	UL	LR	1	27.7962	43.9957	71.7919			355		0.225645	27.7962	43.9957	71.7919	0.225645	5
od	3	203	6	Tue	UL	LR	1	17.1003	17.9006	35.0009			379		0.0228632	17.1003	17.9006	35.0009	0.0228632	1
od	3	203	7	Tue	UL	LR	1	32.4009	38.001	70.4019			383		0.0795443	32.4009	38.001	70.4019	0.0795443	2
od	3	203	8	Tue	UL	LR	1	63.8921	78.3996	142.292			387		0.101956	63.8921	78.3996	142.292	0.101956	3
od	3	203	9	Tue	UL	LR	1	30.5085	33.4837	63.9921			391		0.0464926	30.5085	33.4837	63.9921	0.0464926	4
od	3	203	10	Tue	UL	LR	1	51.3054	26.9013	78.2067			395		-0.312046	51.3054	26.9013	78.2067	-0.312046	5
od	3	203	11	Wed	UL	LR	1	31.5009	34.6047	66.1056			419		0.0469521	31.5009	34.6047	66.1056	0.0469521	1
od	3	203	12	Wed	UL	LR	1	22.3257	22.5964	44.922			423		0.00602648	22.3257	22.5964	44.922	0.00602648	2
od	3	203	13	Wed	UL	LR	1	28.2523	19.4443	47.6966			427		-0.184668	28.2523	19.4443	47.6966	-0.184668	3
od	3	203	14	Wed	UL	LR	1	41.4957	54.3871	95.8828			431		0.134449	41.4957	54.3871	95.8828	0.134449	4
od	3	203	15	Wed	UL	LR	1	35.997	43.6009	79.5979			435		0.0955285	35.997	43.6009	79.5979	0.0955285	5
od	3	203	16	Thu	UL	LR	1	24.6058	46.7207	71.3265			459		0.310051	24.6058	46.7207	71.3265	0.310051	1
od	3	203	17	Thu	UL	LR	1	85.8025	44.9147	130.717			463		-0.312796	85.8025	44.9147	130.717	-0.312796	2
od	3	203	18	Thu	UL	LR	1	66.3222	65.9272	132.249			467		-0.00298681	66.3222	65.9272	132.249	-0.00298681	3
od	3	203	19	Thu	UL	LR	1	64.8192	29.212	94.0313			471		-0.378674	64.8192	29.212	94.0313	-0.378674	4
od	3	203	20	Thu	UL	LR	1	26.6983	44.9116	71.6099			475		0.254341	26.6983	44.9116	71.6099	0.254341	5
od	3	203	21	Fri	UL	UR	1	30.7998	44.4964	75.2962			499		0.181902	21.6999	33.8963	55.5962	0.219374	1
or	1	204	1	Mon	LL	UL	1	43.0966	54.6021	97.6988			4		0.117765	43.0966	54.6021	97.6988	0.117765	1
or	1	204	2	Mon	LL	LR	1	81.3897	42.8927	124.282			8		-0.309754	81.3897	42.8927	124.282	-0.309754	2
or	1	204	3	Mon	LL	UR	1	80.5036	44.8964	125.4			12		-0.283949	80.5036	44.8964	125.4	-0.283949	3
or	1	204	4	Mon	LL	UL	1	73.5172	65.6337	139.151			16		-0.0566545	73.5172	65.6337	139.151	-0.0566545	4
or	1	204	5	Mon	LL	LR	1	47.3403	55.0792	102.419			20		0.0755611	47.3403	55.0792	102.419	0.0755611	5
or	1	204	6	Tue	LL	UR	1	90.5247	40.6754	131.2			44		-0.379949	90.5247	40.6754	131.2	-0.379949	1
or	1	204	7	Tue	LL	LR	1	78.7562	44.8159	123.572			48		-0.27466	78.7562	44.8159	123.572	-0.27466	2
or	1	204	8	Tue	LL	UL	1	71.1046	73.8202	144.925			52		0.0187382	71.1046	73.8202	144.925	0.0187382	3
or	1	204	9	Tue	LL	UL	1	58.5045	54.6263	113.131			56		-0.0342806	58.5045	54.6263	113.131	-0.0342806	4
or	1	204	10	Tue	LL	LR	1	64.0853	47.8769	111.962			60		-0.144767	64.0853	47.8769	111.962	-0.144767	5
or	1	204	11	Wed	LL	LR	1	57.4078	42.2088	99.6166			84		-0.152575	57.4078	42.2088	99.6166	-0.152575	1
or	1	204	12	Wed	LL	UR	1	43.0041	43.1846	86.1887			88		0.00209356	43.0041	43.1846	86.1887	0.00209356	2
or	1	204	13	Wed	LL	UL	1	74.7914	51.2038	125.995			92		-0.18721	74.7914	51.2038	125.995	-0.18721	3
or	1	204	14	Wed	LL	LR	1	72.2729	70.9155	143.188			96		-0.00948	72.2729	70.9155	143.188	-0.00948	4
or	1	204	15	Wed	LL	UL	1	87.0955	91.5971	178.693			100		0.0251918	87.0955	91.5971	178.693	0.0251918	5
or	1	204	16	Thu	LL	UL	1	38.437	21.6157	60.0527			124		-0.280108	38.437	21.6157	60.0527	-0.280108	1
or	1	204	17	Thu	LL	LR	1	45.6937	59.0979	104.792			128		0.127913	45.6937	59.0979	104.792	0.127913	2
or	1	204	18	Thu	LL	LR	1	50.7961	55.7982	106.594			132		0.0469269	50.7961	55.7982	106.594	0.0469269	3
or	1	204	19	Thu	LL	UL	1	21.2009	27.6994	48.9002			136		0.132893	21.2009	27.6994	48.9002	0.132893	4
or	1	204	20	Thu	LL	UR	1	49.8079	90.897	140.705			140		0.292024	49.8079	90.897	140.705	0.292024	5
or	1	204	21	Fri	LL	UR	1	69.6626	151.739	221.402			164		0.370713	41.0326	71.8607	112.893	0.273073	1
con	2	204	1	Mon	UR	LL	1	25.9965	34.7053	60.7018			172		0.143468	25.9965	34.7053	60.7018	0.143468	1
con	2	204	2	Mon	UR	UL	1	101.042	126.933	227.976			176		0.11357	101.042	126.933	227.976	0.11357	2
con	2	204	3	Mon	UR	LR	1	45.8642	40.2561	86.1203			180		-0.0651194	45.8642	40.2561	86.1203	-0.0651194	3
con	2	204	4	Mon	UL	LL	1	85.8924	86.1292	172.022			184		0.00137642	85.8924	86.1292	172.022	0.00137642	4
con	2	204	5	Mon	LR	UR	1	63.9732	47.5162	111.489			188		-0.14761	63.9732	47.5162	111.489	-0.14761	5
con	2	204	6	Tue	LR	UL	1	83.4117	83.0475	166.459			212		-0.00218816	83.4117	83.0475	166.459	-0.00218816	1
con	2	204	7	Tue	LL	UL	1	129.865	78.0124	207.877			216		-0.249438	129.865	78.0124	207.877	-0.249438	2
con	2	204	8	Tue	LR	LL	1	53.8802	61.6315	115.512			220		0.0671041	53.8802	61.6315	115.512	0.0671041	3
con	2	204	9	Tue	UL	LR	1	64.0794	25.1905	89.2699			224		-0.435633	64.0794	25.1905	89.2699	-0.435633	4
con	2	204	10	Tue	LL	UR	1	166.977	50.7077	217.685			228		-0.534119	166.977	50.7077	217.685	-0.534119	5
con	2	204	11	Wed	LR	UL	1	48.9642	75.0014	123.966			252		0.210036	48.9642	75.0014	123.966	0.210036	1
con	2	204	12	Wed	LR	LL	1	37.9566	93.9252	131.882			256		0.424385	37.9566	93.9252	131.882	0.424385	2
con	2	204	13	Wed	LL	UL	1	77.9995	46.8028	124.802			260		-0.249969	77.9995	46.8028	124.802	-0.249969	3
con	2	204	14	Wed	UR	UL	1	62.1614	53.2624	115.424			264		-0.0770987	62.1614	53.2624	115.424	-0.0770987	4
con	2	204	15	Wed	LR	LL	1	34.6805	74.3958	109.076			268		0.364106	34.6805	74.3958	109.076	0.364106	5
con	2	204	16	Thu	UR	LR	1	80.5035	48.7212	129.225			292		-0.245946	80.5035	48.7212	129.225	-0.245946	1
con	2	204	17	Thu	UR	LL	1	31.3522	44.4399	75.792			296		0.172679	31.3522	44.4399	75.792	0.172679	2
con	2	204	18	Thu	UR	UL	1	46.6408	41.2522	87.893			300		-0.0613088	46.6408	41.2522	87.893	-0.0613088	3
con	2	204	19	Thu	LL	LR	1	61.5555	32.0407	93.5962			304		-0.315342	61.5555	32.0407	93.5962	-0.315342	4
con	2	204	20	Thu	UR	UL	1	71.5938	48.5127	120.107			308		-0.192172	71.5938	48.5127	120.107	-0.192172	5
con	2	204	21	Fri	LL	LR	1	133.253	65.7818	199.034			332		-0.338991	58.4595	35.3161	93.7755	-0.246796	1
od	3	204	1	Mon	LR	UL	1	67.2302	88.1046	155.335			340		0.134384	67.2302	88.1046	155.335	0.134384	1
od	3	204	2	Mon	LR	UL	1	47.4291	42.6611	90.0902			344		-0.0529255	47.4291	42.6611	90.0902	-0.0529255	2
od	3	204	3	Mon	LR	UL	1	50.486	61.9248	112.411			348		0.101759	50.486	61.9248	112.411	0.101759	3
od	3	204	4	Mon	LR	UL	1	72.1981	60.0982	132.296			352		-0.0914606	72.1981	60.0982	132.296	-0.0914606	4
od	3	204	5	Mon	LR	UL	1	59.7012	52.8919	112.593			356		-0.0604763	59.7012	52.8919	112.593	-0.0604763	5
od	3	204	6	Tue	LR	UL	1	62.5519	69.7499	132.302			380		0.0544064	62.5519	69.7499	132.302	0.0544064	1
od	3	204	7	Tue	LR	UL	1	22.3959	65.395	87.7909			384		0.48979	22.3959	65.395	87.7909	0.48979	2
od	3	204	8	Tue	LR	UL	1	83.1962	143.992	227.188			388		0.2676	83.1962	143.992	227.188	0.2676	3
od	3	204	9	Tue	LR	UL	1	28.1998	110.085	138.285			392		0.592149	28.1998	110.085	138.285	0.592149	4
od	3	204	10	Tue	LR	UL	1	0	0	0			408			0	0	0	0	5
od	3	204	11	Wed	LR	UL	1	46.8942	52.9055	99.7997			420		0.0602332	46.8942	52.9055	99.7997	0.0602332	1
od	3	204	12	Wed	LR	UL	1	29.0649	38.6881	67.753			424		0.142035	29.0649	38.6881	67.753	0.142035	2
od	3	204	13	Wed	LR	UL	1	50.8968	33.5005	84.3973			428		-0.206125	50.8968	33.5005	84.3973	-0.206125	3
od	3	204	14	Wed	LR	UL	1	73.1774	67.7644	140.942			432		-0.0384064	73.1774	67.7644	140.942	-0.0384064	4
od	3	204	15	Wed	LR	UL	1	61.8014	60.2968	122.098			436		-0.0123225	61.8014	60.2968	122.098	-0.0123225	5
od	3	204	16	Thu	LR	UL	1	28.1836	72.6657	100.849			460		0.441074	28.1836	72.6657	100.849	0.441074	1
od	3	204	17	Thu	LR	UL	1	76.027	85.3283	161.355			464		0.0576445	76.027	85.3283	161.355	0.0576445	2
od	3	204	18	Thu	LR	UL	1	82.1987	86.8799	169.079			468		0.0276866	82.1987	86.8799	169.079	0.0276866	3
od	3	204	19	Thu	LR	UL	1	18.808	56.8193	75.6274			472		0.502613	18.808	56.8193	75.6274	0.502613	4
od	3	204	20	Thu	LR	UL	1	61.1183	70.1163	131.235			476		0.0685638	61.1183	70.1163	131.235	0.0685638	5
od	3	204	21	Fri	LR	LL	1	45.1641	105.223	150.387			500		0.399362	27.8918	45.3297	73.2215	0.238154	1
con	1	205	1	Mon	LR	LL	1	60.565	128.425	188.99			21		0.359068	60.565	128.425	188.99	0.359068	1
con	1	205	2	Mon	LR	UL	1	57.0574	52.7426	109.8			25		-0.0392967	57.0574	52.7426	109.8	-0.0392967	2
con	1	205	3	Mon	UR	LR	1	63.8984	50.2994	114.198			29		-0.119083	63.8984	50.2994	114.198	-0.119083	3
con	1	205	4	Mon	UR	UL	1	57.8359	114.924	172.76			33		0.330448	57.8359	114.924	172.76	0.330448	4
con	1	205	5	Mon	LR	LL	1	99.0089	85.3224	184.331			37		-0.0742498	99.0089	85.3224	184.331	-0.0742498	5
con	1	205	6	Tue	LL	UL	1	54.1811	56.8757	111.057			61		0.0242633	54.1811	56.8757	111.057	0.0242633	1
con	1	205	7	Tue	UR	LL	1	63.8916	87.7458	151.637			65		0.157311	63.8916	87.7458	151.637	0.157311	2
con	1	205	8	Tue	UR	UL	1	35.8157	77.4035	113.219			69		0.367321	35.8157	77.4035	113.219	0.367321	3
con	1	205	9	Tue	LL	LR	1	84.9936	80.0966	165.09			73		-0.0296624	84.9936	80.0966	165.09	-0.0296624	4
con	1	205	10	Tue	UL	UR	1	51.4728	66.3274	117.8			77		0.1261	51.4728	66.3274	117.8	0.1261	5
con	1	205	11	Wed	LR	LL	1	53.7009	98.7971	152.498			101		0.295717	53.7009	98.7971	152.498	0.295717	1
con	1	205	12	Wed	UR	LL	1	65.8724	149.032	214.904			105		0.386961	65.8724	149.032	214.904	0.386961	2
con	1	205	13	Wed	UR	LR	1	43.0963	146.697	189.794			109		0.545862	43.0963	146.697	189.794	0.545862	3
con	1	205	14	Wed	LL	LR	1	171.279	57.6966	228.976			113		-0.496047	171.279	57.6966	228.976	-0.496047	4
con	1	205	15	Wed	UL	UR	1	97.4028	77.596	174.999			117		-0.113182	97.4028	77.596	174.999	-0.113182	5
con	1	205	16	Thu	LL	UL	1	93.2852	110.092	203.377			141		0.0826377	93.2013	110.092	203.293	0.0830846	1
con	1	205	17	Thu	LR	UL	1	84.5897	168.392	252.981			145		0.331257	84.5897	168.008	252.598	0.330242	2
con	1	205	18	Thu	UL	LL	1	72.2961	52.6036	124.9			149		-0.157666	72.1123	52.6036	124.716	-0.156425	3
con	1	205	19	Thu	UR	LR	1	61.4923	96.1966	157.689			153		0.220081	61.4923	96.1966	157.689	0.220081	4
con	1	205	20	Thu	UR	UL	1	52.1863	80.3623	132.549			157		0.212571	52.1863	80.3623	132.549	0.212571	5
con	1	205	21	Fri	LR	LL	1	98.8346	87.6968	186.531			165		-0.0597103	58.2957	43.9013	102.197	-0.140849	1
od	2	205	1	Mon	LL	LR	1	43.5639	25.6062	69.1701			189		-0.259615	43.5639	25.6062	69.1701	-0.259615	1
od	2	205	2	Mon	LL	LR	1	87.5528	85.7595	173.312			193		-0.0103471	87.5528	85.7595	173.312	-0.0103471	2
od	2	205	3	Mon	LL	LR	1	79.4198	44.8306	124.25			197		-0.278383	79.4198	44.8306	124.25	-0.278383	3
od	2	205	4	Mon	LL	LR	1	90.6776	96.4706	187.148			201		0.0309544	90.6776	96.4706	187.148	0.0309544	4
od	2	205	5	Mon	LL	LR	1	115.065	71.9975	187.062			205		-0.23023	115.065	71.9975	187.062	-0.23023	5
od	2	205	6	Tue	LL	LR	1	40.7224	43.1274	83.8499			229		0.0286821	40.7224	43.1274	83.8499	0.0286821	1
od	2	205	7	Tue	LL	LR	1	178.179	70.4402	248.619			233		-0.433349	178.179	70.4402	248.619	-0.433349	2
od	2	205	8	Tue	LL	LR	1	53.5203	43.0722	96.5925			237		-0.108166	53.5203	43.0722	96.5925	-0.108166	3
od	2	205	9	Tue	LL	LR	1	52.768	140.301	193.069			241		0.453376	52.768	140.301	193.069	0.453376	4
od	2	205	10	Tue	LL	LR	1	78.7117	74.6366	153.348			245		-0.0265743	78.7117	74.6366	153.348	-0.0265743	5
od	2	205	11	Wed	LL	LR	1	46.7543	28.9414	75.6956			269		-0.235323	46.7543	28.9414	75.6956	-0.235323	1
od	2	205	12	Wed	LL	LR	1	56.7595	51.5859	108.345			273		-0.0477508	56.7595	51.5859	108.345	-0.0477508	2
od	2	205	13	Wed	LL	LR	1	45.1	36.636	81.736			277		-0.103552	45.1	36.636	81.736	-0.103552	3
od	2	205	14	Wed	LL	LR	1	72.4821	47.4167	119.899			281		-0.209054	72.4821	47.4167	119.899	-0.209054	4
od	2	205	15	Wed	LL	LR	1	95.4887	59.7279	155.217			285		-0.230393	95.4887	59.7279	155.217	-0.230393	5
od	2	205	16	Thu	LL	LR	1	31.6802	22.4435	54.1237			309		-0.170659	31.6802	22.4435	54.1237	-0.170659	1
od	2	205	17	Thu	LL	LR	1	99.4402	50.4955	149.936			313		-0.326438	99.4402	50.4955	149.936	-0.326438	2
od	2	205	18	Thu	LL	LR	1	48.1866	36.6791	84.8657			317		-0.135597	48.1866	36.6791	84.8657	-0.135597	3
od	2	205	19	Thu	LL	LR	1	65.2217	132.761	197.982			321		0.341136	65.2217	132.761	197.982	0.341136	4
od	2	205	20	Thu	LL	LR	1	96.3597	118.78	215.139			325		0.104211	96.3597	118.78	215.139	0.104211	5
od	2	205	21	Fri	LL	UR	1	94.6133	105.231	199.844			333		0.0531288	43.2601	41.9416	85.2017	-0.0154757	1
or	3	205	1	Mon	UR	LR	1	87.4676	65.2358	152.703			357		-0.145588	87.4676	65.2358	152.703	-0.145588	1
or	3	205	2	Mon	UR	LL	1	76.4912	77.091	153.582			361		0.00390508	76.4912	77.091	153.582	0.00390508	2
or	3	205	3	Mon	UR	UL	1	33.6924	53.1945	86.8869			365		0.224453	33.6924	53.1945	86.8869	0.224453	3
or	3	205	4	Mon	UR	LL	1	26.1079	51.2157	77.3236			369		0.324711	26.1079	51.2157	77.3236	0.324711	4
or	3	205	5	Mon	UR	LR	1	53.9915	99.4397	153.431			373		0.296212	53.9915	99.4397	153.431	0.296212	5
or	3	205	6	Tue	UR	LL	1	13.2005	20.0931	33.2935			397		0.207026	13.2005	20.0931	33.2935	0.207026	1
or	3	205	7	Tue	UR	UL	1	42.8942	69.0926	111.987			401		0.233942	42.8942	69.0926	111.987	0.233942	2
or	3	205	8	Tue	UR	LR	1	42.3817	65.9559	108.338			405		0.2176	42.3817	65.9559	108.338	0.2176	3
or	3	205	9	Tue	UR	LR	1	60.024	87.8743	147.898			409		0.188307	60.024	87.8743	147.898	0.188307	4
or	3	205	10	Tue	UR	LL	1	19.0921	76.1947	95.2868			413		0.599271	19.0921	76.1947	95.2868	0.599271	5
or	3	205	11	Wed	UR	UL	1	14.9364	33.5646	48.501			437		0.384078	14.9364	33.5646	48.501	0.384078	1
or	3	205	12	Wed	UR	LR	1	28.9756	33.5599	62.5355			441		0.0733079	28.9756	33.5599	62.5355	0.0733079	2
or	3	205	13	Wed	UR	LL	1	41.2097	108.334	149.543			445		0.448859	41.2097	108.334	149.543	0.448859	3
or	3	205	14	Wed	UR	LR	1	14.3035	40.6736	54.9771			449		0.479657	14.3035	40.6736	54.9771	0.479657	4
or	3	205	15	Wed	UR	LL	1	34.0184	149.463	183.481			453		0.62919	34.0184	149.463	183.481	0.62919	5
or	3	205	16	Thu	UR	LL	1	33.4944	43.2127	76.707			477		0.126694	33.4944	43.2127	76.707	0.126694	1
or	3	205	17	Thu	UR	LR	1	24.3959	41.3114	65.7073			481		0.257437	24.3959	41.3114	65.7073	0.257437	2
or	3	205	18	Thu	UR	LR	1	71.7215	88.7185	160.44			485		0.10594	71.7215	88.7185	160.44	0.10594	3
or	3	205	19	Thu	UR	LL	1	70.0161	66.0197	136.036			489		-0.0293777	70.0161	66.0197	136.036	-0.0293777	4
or	3	205	20	Thu	UR	UL	1	39.6965	72.1005	111.797			493		0.289847	39.6965	72.1005	111.797	0.289847	5
or	3	205	21	Fri	UR	UL	1	101.79	192.288	294.078			501		0.307735	52.3966	77.8942	130.291	0.195698	1
or	1	206	1	Mon	UL	LR	1	53.1053	96.8397	149.945			22		0.29167	53.1053	96.8397	149.945	0.29167	1
or	1	206	2	Mon	UL	LL	1	42.2969	54.8857	97.1827			26		0.129537	42.2969	54.8857	97.1827	0.129537	2
or	1	206	3	Mon	UL	UR	1	39.1008	43.7962	82.897			30		0.0566411	39.1008	43.7962	82.897	0.0566411	3
or	1	206	4	Mon	UL	LR	1	53.9887	98.1454	152.134			34		0.290249	53.9887	98.1454	152.134	0.290249	4
or	1	206	5	Mon	UL	LL	1	131.111	57.5076	188.618			38		-0.390222	131.111	57.5076	188.618	-0.390222	5
or	1	206	6	Tue	UL	UR	1	35.8198	39.9594	75.7791			62		0.0546273	35.8198	39.9594	75.7791	0.0546273	1
or	1	206	7	Tue	UL	LR	1	86.364	107.456	193.82			66		0.108824	86.364	107.456	193.82	0.108824	2
or	1	206	8	Tue	UL	LL	1	21.4965	22.0967	43.5932			70		0.0137682	21.4965	22.0967	43.5932	0.0137682	3
or	1	206	9	Tue	UL	LR	1	49.9546	66.4609	116.415			74		0.141788	49.9546	66.4609	116.415	0.141788	4
or	1	206	10	Tue	UL	LL	1	67.5967	56.0404	123.637			78		-0.0934691	67.5967	56.0404	123.637	-0.0934691	5
or	1	206	11	Wed	UL	LL	1	74.3189	33.6004	107.919			102		-0.377305	74.3189	33.6004	107.919	-0.377305	1
or	1	206	12	Wed	UL	UR	1	43.3967	103.097	146.494			106		0.407528	43.3967	103.097	146.494	0.407528	2
or	1	206	13	Wed	UL	LR	1	35.5001	129.896	165.396			110		0.570727	35.5001	129.896	165.396	0.570727	3
or	1	206	14	Wed	UL	LR	1	87.3958	95.5857	182.982			114		0.0447578	87.3958	95.5857	182.982	0.0447578	4
or	1	206	15	Wed	UL	LL	1	106.207	132.703	238.91			118		0.110907	106.207	132.703	238.91	0.110907	5
or	1	206	16	Thu	UL	LL	1	55.396	62.3971	117.793			142		0.0594358	55.396	62.2132	117.609	0.0579652	1
or	1	206	17	Thu	UL	LR	1	90.9875	102.992	193.979			146		0.0618835	90.5039	102.992	193.495	0.0645375	2
or	1	206	18	Thu	UL	LL	1	52.1031	80.0074	132.111			150		0.211219	52.1031	80.0074	132.111	0.211219	3
or	1	206	19	Thu	UL	LR	1	110.387	83.9999	194.387			154		-0.135747	110.387	83.9999	194.387	-0.135747	4
or	1	206	20	Thu	UL	UR	1	45.1802	40.0437	85.2239			158		-0.0602698	45.1802	40.0437	85.2239	-0.0602698	5
or	1	206	21	Fri	UL	UR	1	66	37.502	103.502			166		-0.275337	43.8012	10.0008	53.802	-0.628237	1
od	2	206	1	Mon	UR	UL	1	72.5987	14.0878	86.6865			190		-0.67497	72.5987	14.0878	86.6865	-0.67497	1
od	2	206	2	Mon	UR	UL	1	69.6214	68.2016	137.823			194		-0.0103017	69.6214	68.2016	137.823	-0.0103017	2
od	2	206	3	Mon	UR	UL	1	37.1823	31.6818	68.8641			198		-0.0798741	37.1823	31.6818	68.8641	-0.0798741	3
od	2	206	4	Mon	UR	UL	1	65.5766	40.2855	105.862			202		-0.238905	65.5766	40.2855	105.862	-0.238905	4
od	2	206	5	Mon	UR	UL	1	64.7943	100.436	165.231			206		0.215711	64.7943	100.436	165.231	0.215711	5
od	2	206	6	Tue	UR	UL	1	23.5487	54.2191	77.7678			230		0.394384	23.5487	54.2191	77.7678	0.394384	1
od	2	206	7	Tue	UR	UL	1	85.3889	94.6274	180.016			234		0.0513204	85.3889	94.6274	180.016	0.0513204	2
od	2	206	8	Tue	UR	UL	1	24.8879	29.1369	54.0249			238		0.0786491	24.8879	29.1369	54.0249	0.0786491	3
od	2	206	9	Tue	UR	UL	1	49.5815	76.4204	126.002			242		0.213004	49.5815	76.4204	126.002	0.213004	4
od	2	206	10	Tue	UR	UL	1	39.2684	46.4205	85.6889			246		0.0834665	39.2684	46.4205	85.6889	0.0834665	5
od	2	206	11	Wed	UR	UL	1	32.8747	32.1616	65.0362			270		-0.0109646	32.8747	32.1616	65.0362	-0.0109646	1
od	2	206	12	Wed	UR	UL	1	27.2296	37.3199	64.5495			274		0.156319	27.2296	37.3199	64.5495	0.156319	2
od	2	206	13	Wed	UR	UL	1	9.34402	16.8325	26.1765			278		0.286076	9.34402	16.8325	26.1765	0.286076	3
od	2	206	14	Wed	UR	UL	1	22.6653	41.7017	64.367			282		0.295748	22.6653	41.7017	64.367	0.295748	4
od	2	206	15	Wed	UR	UL	1	48.9481	25.3195	74.2676			286		-0.318154	48.9481	25.3195	74.2676	-0.318154	5
od	2	206	16	Thu	UR	UL	1	20.8747	27.7196	48.5943			310		0.140857	20.8747	27.7196	48.5943	0.140857	1
od	2	206	17	Thu	UR	UL	1	47.8123	36.5964	84.4088			314		-0.132876	47.8123	36.5964	84.4088	-0.132876	2
od	2	206	18	Thu	UR	UL	1	12.6448	25.7404	38.3852			318		0.341162	12.6448	25.7404	38.3852	0.341162	3
od	2	206	19	Thu	UR	UL	1	39.3671	131.496	170.863			322		0.539196	39.3671	131.496	170.863	0.539196	4
od	2	206	20	Thu	UR	UL	1	108.472	89.1498	197.621			326		-0.0977719	108.472	89.1498	197.621	-0.0977719	5
od	2	206	21	Fri	UR	LL	1	55.0808	111.361	166.442			334		0.338137	40.0848	52.2024	92.2872	0.131302	1
con	3	206	1	Mon	LL	UL	1	129.696	51.3019	180.998			358		-0.433122	129.696	51.3019	180.998	-0.433122	1
con	3	206	2	Mon	LR	UL	1	77.5055	49.0837	126.589			362		-0.224521	77.5055	49.0837	126.589	-0.224521	2
con	3	206	3	Mon	UR	UL	1	8.80987	25.0208	33.8306			366		0.479178	8.80987	25.0208	33.8306	0.479178	3
con	3	206	4	Mon	LR	LL	1	38.8783	33.392	72.2702			370		-0.0759134	38.8783	33.392	72.2702	-0.0759134	4
con	3	206	5	Mon	LR	UR	1	47.3003	41.9004	89.2006			374		-0.0605368	47.3003	41.9004	89.2006	-0.0605368	5
con	3	206	6	Tue	LR	LL	1	10.9005	79.7835	90.684			398		0.759594	10.9005	79.7835	90.684	0.759594	1
con	3	206	7	Tue	UR	LL	1	22.864	87.0185	109.882			402		0.583846	22.864	87.0185	109.882	0.583846	2
con	3	206	8	Tue	UR	LR	1	29.8001	50.0951	79.8952			406		0.254021	29.8001	50.0951	79.8952	0.254021	3
con	3	206	9	Tue	UL	UR	1	49.8993	27.0974	76.9968			410		-0.296141	49.8993	27.0974	76.9968	-0.296141	4
con	3	206	10	Tue	LL	LR	1	64.509	30.401	94.9101			414		-0.359372	64.509	30.401	94.9101	-0.359372	5
con	3	206	11	Wed	LL	UL	1	36.2621	17.7813	54.0435			438		-0.341962	36.2621	17.7813	54.0435	-0.341962	1
con	3	206	12	Wed	UR	LR	1	25.8529	26.6983	52.5512			442		0.0160864	25.8529	26.6983	52.5512	0.0160864	2
con	3	206	13	Wed	UR	LL	1	51.5048	69.9743	121.479			446		0.152039	51.5048	69.9743	121.479	0.152039	3
con	3	206	14	Wed	LR	LL	1	33.7996	32.1003	65.8999			450		-0.0257858	33.7996	32.1003	65.8999	-0.0257858	4
con	3	206	15	Wed	UL	UR	1	88.1874	101.485	189.672			454		0.0701076	88.1874	101.485	189.672	0.0701076	5
con	3	206	16	Thu	UR	UL	1	29.1975	34.6061	63.8037			478		0.0847695	29.1975	34.6061	63.8037	0.0847695	1
con	3	206	17	Thu	LR	UL	1	42.0049	33.5106	75.5155			482		-0.112484	42.0049	33.5106	75.5155	-0.112484	2
con	3	206	18	Thu	LL	LR	1	72.9106	77.9681	150.879			486		0.0335204	72.9106	77.9681	150.879	0.0335204	3
con	3	206	19	Thu	UL	UR	1	34.8412	30.6052	65.4464			490		-0.064724	34.8412	30.6052	65.4464	-0.064724	4
con	3	206	20	Thu	LR	LL	1	21.0601	82.5447	103.605			494		0.593454	21.0601	82.5447	103.605	0.593454	5
con	3	206	21	Fri	UR	UL	1	74.8815	172.794	247.676			502		0.395326	27.8109	97.3929	125.204	0.55575	1
od	1	207	1	Mon	UL	UR	1	72.3895	47.8998	120.289			23		-0.20359	72.3895	47.8998	120.289	-0.20359	1
od	1	207	2	Mon	UL	UR	1	44.2953	42.8007	87.096			27		-0.0171598	44.2953	42.8007	87.096	-0.0171598	2
od	1	207	3	Mon	UL	UR	1	64.8907	27.4588	92.3495			31		-0.405328	64.8907	27.4588	92.3495	-0.405328	3
od	1	207	4	Mon	UL	UR	1	46.3424	40.8602	87.2026			35		-0.0628669	46.3424	40.8602	87.2026	-0.0628669	4
od	1	207	5	Mon	UL	UR	1	72.5907	83.9966	156.587			39		0.0728406	72.5907	83.9966	156.587	0.0728406	5
od	1	207	6	Tue	UL	UR	1	52.5631	38.3358	90.8989			63		-0.156517	52.5631	38.3358	90.8989	-0.156517	1
od	1	207	7	Tue	UL	UR	1	116.89	39.2445	156.135			67		-0.497299	116.89	39.2445	156.135	-0.497299	2
od	1	207	8	Tue	UL	UR	1	18.1838	21.1512	39.335			71		0.0754404	18.1838	21.1512	39.335	0.0754404	3
od	1	207	9	Tue	UL	UR	1	51.2987	55.616	106.915			75		0.0403809	51.2987	55.616	106.915	0.0403809	4
od	1	207	10	Tue	UL	UR	1	71.6398	33.6605	105.3			79		-0.360675	71.6398	33.6605	105.3	-0.360675	5
od	1	207	11	Wed	UL	UR	1	37.2937	69.7012	106.995			103		0.302888	37.2937	69.7012	106.995	0.302888	1
od	1	207	12	Wed	UL	UR	1	98.0834	79.3936	177.477			107		-0.105308	98.0834	79.3936	177.477	-0.105308	2
od	1	207	13	Wed	UL	UR	1	75.2434	52.4655	127.709			111		-0.178357	75.2434	52.4655	127.709	-0.178357	3
od	1	207	14	Wed	UL	UR	1	93.401	75.7864	169.187			115		-0.104113	93.401	75.7864	169.187	-0.104113	4
od	1	207	15	Wed	UL	UR	1	164.481	77.3082	241.79			119		-0.360534	164.481	77.3082	241.79	-0.360534	5
od	1	207	16	Thu	UL	UR	1	78.0951	53.6936	131.789			143		-0.185156	78.0951	53.6936	131.789	-0.185156	1
od	1	207	17	Thu	UL	UR	1	112.496	72.5005	184.996			147		-0.216194	112.496	72.5005	184.996	-0.216194	2
od	1	207	18	Thu	UL	UR	1	62.7552	50.4838	113.239			151		-0.108368	62.6196	50.4838	113.103	-0.107298	3
od	1	207	19	Thu	UL	UR	1	117.291	70.5982	187.889			155		-0.248513	117.007	70.5982	187.605	-0.247376	4
od	1	207	20	Thu	UL	UR	1	57.6868	36.5438	94.2305			159		-0.224375	57.6868	36.5438	94.2305	-0.224375	5
od	1	207	21	Fri	UL	LR	1	88.7181	96.9982	185.716			167		0.0445847	43.2003	59.7996	103	0.161159	1
or	2	207	1	Mon	LR	LL	1	52.0735	27.7223	79.7958			191		-0.30517	52.0735	27.7223	79.7958	-0.30517	1
or	2	207	2	Mon	LR	UR	1	114.967	61.4318	176.399			195		-0.303489	114.967	61.4318	176.399	-0.303489	2
or	2	207	3	Mon	LR	UL	1	90.3225	49.6619	139.984			199		-0.290465	90.3225	49.6619	139.984	-0.290465	3
or	2	207	4	Mon	LR	LL	1	68.5777	77.5232	146.101			203		0.0612281	68.5777	77.5232	146.101	0.0612281	4
or	2	207	5	Mon	LR	UR	1	84.2245	77.6234	161.848			207		-0.0407859	84.2245	77.6234	161.848	-0.0407859	5
or	2	207	6	Tue	LR	UR	1	65.6338	58.4361	124.07			231		-0.0580136	65.6338	58.4361	124.07	-0.0580136	1
or	2	207	7	Tue	LR	UL	1	96.7125	117.124	213.836			235		0.0954518	96.7125	117.124	213.836	0.0954518	2
or	2	207	8	Tue	LR	LL	1	79.251	42.6595	121.911			239		-0.30015	79.251	42.6595	121.911	-0.30015	3
or	2	207	9	Tue	LR	LL	1	82.2307	66.3839	148.615			243		-0.10663	82.2307	66.3839	148.615	-0.10663	4
or	2	207	10	Tue	LR	UR	1	86.9968	38.636	125.633			247		-0.384937	86.9968	38.636	125.633	-0.384937	5
or	2	207	11	Wed	LR	LL	1	32.1138	44.7564	76.8702			271		0.164466	32.1138	44.7564	76.8702	0.164466	1
or	2	207	12	Wed	LR	UR	1	66.5482	26.7281	93.2763			275		-0.426905	66.5482	26.7281	93.2763	-0.426905	2
or	2	207	13	Wed	LR	UL	1	24.0872	38.7044	62.7915			279		0.232789	24.0872	38.7044	62.7915	0.232789	3
or	2	207	14	Wed	LR	UR	1	52.9057	51.3702	104.276			283		-0.0147259	52.9057	51.3702	104.276	-0.0147259	4
or	2	207	15	Wed	LR	LL	1	57.3047	71.9421	129.247			287		0.113252	57.3047	71.9421	129.247	0.113252	5
or	2	207	16	Thu	LR	UR	1	38.1573	15.7551	53.9124			311		-0.41553	38.1573	15.7551	53.9124	-0.41553	1
or	2	207	17	Thu	LR	LL	1	67.3203	65.6651	132.985			315		-0.0124469	67.3203	65.6651	132.985	-0.0124469	2
or	2	207	18	Thu	LR	UR	1	62.5106	52.1439	114.655			319		-0.0904166	62.5106	52.1439	114.655	-0.0904166	3
or	2	207	19	Thu	LR	LL	1	90.1076	115.788	205.896			323		0.124727	90.1076	115.788	205.896	0.124727	4
or	2	207	20	Thu	LR	UL	1	74.7419	155.637	230.378			327		0.351138	74.7419	155.637	230.378	0.351138	5
or	2	207	21	Fri	LR	UL	1	130.572	139.338	269.91			335		0.032478	47.6261	92.4738	140.1	0.320113	1
con	3	207	1	Mon	UR	LL	1	29.5907	70.4779	100.069			359		0.408592	29.5907	70.4779	100.069	0.408592	1
con	3	207	2	Mon	UR	UL	1	67.5053	39.5918	107.097			363		-0.260638	67.5053	39.5918	107.097	-0.260638	2
con	3	207	3	Mon	UR	LR	1	46.8894	46.8885	93.778			367		-9.38387e-06	46.8894	46.8885	93.778	-9.38387e-06	3
con	3	207	4	Mon	UL	UR	1	46.8838	31.0627	77.9465			371		-0.202974	46.8838	31.0627	77.9465	-0.202974	4
con	3	207	5	Mon	LR	LL	1	75.6963	64.2006	139.897			375		-0.0821722	75.6963	64.2006	139.897	-0.0821722	5
con	3	207	6	Tue	LR	UL	1	23.3073	33.5869	56.8943			399		0.180679	23.3073	33.5869	56.8943	0.180679	1
con	3	207	7	Tue	LL	UL	1	58.8961	63.4905	122.387			403		0.0375402	58.8961	63.4905	122.387	0.0375402	2
con	3	207	8	Tue	LR	LL	1	26.6375	61.564	88.2015			407		0.395986	26.6375	61.564	88.2015	0.395986	3
con	3	207	9	Tue	UL	UR	1	64.4885	57.2891	121.778			411		-0.0591195	64.4885	57.2891	121.778	-0.0591195	4
con	3	207	10	Tue	LL	LR	1	55.0808	52.5648	107.646			415		-0.0233737	55.0808	52.5648	107.646	-0.0233737	5
con	3	207	11	Wed	UR	LR	1	31.187	35.5217	66.7087			439		0.0649786	31.187	35.5217	66.7087	0.0649786	1
con	3	207	12	Wed	LL	UL	1	40.2207	45.6129	85.8336			443		0.0628222	40.2207	45.6129	85.8336	0.0628222	2
con	3	207	13	Wed	UR	LL	1	45.6798	40.1265	85.8064			447		-0.0647194	45.6798	40.1265	85.8064	-0.0647194	3
con	3	207	14	Wed	UL	UR	1	19.798	17.4955	37.2935			451		-0.0617384	19.798	17.4955	37.2935	-0.0617384	4
con	3	207	15	Wed	LR	LL	1	128.387	105.186	233.573			455		-0.0993298	128.387	105.186	233.573	-0.0993298	5
con	3	207	16	Thu	UR	UL	1	53.9071	26.3711	80.2782			479		-0.343007	53.9071	26.3711	80.2782	-0.343007	1
con	3	207	17	Thu	LR	LL	1	52.8297	52.8278	105.658			483		-1.75757e-05	52.8297	52.8278	105.658	-1.75757e-05	2
con	3	207	18	Thu	UL	LR	1	94.4243	96.321	190.745			487		0.00994387	94.4243	96.321	190.745	0.00994387	3
con	3	207	19	Thu	UR	LL	1	97.3075	56.7048	154.012			491		-0.263633	97.3075	56.7048	154.012	-0.263633	4
con	3	207	20	Thu	UL	LR	1	70.3165	73.2184	143.535			495		0.0202175	70.3165	73.2184	143.535	0.0202175	5
con	3	207	21	Fri	LL	UR	1	136.778	196.381	333.159			503		0.178902	92.7216	89.9928	182.714	-0.0149345	1
con	1	208	1	Mon	LL	UL	1	112.486	48.0585	160.544			24		-0.401305	112.486	48.0585	160.544	-0.401305	1
con	1	208	2	Mon	UR	LL	1	32.5924	69.2952	101.888			28		0.360228	32.5924	69.2952	101.888	0.360228	2
con	1	208	3	Mon	UR	UL	1	22.9999	54.5958	77.5957			32		0.407187	22.9999	54.5958	77.5957	0.407187	3
con	1	208	4	Mon	UL	LR	1	64.0993	81.2872	145.387			36		0.118222	64.0993	81.2872	145.387	0.118222	4
con	1	208	5	Mon	LL	UR	1	86.6965	82.341	169.037			40		-0.0257663	86.6965	82.341	169.037	-0.0257663	5
con	1	208	6	Tue	LR	LL	1	27.4992	30.5961	58.0953			64		0.0533067	27.4992	30.5961	58.0953	0.0533067	1
con	1	208	7	Tue	LR	UL	1	60.4758	113.139	173.615			68		0.303333	60.4758	113.139	173.615	0.303333	2
con	1	208	8	Tue	UR	LR	1	42.7485	23.5763	66.3248			72		-0.289065	42.7485	23.5763	66.3248	-0.289065	3
con	1	208	9	Tue	LL	UR	1	109.125	54.3808	163.506			76		-0.334817	109.125	54.3808	163.506	-0.334817	4
con	1	208	10	Tue	LR	UL	1	29.4283	98.093	127.521			80		0.538457	29.4283	98.093	127.521	0.538457	5
con	1	208	11	Wed	UR	UL	1	45.2004	70.7964	115.997			104		0.220661	45.2004	70.7964	115.997	0.220661	1
con	1	208	12	Wed	LR	UL	1	86.4016	113.698	200.099			108		0.136412	86.4016	113.698	200.099	0.136412	2
con	1	208	13	Wed	LR	LL	1	47.0007	82.0922	129.093			112		0.271831	47.0007	82.0922	129.093	0.271831	3
con	1	208	14	Wed	LL	UR	1	68.216	93.7209	161.937			116		0.157499	68.216	93.7209	161.937	0.157499	4
con	1	208	15	Wed	LR	UL	1	61.1004	146.186	207.286			120		0.410473	61.1004	146.186	207.286	0.410473	5
con	1	208	16	Thu	LL	UL	1	107.603	87.9913	195.594			144		-0.100268	107.603	87.7081	195.311	-0.101864	1
con	1	208	17	Thu	UR	LR	1	80.9893	117.201	198.19			148		0.182713	80.9893	116.617	197.606	0.180296	2
con	1	208	18	Thu	LR	LL	1	80.4563	51.6556	132.112			152		-0.218003	80.4563	51.6556	132.112	-0.218003	3
con	1	208	19	Thu	UL	UR	1	96.5998	72.2804	168.88			156		-0.144004	96.5998	72.2804	168.88	-0.144004	4
con	1	208	20	Thu	LL	UL	1	39.9448	58.504	98.4488			160		0.188517	39.9448	58.504	98.4488	0.188517	5
con	1	208	21	Fri	UR	LL	1	67.2223	134.016	201.238			168		0.331914	28.8877	33.4838	62.3715	0.0736893	1
or	2	208	1	Mon	LL	UL	1	64.3494	46.9721	111.322			192		-0.1561	64.3494	46.9721	111.322	-0.1561	1
or	2	208	2	Mon	LL	UR	1	100.357	92.7225	193.08			196		-0.0395419	100.357	92.7225	193.08	-0.0395419	2
or	2	208	3	Mon	LL	LR	1	74.236	46.1663	120.402			200		-0.233132	74.236	46.1663	120.402	-0.233132	3
or	2	208	4	Mon	LL	UL	1	75.9276	78.6184	154.546			204		0.0174106	75.9276	78.6184	154.546	0.0174106	4
or	2	208	5	Mon	LL	UR	1	129.11	77.9902	207.1			208		-0.246836	129.11	77.9902	207.1	-0.246836	5
or	2	208	6	Tue	LL	UR	1	86.7921	53.2902	140.082			232		-0.239158	86.7921	53.2902	140.082	-0.239158	1
or	2	208	7	Tue	LL	LR	1	79.5605	129.957	209.517			236		0.240536	79.5605	129.957	209.517	0.240536	2
or	2	208	8	Tue	LL	UL	1	98.5645	45.9885	144.553			240		-0.363714	98.5645	45.9885	144.553	-0.363714	3
or	2	208	9	Tue	LL	UR	1	110.633	54.1116	164.745			244		-0.343087	110.633	54.1116	164.745	-0.343087	4
or	2	208	10	Tue	LL	UL	1	98.0037	50.1561	148.16			248		-0.322946	98.0037	50.1561	148.16	-0.322946	5
or	2	208	11	Wed	LL	LR	1	96.4741	39.0468	135.521			272		-0.423752	96.4741	39.0468	135.521	-0.423752	1
or	2	208	12	Wed	LL	UL	1	66.2167	12.3792	78.596			276		-0.684991	66.2167	12.3792	78.596	-0.684991	2
or	2	208	13	Wed	LL	UR	1	69.4296	37.3927	106.822			280		-0.299909	69.4296	37.3927	106.822	-0.299909	3
or	2	208	14	Wed	LL	UL	1	104.378	73.0196	177.398			284		-0.176769	104.378	73.0196	177.398	-0.176769	4
or	2	208	15	Wed	LL	UR	1	77.1087	54.0094	131.118			288		-0.176172	77.1087	54.0094	131.118	-0.176172	5
or	2	208	16	Thu	LL	UL	1	75.3505	22.3221	97.6727			312		-0.54292	75.3505	22.3221	97.6727	-0.54292	1
or	2	208	17	Thu	LL	UR	1	60.1688	41.9043	102.073			316		-0.178935	60.1688	41.9043	102.073	-0.178935	2
or	2	208	18	Thu	LL	UR	1	90.6444	33.0208	123.665			320		-0.465965	90.6444	33.0208	123.665	-0.465965	3
or	2	208	19	Thu	LL	UL	1	69.6001	115.79	185.39			324		0.24915	69.6001	115.79	185.39	0.24915	4
or	2	208	20	Thu	LL	LR	1	66.9355	123.118	190.054			328		0.295615	66.9355	123.118	190.054	0.295615	5
or	2	208	21	Fri	LL	LR	1	91.8365	83.1599	174.996			336		-0.0495814	48.5544	48.5138	97.0682	-0.000418438	1
od	3	208	1	Mon	LR	LL	1	118.281	83.6828	201.964			360		-0.171309	118.281	83.6828	201.964	-0.171309	1
od	3	208	2	Mon	LR	LL	1	56.702	87.9974	144.699			364		0.216279	56.702	87.9974	144.699	0.216279	2
od	3	208	3	Mon	LR	LL	1	55.7001	48.9956	104.696			368		-0.0640382	55.7001	48.9956	104.696	-0.0640382	3
od	3	208	4	Mon	LR	LL	1	56.6971	61.2911	117.988			372		0.0389364	56.6971	61.2911	117.988	0.0389364	4
od	3	208	5	Mon	LR	LL	1	43.6001	74.789	118.389			376		0.263444	43.6001	74.789	118.389	0.263444	5
od	3	208	6	Tue	LR	LL	1	40.9971	58.4067	99.4038			400		0.175141	40.9971	58.4067	99.4038	0.175141	1
od	3	208	7	Tue	LR	LL	1	55.4258	77.0242	132.45			404		0.163068	55.4258	77.0242	132.45	0.163068	2
od	3	208	8	Tue	LR	LL	1	0	0	0			408			0	0	0	0	3
od	3	208	9	Tue	LR	LL	1	58.0415	57.8655	115.907			412		-0.00151899	58.0415	57.8655	115.907	-0.00151899	4
od	3	208	10	Tue	LR	LL	1	42.1991	68.2963	110.495			416		0.236184	42.1991	68.2963	110.495	0.236184	5
od	3	208	11	Wed	LR	LL	1	63.315	43.442	106.757			440		-0.186152	63.315	43.442	106.757	-0.186152	1
od	3	208	12	Wed	LR	LL	1	51.4745	49.9015	101.376			444		-0.0155171	51.4745	49.9015	101.376	-0.0155171	2
od	3	208	13	Wed	LR	LL	1	52.3402	82.7857	135.126			448		0.225312	52.3402	82.7857	135.126	0.225312	3
od	3	208	14	Wed	LR	LL	1	22.1954	38.8878	61.0831			452		0.273273	22.1954	38.8878	61.0831	0.273273	4
od	3	208	15	Wed	LR	LL	1	118.202	74.3963	192.598			456		-0.227446	118.202	74.3963	192.598	-0.227446	5
od	3	208	16	Thu	LR	LL	1	68.4159	64.8984	133.314			480		-0.0263846	68.4159	64.8984	133.314	-0.0263846	1
od	3	208	17	Thu	LR	LL	1	42.2101	68.4121	110.622			484		0.236861	42.2101	68.4121	110.622	0.236861	2
od	3	208	18	Thu	LR	LL	1	87.9489	77.6911	165.64			488		-0.0619283	87.9489	77.6911	165.64	-0.0619283	3
od	3	208	19	Thu	LR	LL	1	52.4721	76.1586	128.631			492		0.184144	52.4721	76.1586	128.631	0.184144	4
od	3	208	20	Thu	LR	LL	1	51.12	54.5166	105.637			496		0.0321531	51.12	54.5166	105.637	0.0321531	5
od	3	208	21	Fri	LR	UL	1	147.674	209.571	357.245			504		0.173264	89.4427	93.9892	183.432	0.0247857	1
or	1	26923	1	Mon	LL	UL	35	68.0562	57.78	125.836			328		-0.0816633	67.3577	57.78	125.138	-0.0765373	1
or	1	26923	2	Mon	LL	LR	9	81.2816	104.543	185.825			332		0.125181	81.2816	98.2243	179.506	0.0943852	2
or	1	26923	3	Mon	LL	UR	19	72.6455	49.1032	121.749			336		-0.193368	69.1545	43.9989	113.153	-0.222315	3
or	1	26923	4	Mon	LL	UL	4	83.5548	78.3218	161.877			340		-0.032327	82.9823	78.3218	161.304	-0.0288924	4
or	1	26923	5	Mon	LL	LR	24	91.033	83.615	174.648			344		-0.042474	85.8814	83.2642	169.146	-0.0154733	5
or	1	26923	6	Tue	LL	UR	14	86.663	49.7872	136.45			363		-0.270251	86.663	49.2141	135.877	-0.275609	1
or	1	26923	7	Tue	LL	LR	18	62.566	97.8814	160.447			367		0.220106	61.1298	97.8814	159.011	0.231126	2
or	1	26923	8	Tue	LL	UL	8	40.7305	74.3825	115.113			371		0.292339	40.7305	73.6625	114.393	0.287885	3
or	1	26923	9	Tue	LL	UL	28	85.0113	48.8129	133.824			375		-0.270492	85.0113	48.8129	133.824	-0.270492	4
or	1	26923	10	Tue	LL	LR	3	45.7883	60.8948	106.683			379		0.141602	45.7883	60.8948	106.683	0.141602	5
or	1	26923	11	Wed	LL	LR	23	70.5111	50.4719	120.983			398		-0.165637	70.5111	50.4719	120.983	-0.165637	1
or	1	26923	12	Wed	LL	UR	13	72.1414	53.3004	125.442			402		-0.150197	72.1414	53.3004	125.442	-0.150197	2
or	1	26923	13	Wed	LL	UL	10	124.879	68.7295	193.609			406		-0.290016	124.879	68.7295	193.609	-0.290016	3
or	1	26923	14	Wed	LL	LR	2	31.8642	50.1095	81.9737			410		0.222575	31.8642	50.1095	81.9737	0.222575	4
or	1	26923	15	Wed	LL	UL	22	23.7364	40.0957	63.8321			414		0.256286	23.7364	40.0957	63.8321	0.256286	5
or	1	26923	16	Thu	LL	UL	12	15.1051	52.5288	67.6339			433		0.553327	15.1051	52.5288	67.6339	0.553327	1
or	1	26923	17	Thu	LL	LR	27	76.1277	66.6901	142.818			437		-0.0660814	76.1277	66.6901	142.818	-0.0660814	2
or	1	26923	18	Thu	LL	LR	7	36.4504	56.293	92.7434			441		0.213952	36.4504	56.293	92.7434	0.213952	3
or	1	26923	19	Thu	LL	UL	17	44.2531	50.118	94.3711			445		0.062148	44.2531	50.118	94.3711	0.062148	4
or	1	26923	20	Thu	LL	UR	36	46.5494	164.657	211.206			449		0.559205	46.5494	164.657	211.206	0.559205	5
or	1	26923	21	Fri	LL	UR	18	142.468	84.1007	226.569			456		-0.257616	68.4883	47.5593	116.048	-0.180348	1
od	2	26923	1	Mon	LR	UL	11	35.9654	12.3224	48.2878			475		-0.489627	35.9654	12.3224	48.2878	-0.489627	1
od	2	26923	2	Mon	LR	UL	16	69.2571	104.114	173.371			479		0.201052	69.2571	104.114	173.371	0.201052	2
od	2	26923	3	Mon	LR	UL	6	93.1039	76.1958	169.3			483		-0.0998708	93.1039	76.1958	169.3	-0.0998708	3
od	2	26923	4	Mon	LR	UL	26	42.9567	62.3422	105.299			487		0.1841	42.9567	62.3422	105.299	0.1841	4
od	2	26923	5	Mon	LR	UL	30	85.7195	68.4839	154.203			491		-0.111772	85.7195	68.4839	154.203	-0.111772	5
od	2	26923	6	Tue	LR	UL	4	96.2044	80.455	176.659			510		-0.0891511	96.2044	80.455	176.659	-0.0891511	1
od	2	26923	7	Tue	LR	UL	37	92.7193	133.509	226.229			514		0.180305	92.7193	133.509	226.229	0.180305	2
od	2	26923	8	Tue	LR	UL	14	66.9964	67.0795	134.076			518		0.000620089	66.9964	67.0795	134.076	0.000620089	3
od	2	26923	9	Tue	LR	UL	29	46.0376	127.659	173.697			522		0.469909	46.0376	127.659	173.697	0.469909	4
od	2	26923	10	Tue	LR	UL	9	59.1877	106.015	165.203			526		0.283454	59.1877	106.015	165.203	0.283454	5
od	2	26923	11	Wed	LR	UL	19	52.4651	43.34	95.8051			545		-0.0952466	52.4651	43.34	95.8051	-0.0952466	1
od	2	26923	12	Wed	LR	UL	3	46.5504	50.2861	96.8365			549		0.0385771	46.5504	50.2861	96.8365	0.0385771	2
od	2	26923	13	Wed	LR	UL	23	55.6398	53.6294	109.269			553		-0.0183984	55.6398	53.6294	109.269	-0.0183984	3
od	2	26923	14	Wed	LR	UL	13	52.2727	51.1809	103.454			557		-0.0105538	52.2727	51.1809	103.454	-0.0105538	4
od	2	26923	15	Wed	LR	UL	18	82.5271	66.8986	149.426			561		-0.104591	82.5271	66.8986	149.426	-0.104591	5
od	2	26923	16	Thu	LR	UL	8	47.6175	106.267	153.884			580		0.381125	47.6175	106.267	153.884	0.381125	1
od	2	26923	17	Thu	LR	UL	28	66.7059	74.8474	141.553			584		0.0575151	66.7059	74.8474	141.553	0.0575151	2
od	2	26923	18	Thu	LR	UL	7	51.812	45.8729	97.6849			588		-0.0607994	51.812	45.8729	97.6849	-0.0607994	3
od	2	26923	19	Thu	LR	UL	5	25.1636	218.602	243.766			592		0.793543	25.1636	218.602	243.766	0.793543	4
od	2	26923	20	Thu	LR	UL	15	98.582	74.3965	172.978			596		-0.139818	98.582	74.3965	172.978	-0.139818	5
od	2	26923	21	Fri	LR	LL	20	124.107	211.633	335.74			603		0.260698	74.0846	82.4874	156.572	0.0536674	1
con	3	26923	1	Mon	LL	UR	21	59.8381	36.9647	96.8028			622		-0.236288	59.8381	36.9647	96.8028	-0.236288	1
con	3	26923	2	Mon	UL	UR	25	66.4639	85.4801	151.944			626		0.125153	66.4639	85.4801	151.944	0.125153	2
con	3	26923	3	Mon	LR	UR	31	84.684	167.849	252.533			630		0.329322	84.684	167.849	252.533	0.329322	3
con	3	26923	4	Mon	LL	UL	16	101.583	92.135	193.718			634		-0.0487729	101.583	92.135	193.718	-0.0487729	4
con	3	26923	5	Mon	UR	LR	11	54.5837	55.1097	109.693			638		0.00479516	54.5837	55.1097	109.693	0.00479516	5
con	3	26923	6	Tue	UL	LR	32	64.294	127.566	191.86			657		0.329781	64.294	127.566	191.86	0.329781	1
con	3	26923	7	Tue	UL	LL	2	45.0414	58.0289	103.07			661		0.126006	45.0414	58.0289	103.07	0.126006	2
con	3	26923	8	Tue	LL	LR	22	20.8385	29.1431	49.9816			665		0.166152	20.8385	29.1431	49.9816	0.166152	3
con	3	26923	9	Tue	LR	UL	33	87.0024	105.587	192.589			669		0.0964971	87.0024	105.587	192.589	0.0964971	4
con	3	26923	10	Tue	UR	LL	12	33.3119	54.8787	88.1906			673		0.244547	33.3119	54.8787	88.1906	0.244547	5
con	3	26923	11	Wed	UL	LR	5	139.34	90.5832	229.923			692		-0.212055	139.34	90.5832	229.923	-0.212055	1
con	3	26923	12	Wed	LL	LR	17	34.0418	26.3271	60.3689			696		-0.127793	34.0418	26.3271	60.3689	-0.127793	2
con	3	26923	13	Wed	UL	LL	34	22.4295	30.5601	52.9895			700		0.153438	22.4295	30.5601	52.9895	0.153438	3
con	3	26923	14	Wed	UL	UR	27	43.7226	46.8015	90.5241			704		0.0340121	43.7226	46.8015	90.5241	0.0340121	4
con	3	26923	15	Wed	LL	LR	24	25.9756	51.702	77.6775			708		0.331195	25.9756	51.702	77.6775	0.331195	5
con	3	26923	16	Thu	LR	UR	6	74.8179	40.5704	115.388			727		-0.296802	74.8179	40.5704	115.388	-0.296802	1
con	3	26923	17	Thu	LL	UR	15	41.2073	67.324	108.531			731		0.240637	41.2073	67.324	108.531	0.240637	2
con	3	26923	18	Thu	UL	UR	10	102.059	62.1204	164.179			735		-0.243262	102.059	62.1204	164.179	-0.243262	3
con	3	26923	19	Thu	LR	LL	26	44.8748	54.3969	99.2716			739		0.0959197	44.8748	54.3969	99.2716	0.0959197	4
con	3	26923	20	Thu	UL	UR	16	103.058	72.4035	175.462			743		-0.174709	103.058	72.4035	175.462	-0.174709	5
con	3	26923	21	Fri	LR	LL	29	68.0808	56.7434	124.824			750		-0.090827	68.0808	56.7434	124.824	-0.090827	1
or	1	26924	1	Mon	UR	LR	35	67.8626	104.556	172.419			329		0.212816	67.8626	96.5405	164.403	0.174437	1
or	1	26924	2	Mon	UR	LL	9	55.5709	56.4968	112.068			333		0.00826187	54.7557	56.4968	111.252	0.0156499	2
or	1	26924	3	Mon	UR	UL	19	41.9219	31.6185	73.5404			337		-0.140106	41.9219	31.6185	73.5404	-0.140106	3
or	1	26924	4	Mon	UR	LL	4	51.8018	63.8095	115.611			341		0.103862	51.8018	63.8095	115.611	0.103862	4
or	1	26924	5	Mon	UR	LR	24	53.1835	67.4853	120.669			345		0.118521	53.1835	67.4853	120.669	0.118521	5
or	1	26924	6	Tue	UR	LL	14	53.9567	28.703	82.6597			364		-0.305515	53.9567	28.703	82.6597	-0.305515	1
or	1	26924	7	Tue	UR	UL	18	42.6588	82.712	125.371			368		0.319478	42.6588	82.712	125.371	0.319478	2
or	1	26924	8	Tue	UR	LR	8	82.3203	48.6347	130.955			372		-0.25723	82.3203	47.4165	129.737	-0.269036	3
or	1	26924	9	Tue	UR	LR	28	37.2229	31.0776	68.3005			376		-0.0899743	36.4712	31.0776	67.5488	-0.0798469	4
or	1	26924	10	Tue	UR	LL	3	42.2544	37.2528	79.5071			380		-0.0629072	42.2544	37.2528	79.5071	-0.0629072	5
or	1	26924	11	Wed	UR	UL	23	49.3318	42.3322	91.664			399		-0.076361	49.3318	42.3322	91.664	-0.076361	1
or	1	26924	12	Wed	UR	LR	13	41.0092	53.6814	94.6906			403		0.133828	41.0092	53.6814	94.6906	0.133828	2
or	1	26924	13	Wed	UR	LL	10	42.5867	41.6015	84.1882			407		-0.011702	42.5867	41.6015	84.1882	-0.011702	3
or	1	26924	14	Wed	UR	LR	2	32.5887	31.0371	63.6258			411		-0.0243857	32.5887	31.0371	63.6258	-0.0243857	4
or	1	26924	15	Wed	UR	LL	22	28.7693	47.4406	76.2099			415		0.244998	28.7693	47.4406	76.2099	0.244998	5
or	1	26924	16	Thu	UR	LL	12	34.4809	40.7008	75.1817			434		0.0827322	34.4809	40.7008	75.1817	0.0827322	1
or	1	26924	17	Thu	UR	LR	27	42.1417	17.0689	59.2107			438		-0.423451	42.1417	17.0689	59.2107	-0.423451	2
or	1	26924	18	Thu	UR	LR	7	18.3909	24.9648	43.3557			442		0.151627	18.3909	24.9648	43.3557	0.151627	3
or	1	26924	19	Thu	UR	LL	17	13.0412	19.0944	32.1356			446		0.188363	13.0412	19.0944	32.1356	0.188363	4
or	1	26924	20	Thu	UR	UL	36	46.6245	81.8676	128.492			450		0.274282	46.6245	81.8676	128.492	0.274282	5
or	1	26924	21	Fri	UR	UL	18	89.9959	64.8755	154.871			457		-0.162201	33.4556	33.1227	66.5783	-0.00499978	1
con	2	26924	1	Mon	LL	LR	11	25.2874	61.5353	86.8227			476		0.417493	25.2874	61.5353	86.8227	0.417493	1
con	2	26924	2	Mon	UL	LR	16	37.882	49.9809	87.8629			480		0.137702	37.882	49.9809	87.8629	0.137702	2
con	2	26924	3	Mon	LR	UR	6	42.3983	90.0357	132.434			484		0.359707	42.3983	90.0357	132.434	0.359707	3
con	2	26924	4	Mon	UL	UR	26	18.0422	50.7536	68.7958			488		0.475486	18.0422	50.7536	68.7958	0.475486	4
con	2	26924	5	Mon	LL	LR	30	38.9925	45.932	84.9245			492		0.0817134	38.9925	45.932	84.9245	0.0817134	5
con	2	26924	6	Tue	UL	LL	4	24.1594	72.9397	97.0992			511		0.502376	24.1594	72.9397	97.0992	0.502376	1
con	2	26924	7	Tue	LL	UR	37	81.2086	89.6785	170.887			515		0.0495643	81.2086	89.6785	170.887	0.0495643	2
con	2	26924	8	Tue	UL	UR	14	46.503	44.8075	91.3105			519		-0.0185685	46.503	44.8075	91.3105	-0.0185685	3
con	2	26924	9	Tue	LR	LL	29	37.7053	20.679	58.3843			523		-0.291624	37.7053	20.679	58.3843	-0.291624	4
con	2	26924	10	Tue	UR	UL	9	41.3429	32.1588	73.5017			527		-0.124952	41.3429	32.1588	73.5017	-0.124952	5
con	2	26924	11	Wed	LL	LR	19	24.1094	38.6152	62.7246			546		0.231263	24.1094	38.6152	62.7246	0.231263	1
con	2	26924	12	Wed	LL	UR	3	14.0623	35.0177	49.08			550		0.426963	14.0623	35.0177	49.08	0.426963	2
con	2	26924	13	Wed	LR	UR	23	26.2096	28.7771	54.9868			554		0.0466925	26.2096	28.7771	54.9868	0.0466925	3
con	2	26924	14	Wed	LR	LL	13	21.5406	28.6718	50.2124			558		0.142022	21.5406	28.6718	50.2124	0.142022	4
con	2	26924	15	Wed	UR	UL	18	17.1717	40.6646	57.8362			562		0.406196	17.1717	40.6646	57.8362	0.406196	5
con	2	26924	16	Thu	UL	LL	8	62.2377	43.0331	105.271			581		-0.182431	62.2377	43.0331	105.271	-0.182431	1
con	2	26924	17	Thu	UL	LR	28	67.7882	26.5835	94.3718			585		-0.436621	67.7882	26.5835	94.3718	-0.436621	2
con	2	26924	18	Thu	LL	UL	7	56.1472	26.8123	82.9594			589		-0.353605	56.1472	26.8123	82.9594	-0.353605	3
con	2	26924	19	Thu	LR	UR	5	58.3636	187.541	245.905			593		0.525316	58.3636	187.541	245.905	0.525316	4
con	2	26924	20	Thu	UL	UR	15	26.2498	60.7895	87.0393			597		0.39683	26.2498	60.7895	87.0393	0.39683	5
con	2	26924	21	Fri	LL	LR	20	105.464	81.4429	186.906			604		-0.128517	44.7045	47.4835	92.188	0.0301445	1
od	3	26924	1	Mon	LL	LR	21	43.7674	44.1178	87.8852			623		0.00398747	43.7674	44.1178	87.8852	0.00398747	1
od	3	26924	2	Mon	LL	LR	25	33.4063	64.5519	97.9582			627		0.317948	33.4063	64.5519	97.9582	0.317948	2
od	3	26924	3	Mon	LL	LR	31	102.361	105.845	208.207			631		0.0167334	102.361	105.845	208.207	0.0167334	3
od	3	26924	4	Mon	LL	LR	16	53.1094	110.719	163.829			635		0.351648	53.1094	110.719	163.829	0.351648	4
od	3	26924	5	Mon	LL	LR	11	19.4923	45.4812	64.9735			639		0.399993	19.4923	45.4812	64.9735	0.399993	5
od	3	26924	6	Tue	LL	LR	32	50.2531	73.1098	123.363			658		0.185281	50.2531	73.1098	123.363	0.185281	1
od	3	26924	7	Tue	LL	LR	2	31.4967	36.7252	68.2219			662		0.0766388	31.4967	36.7252	68.2219	0.0766388	2
od	3	26924	8	Tue	LL	LR	22	53.8187	39.1677	92.9864			666		-0.157561	53.8187	39.1677	92.9864	-0.157561	3
od	3	26924	9	Tue	LL	LR	33	51.4077	113.486	164.893			670		0.376474	51.4077	113.486	164.893	0.376474	4
od	3	26924	10	Tue	LL	LR	12	35.8181	66.8984	102.716			674		0.302583	35.8181	66.8984	102.716	0.302583	5
od	3	26924	11	Wed	LL	LR	5	60.7151	112.658	173.373			693		0.299603	60.7151	112.658	173.373	0.299603	1
od	3	26924	12	Wed	LL	LR	17	47.1331	66.6	113.733			697		0.171162	47.1331	66.6	113.733	0.171162	2
od	3	26924	13	Wed	LL	LR	34	29.739	28.9361	58.675			701		-0.0136837	29.739	28.9361	58.675	-0.0136837	3
od	3	26924	14	Wed	LL	LR	27	39.4733	29.6987	69.172			705		-0.141308	39.4733	29.6987	69.172	-0.141308	4
od	3	26924	15	Wed	LL	LR	24	18.479	19.7469	38.226			709		0.0331688	18.479	19.7469	38.226	0.0331688	5
od	3	26924	16	Thu	LL	LR	6	46.6888	75.422	122.111			728		0.235304	46.6888	75.422	122.111	0.235304	1
od	3	26924	17	Thu	LL	LR	15	30.3468	20.3308	50.6776			732		-0.197642	30.3468	20.3308	50.6776	-0.197642	2
od	3	26924	18	Thu	LL	LR	10	32.1174	39.3619	71.4793			736		0.101351	32.1174	39.3619	71.4793	0.101351	3
od	3	26924	19	Thu	LL	LR	26	15.317	22.7657	38.0827			740		0.195594	15.317	22.7657	38.0827	0.195594	4
od	3	26924	20	Thu	LL	LR	16	61.7696	64.6549	126.425			744		0.0228228	61.7696	64.6549	126.425	0.0228228	5
od	3	26924	21	Fri	LL	UR	29	43.5774	57.1609	100.738			751		0.134839	43.5774	57.1609	100.738	0.134839	1
con	1	26925	1	Mon	UL	LL	35	98.5164	62.2262	160.743			330		-0.225766	98.5164	62.2222	160.739	-0.225796	1
con	1	26925	2	Mon	UL	LR	9	43.4545	148.4	191.854			334		0.547006	43.008	148.4	191.408	0.550615	2
con	1	26925	3	Mon	UL	UR	19	31.1008	26.0013	57.1021			338		-0.0893044	31.1008	26.0013	57.1021	-0.0893044	3
con	1	26925	4	Mon	LL	LR	4	102.696	75.1874	177.883			342		-0.154642	102.696	75.1874	177.883	-0.154642	4
con	1	26925	5	Mon	UR	LR	24	54.9369	49.8384	104.775			346		-0.0486618	54.9369	49.8384	104.775	-0.0486618	5
con	1	26925	6	Tue	LL	LR	14	30.4882	48.9398	79.428			365		0.232307	30.2511	48.9398	79.1909	0.235995	1
con	1	26925	7	Tue	LL	UR	18	36.306	67.3139	103.62			369		0.299246	36.306	67.3139	103.62	0.299246	2
con	1	26925	8	Tue	LR	UR	8	53.9293	38.6309	92.5601			373		-0.165281	53.9293	38.6309	92.5601	-0.165281	3
con	1	26925	9	Tue	UR	UL	28	44.7791	84.8529	129.632			377		0.309136	44.7791	84.8529	129.632	0.309136	4
con	1	26925	10	Tue	LR	LL	3	13.5835	30.0272	43.6107			381		0.377056	13.5835	28.8107	42.3942	0.35918	5
con	1	26925	11	Wed	UL	LL	23	62.6683	40.1791	102.847			400		-0.218666	62.6683	40.1791	102.847	-0.218666	1
con	1	26925	12	Wed	LR	UR	13	27.7511	31.631	59.3821			404		0.0653365	27.7511	31.631	59.3821	0.0653365	2
con	1	26925	13	Wed	LL	UR	10	28.5498	34.8883	63.4381			408		0.0999167	28.5498	34.8883	63.4381	0.0999167	3
con	1	26925	14	Wed	LL	LR	2	30.0918	26.9678	57.0596			412		-0.0547494	30.0918	26.9678	57.0596	-0.0547494	4
con	1	26925	15	Wed	UR	UL	22	18.2543	25.205	43.4593			416		0.159937	18.2543	25.205	43.4593	0.159937	5
con	1	26925	16	Thu	UL	UR	12	39.8563	39.4619	79.3182			435		-0.00497272	39.8563	39.4619	79.3182	-0.00497272	1
con	1	26925	17	Thu	UL	LR	27	22.1876	44.7343	66.9219			439		0.336911	22.1876	44.7343	66.9219	0.336911	2
con	1	26925	18	Thu	LR	LL	7	15.1604	15.996	31.1564			443		0.0268205	15.1604	15.996	31.1564	0.0268205	3
con	1	26925	19	Thu	UR	UL	17	26.2205	33.7829	60.0034			447		0.126034	26.2205	33.7829	60.0034	0.126034	4
con	1	26925	20	Thu	LL	LR	36	45.6246	62.2038	107.828			451		0.153756	45.6246	62.2038	107.828	0.153756	5
con	1	26925	21	Fri	UL	UR	18	68.1311	71.0546	139.186			458		0.0210044	32.9338	21.9424	54.8762	-0.200295	1
od	2	26925	1	Mon	UR	UL	11	46.487	56.082	102.569			477		0.0935464	46.487	56.082	102.569	0.0935464	1
od	2	26925	2	Mon	UR	UL	16	77.7511	39.9101	117.661			481		-0.321609	77.7511	39.9101	117.661	-0.321609	2
od	2	26925	3	Mon	UR	UL	6	32.7422	48.9251	81.6673			485		0.198157	32.7422	48.9251	81.6673	0.198157	3
od	2	26925	4	Mon	UR	UL	26	28.5084	12.9912	41.4995			489		-0.373912	28.5084	12.9912	41.4995	-0.373912	4
od	2	26925	5	Mon	UR	UL	30	16.4488	19.6989	36.1477			493		0.0899111	16.4488	19.6989	36.1477	0.0899111	5
od	2	26925	6	Tue	UR	UL	4	66.6565	60.5665	127.223			512		-0.047869	66.6565	60.5665	127.223	-0.047869	1
od	2	26925	7	Tue	UR	UL	37	113.711	62.028	175.739			516		-0.294091	113.711	62.028	175.739	-0.294091	2
od	2	26925	8	Tue	UR	UL	14	42.7268	35.6659	78.3927			520		-0.0900711	42.7268	35.6659	78.3927	-0.0900711	3
od	2	26925	9	Tue	UR	UL	29	32.6262	20.0137	52.6399			524		-0.239599	32.6262	20.0137	52.6399	-0.239599	4
od	2	26925	10	Tue	UR	UL	9	59.4071	17.0654	76.4726			528		-0.553685	59.4071	17.0654	76.4726	-0.553685	5
od	2	26925	11	Wed	UR	UL	19	27.3657	70.5435	97.9092			547		0.440998	27.3657	70.5435	97.9092	0.440998	1
od	2	26925	12	Wed	UR	UL	3	22.6159	49.589	72.2049			551		0.373565	22.6159	49.589	72.2049	0.373565	2
od	2	26925	13	Wed	UR	UL	23	28.8328	43.9712	72.804			555		0.207933	28.8328	43.9712	72.804	0.207933	3
od	2	26925	14	Wed	UR	UL	13	35.2709	22.5353	57.8062			559		-0.220316	35.2709	22.5353	57.8062	-0.220316	4
od	2	26925	15	Wed	UR	UL	18	41.645	41.6517	83.2967			563		8.04353e-05	41.645	41.6517	83.2967	8.04353e-05	5
od	2	26925	16	Thu	UR	UL	8	40.3275	32.7349	73.0624			582		-0.103919	40.3275	32.7349	73.0624	-0.103919	1
od	2	26925	17	Thu	UR	UL	28	59.5412	63.9739	123.515			586		0.0358877	59.5412	63.9739	123.515	0.0358877	2
od	2	26925	18	Thu	UR	UL	7	10.4404	28.7417	39.1821			590		0.467082	10.4404	28.7417	39.1821	0.467082	3
od	2	26925	19	Thu	UR	UL	5	58.1766	110.081	168.258			594		0.308482	58.1766	110.081	168.258	0.308482	4
od	2	26925	20	Thu	UR	UL	15	37.4479	61.6958	99.1437			598		0.244573	37.4479	61.6958	99.1437	0.244573	5
od	2	26925	21	Fri	UR	LL	20	42.4597	109.098	151.558			605		0.439689	35.5031	62.3072	97.8104	0.274042	1
or	3	26925	1	Mon	UL	LR	21	44.2467	24.049	68.2956			624		-0.295739	44.2467	24.049	68.2956	-0.295739	1
or	3	26925	2	Mon	UL	LL	25	60.5087	28.0974	88.6061			628		-0.365791	60.5087	28.0974	88.6061	-0.365791	2
or	3	26925	3	Mon	UL	UR	31	65.7653	67.0079	132.773			632		0.0093592	65.7653	67.0079	132.773	0.0093592	3
or	3	26925	4	Mon	UL	LR	16	70.2493	72.3919	142.641			636		0.0150211	70.2493	72.3919	142.641	0.0150211	4
or	3	26925	5	Mon	UL	LL	11	35.2244	33.6029	68.8273			640		-0.0235595	35.2244	33.6029	68.8273	-0.0235595	5
or	3	26925	6	Tue	UL	UR	32	70.843	42.2195	113.062			659		-0.253166	70.843	42.2195	113.062	-0.253166	1
or	3	26925	7	Tue	UL	LR	2	22.1614	21.3473	43.5087			663		-0.0187125	22.1614	21.3473	43.5087	-0.0187125	2
or	3	26925	8	Tue	UL	LL	22	15.0193	18.8458	33.8651			667		0.112994	15.0193	18.8458	33.8651	0.112994	3
or	3	26925	9	Tue	UL	LR	33	39.1223	53.0572	92.1795			671		0.151172	39.1223	53.0572	92.1795	0.151172	4
or	3	26925	10	Tue	UL	LL	12	64.9267	29.6423	94.569			675		-0.373107	64.9267	29.6423	94.569	-0.373107	5
or	3	26925	11	Wed	UL	LL	5	68.3815	53.9267	122.308			694		-0.118184	68.3815	53.9267	122.308	-0.118184	1
or	3	26925	12	Wed	UL	UR	17	10.3552	31.1332	41.4884			698		0.500813	10.3552	31.1332	41.4884	0.500813	2
or	3	26925	13	Wed	UL	LR	34	18.0293	24.1394	42.1687			702		0.144898	18.0293	24.1394	42.1687	0.144898	3
or	3	26925	14	Wed	UL	LR	27	21.6905	31.8673	53.5577			706		0.190016	21.6905	31.8673	53.5577	0.190016	4
or	3	26925	15	Wed	UL	LL	24	15.6973	20.109	35.8063			710		0.123209	15.6973	20.109	35.8063	0.123209	5
or	3	26925	16	Thu	UL	LL	6	15.0013	50.305	65.3064			729		0.540586	15.0013	50.305	65.3064	0.540586	1
or	3	26925	17	Thu	UL	LR	15	18.5199	16.4543	34.9742			733		-0.059059	18.5199	16.4543	34.9742	-0.059059	2
or	3	26925	18	Thu	UL	LL	10	49.4397	32.1503	81.59			737		-0.211906	49.4397	32.1503	81.59	-0.211906	3
or	3	26925	19	Thu	UL	LR	26	12.8829	20.2293	33.1122			741		0.221861	12.8829	20.2293	33.1122	0.221861	4
or	3	26925	20	Thu	UL	UR	16	43.7071	17.0093	60.7164			745		-0.439714	43.7071	17.0093	60.7164	-0.439714	5
or	3	26925	21	Fri	UL	UR	29	19.4867	34.4457	53.9324			752		0.277366	19.4867	34.4457	53.9324	0.277366	1
od	1	26926	1	Mon	UL	UR	35	97.5959	56.1369	153.733			331		-0.269682	97.5959	54.697	152.293	-0.281687	1
od	1	26926	2	Mon	UL	UR	9	93.521	28.7168	122.238			335		-0.530149	90.8942	28.7168	119.611	-0.51983	2
od	1	26926	3	Mon	UL	UR	19	35.7939	36.8263	72.6201			339		0.0142168	35.5972	36.8263	72.4235	0.0169707	3
od	1	26926	4	Mon	UL	UR	4	61.2261	81.4996	142.726			343		0.142045	61.2261	80.1875	141.414	0.134085	4
od	1	26926	5	Mon	UL	UR	24	42.5694	42.3367	84.9061			347		-0.00273981	42.5694	42.3367	84.9061	-0.00273981	5
od	1	26926	6	Tue	UL	UR	14	96.5183	21.4757	117.994			366		-0.635986	96.5183	21.4757	117.994	-0.635986	1
od	1	26926	7	Tue	UL	UR	18	65.3828	52.4342	117.817			370		-0.109904	65.3828	52.4342	117.817	-0.109904	2
od	1	26926	8	Tue	UL	UR	8	47.469	66.1568	113.626			374		0.164468	47.469	66.1568	113.626	0.164468	3
od	1	26926	9	Tue	UL	UR	28	42.7309	23.7346	66.4655			378		-0.285808	42.7309	23.7346	66.4655	-0.285808	4
od	1	26926	10	Tue	UL	UR	3	35.6913	15.4977	51.189			382		-0.39449	35.6913	15.4977	51.189	-0.39449	5
od	1	26926	11	Wed	UL	UR	23	28.1348	38.6682	66.803			401		0.157677	28.1348	38.6682	66.803	0.157677	1
od	1	26926	12	Wed	UL	UR	13	22.7653	21.3207	44.086			405		-0.0327688	22.7653	21.3207	44.086	-0.0327688	2
od	1	26926	13	Wed	UL	UR	10	41.1495	37.0879	78.2374			409		-0.0519131	41.1495	37.0879	78.2374	-0.0519131	3
od	1	26926	14	Wed	UL	UR	2	37.5454	35.495	73.0404			413		-0.0280721	37.5454	35.495	73.0404	-0.0280721	4
od	1	26926	15	Wed	UL	UR	22	30.7827	20.3529	51.1356			417		-0.203964	30.7827	20.3529	51.1356	-0.203964	5
od	1	26926	16	Thu	UL	UR	12	34.5299	26.5856	61.1155			436		-0.129988	34.5299	26.5856	61.1155	-0.129988	1
od	1	26926	17	Thu	UL	UR	27	19.2097	22.795	42.0047			440		0.0853556	19.2097	22.795	42.0047	0.0853556	2
od	1	26926	18	Thu	UL	UR	7	62.7642	14.1581	76.9223			444		-0.631885	62.7642	14.1581	76.9223	-0.631885	3
od	1	26926	19	Thu	UL	UR	17	17.8687	15.0033	32.8719			448		-0.0871676	17.8687	15.0033	32.8719	-0.0871676	4
od	1	26926	20	Thu	UL	UR	36	80.4537	52.7228	133.176			452		-0.208226	80.4537	52.7228	133.176	-0.208226	5
od	1	26926	21	Fri	UL	LR	18	88.5176	114.996	203.514			459		0.130107	33.0298	58.6559	91.6856	0.2795	1
or	2	26926	1	Mon	LR	LL	11	17.5588	49.4164	66.9752			478		0.475663	17.5588	49.4164	66.9752	0.475663	1
or	2	26926	2	Mon	LR	UR	16	82.1386	76.7868	158.925			482		-0.0336753	82.1386	76.7868	158.925	-0.0336753	2
or	2	26926	3	Mon	LR	UL	6	61.6979	71.8077	133.506			486		0.0757251	61.6979	71.8077	133.506	0.0757251	3
or	2	26926	4	Mon	LR	LL	26	39.3495	58.0412	97.3906			490		0.191925	39.3495	58.0412	97.3906	0.191925	4
or	2	26926	5	Mon	LR	UR	30	58.2012	64.2362	122.437			494		0.0492905	58.2012	64.2362	122.437	0.0492905	5
or	2	26926	6	Tue	LR	UR	4	50.733	49.608	100.341			513		-0.011212	50.733	49.608	100.341	-0.011212	1
or	2	26926	7	Tue	LR	UL	37	57.4804	81.4776	138.958			517		0.172694	57.4804	81.4776	138.958	0.172694	2
or	2	26926	8	Tue	LR	LL	14	74.4943	60.9002	135.395			521		-0.100404	74.4943	60.9002	135.395	-0.100404	3
or	2	26926	9	Tue	LR	LL	29	45.9084	47.2299	93.1382			525		0.0141886	45.9084	47.2299	93.1382	0.0141886	4
or	2	26926	10	Tue	LR	UR	9	59.9379	87.4907	147.429			529		0.186889	59.9379	87.4907	147.429	0.186889	5
or	2	26926	11	Wed	LR	LL	19	51.8906	33.6539	85.5445			548		-0.213185	51.8906	33.6539	85.5445	-0.213185	1
or	2	26926	12	Wed	LR	UR	3	24.0631	26.8366	50.8997			552		0.054489	24.0631	26.8366	50.8997	0.054489	2
or	2	26926	13	Wed	LR	UL	23	59.462	19.9639	79.4258			556		-0.497295	59.462	19.9639	79.4258	-0.497295	3
or	2	26926	14	Wed	LR	UR	13	34.3315	31.751	66.0825			560		-0.0390504	34.3315	31.751	66.0825	-0.0390504	4
or	2	26926	15	Wed	LR	LL	18	62.3882	75.2478	137.636			564		0.0934321	62.3882	75.2478	137.636	0.0934321	5
or	2	26926	16	Thu	LR	UR	8	85.1714	64.7568	149.928			583		-0.136162	85.1714	64.7568	149.928	-0.136162	1
or	2	26926	17	Thu	LR	LL	28	58.4628	70.5519	129.015			587		0.0937035	58.4628	70.5519	129.015	0.0937035	2
or	2	26926	18	Thu	LR	UR	7	77.1032	49.956	127.059			591		-0.213658	77.1032	49.956	127.059	-0.213658	3
or	2	26926	19	Thu	LR	LL	5	126.887	100.78	227.667			595		-0.11467	126.887	100.78	227.667	-0.11467	4
or	2	26926	20	Thu	LR	UL	15	39.535	67.5601	107.095			599		0.261685	39.535	67.5601	107.095	0.261685	5
or	2	26926	21	Fri	LR	UL	20	59.4412	81.4718	140.913			606		0.156342	19.3356	33.1184	52.454	0.262758	1
con	3	26926	1	Mon	LL	UR	21	61.7506	27.4927	89.2434			625		-0.38387	61.7506	27.4927	89.2434	-0.38387	1
con	3	26926	2	Mon	UL	UR	25	45.9523	51.3938	97.3461			629		0.055898	45.9523	51.3938	97.3461	0.055898	2
con	3	26926	3	Mon	LR	UR	31	145.523	80.0862	225.609			633		-0.290045	145.523	80.0862	225.609	-0.290045	3
con	3	26926	4	Mon	UR	UL	16	72.922	65.0202	137.942			637		-0.0572836	72.922	65.0202	137.942	-0.0572836	4
con	3	26926	5	Mon	LL	LR	11	48.4589	56.2796	104.738			641		0.0746683	48.4589	56.2796	104.738	0.0746683	5
con	3	26926	6	Tue	UL	LR	32	55.535	81.4461	136.981			660		0.189158	55.535	81.4461	136.981	0.189158	1
con	3	26926	7	Tue	UL	LL	2	19.7194	31.6108	51.3302			664		0.231663	19.7194	31.6108	51.3302	0.231663	2
con	3	26926	8	Tue	LL	LR	22	34.0836	41.5162	75.5999			668		0.098315	34.0836	41.5162	75.5999	0.098315	3
con	3	26926	9	Tue	UR	UL	33	62.1392	77.5984	139.738			672		0.11063	62.1392	77.5984	139.738	0.11063	4
con	3	26926	10	Tue	LR	LL	12	72.0602	53.9544	126.015			676		-0.143681	72.0602	53.9544	126.015	-0.143681	5
con	3	26926	11	Wed	LR	UR	5	105.981	70.8067	176.788			695		-0.198963	105.981	70.8067	176.788	-0.198963	1
con	3	26926	12	Wed	UL	LL	17	25.4816	45.3512	70.8328			699		0.280515	25.4816	45.3512	70.8328	0.280515	2
con	3	26926	13	Wed	LL	UR	34	15.4188	35.6409	51.0597			703		0.396049	15.4188	35.6409	51.0597	0.396049	3
con	3	26926	14	Wed	UR	UL	27	39.3838	21.7408	61.1246			707		-0.288639	39.3838	21.7408	61.1246	-0.288639	4
con	3	26926	15	Wed	LL	LR	24	23.2933	24.8202	48.1134			711		0.0317354	23.2933	24.8202	48.1134	0.0317354	5
con	3	26926	16	Thu	UL	UR	6	26.2076	37.6055	63.8131			730		0.178613	26.2076	37.6055	63.8131	0.178613	1
con	3	26926	17	Thu	LL	LR	15	27.8868	34.3593	62.2462			734		0.103982	27.8868	34.3593	62.2462	0.103982	2
con	3	26926	18	Thu	LR	UL	10	27.3832	26.8401	54.2233			738		-0.0100171	27.3832	26.8401	54.2233	-0.0100171	3
con	3	26926	19	Thu	LL	UR	26	22.1558	16.3411	38.4969			742		-0.151044	22.1558	16.3411	38.4969	-0.151044	4
con	3	26926	20	Thu	LR	UL	16	87.3394	76.2819	163.621			746		-0.0675796	87.3394	76.2819	163.621	-0.0675796	5
con	3	26926	21	Fri	UR	LL	29	48.5009	81.1632	129.664			753		0.251899	48.5009	81.1632	129.664	0.251899	1
or	1	26927	1	Mon	LL	UL	35	86.995	34.6159	121.611			313		-0.430711	86.995	34.6159	121.611	-0.430711	1
or	1	26927	2	Mon	LL	UR	9	105.115	66.7146	171.83			316		-0.22348	105.115	64.3314	169.446	-0.240688	2
or	1	26927	3	Mon	LL	LR	19	73.0308	46.9048	119.936			319		-0.217833	73.0308	46.7592	119.79	-0.219314	3
or	1	26927	4	Mon	LL	UL	4	26.7279	92.7296	119.458			322		0.552512	26.7279	92.7296	119.458	0.552512	4
or	1	26927	5	Mon	LL	UR	24	70.9053	18.0502	88.9555			325		-0.594175	70.9053	18.0502	88.9555	-0.594175	5
or	1	26927	6	Tue	LL	UR	14	63.9687	61.0414	125.01			348		-0.0234162	63.383	61.0414	124.424	-0.0188193	1
or	1	26927	7	Tue	LL	LR	18	72.1764	80.0676	152.244			351		0.0518322	71.2294	80.0676	151.297	0.0584161	2
or	1	26927	8	Tue	LL	UL	8	77.7125	81.1183	158.831			354		0.0214426	77.7125	81.1183	158.831	0.0214426	3
or	1	26927	9	Tue	LL	UR	28	127.777	38.5627	166.34			357		-0.536338	127.777	38.5627	166.34	-0.536338	4
or	1	26927	10	Tue	LL	UL	3	78.3942	35.7606	114.155			360		-0.373472	77.7846	35.381	113.166	-0.374704	5
or	1	26927	11	Wed	LL	LR	23	31.1986	21.8334	53.032			383		-0.176594	31.1986	21.8334	53.032	-0.176594	1
or	1	26927	12	Wed	LL	UL	13	49.6236	23.3008	72.9243			386		-0.360961	49.6236	23.3008	72.9243	-0.360961	2
or	1	26927	13	Wed	LL	UR	10	70.4788	41.5078	111.987			389		-0.258701	70.4788	41.5078	111.987	-0.258701	3
or	1	26927	14	Wed	LL	UL	2	25.8821	16.3268	42.2088			392		-0.226381	25.8821	16.3268	42.2088	-0.226381	4
or	1	26927	15	Wed	LL	UR	22	30.9337	49.9083	80.842			395		0.234713	30.9337	49.9083	80.842	0.234713	5
or	1	26927	16	Thu	LL	UL	12	36.3807	35.703	72.0837			418		-0.00940166	36.3807	35.703	72.0837	-0.00940166	1
or	1	26927	17	Thu	LL	UR	27	60.3417	5.7661	66.1078			421		-0.825555	60.3417	5.7661	66.1078	-0.825555	2
or	1	26927	18	Thu	LL	UR	7	43.7654	15.7537	59.5191			424		-0.470633	43.7654	15.7537	59.5191	-0.470633	3
or	1	26927	19	Thu	LL	UL	17	17.5351	19.916	37.4511			427		0.0635739	17.5351	19.916	37.4511	0.0635739	4
or	1	26927	20	Thu	LL	LR	36	50.5567	81.4397	131.996			430		0.233968	50.5567	81.4397	131.996	0.233968	5
or	1	26927	21	Fri	LL	LR	18	70.2485	109.285	179.534			453		0.217433	36.9245	52.1084	89.0328	0.170543	1
con	2	26927	1	Mon	UL	LL	11	23.697	19.3279	43.0248			460		-0.101548	23.697	19.3279	43.0248	-0.101548	1
con	2	26927	2	Mon	LL	UR	16	64.2688	77.9598	142.229			463		0.0962602	64.2688	77.9598	142.229	0.0962602	2
con	2	26927	3	Mon	UL	UR	6	22.6317	49.107	71.7387			466		0.369052	22.6317	49.107	71.7387	0.369052	3
con	2	26927	4	Mon	LR	UL	26	48.4485	51.8345	100.283			469		0.0337636	48.4485	51.8345	100.283	0.0337636	4
con	2	26927	5	Mon	UR	LL	30	44.8788	75.7425	120.621			472		0.255873	44.8788	75.7425	120.621	0.255873	5
con	2	26927	6	Tue	LL	LR	4	72.4741	99.3546	171.829			495		0.156438	72.4741	99.3546	171.829	0.156438	1
con	2	26927	7	Tue	UL	LR	37	76.5773	120.507	197.084			498		0.222899	76.5773	120.507	197.084	0.222899	2
con	2	26927	8	Tue	LR	UR	14	62.801	37.3956	100.197			501		-0.253556	62.801	37.3956	100.197	-0.253556	3
con	2	26927	9	Tue	UR	LL	29	15.3721	52.6324	68.0045			504		0.54791	15.3721	52.6324	68.0045	0.54791	4
con	2	26927	10	Tue	UL	LR	9	53.5532	26.0768	79.63			507		-0.345052	53.5532	26.0768	79.63	-0.345052	5
con	2	26927	11	Wed	UL	UR	19	40.1711	34.8265	74.9976			530		-0.0712632	40.1711	34.8265	74.9976	-0.0712632	1
con	2	26927	12	Wed	UL	LR	3	36.8184	44.0723	80.8908			533		0.089675	36.8184	44.0723	80.8908	0.089675	2
con	2	26927	13	Wed	LL	LR	23	41.1812	43.7786	84.9597			536		0.0305718	41.1812	43.7786	84.9597	0.0305718	3
con	2	26927	14	Wed	UR	LL	13	33.1258	71.0658	104.192			539		0.364136	33.1258	71.0658	104.192	0.364136	4
con	2	26927	15	Wed	UL	LR	18	61.0532	69.562	130.615			542		0.065144	61.0532	69.562	130.615	0.065144	5
con	2	26927	16	Thu	UL	LL	8	104.374	46.1036	150.478			565		-0.387238	104.374	46.1036	150.478	-0.387238	1
con	2	26927	17	Thu	LR	UR	28	60.2872	95.9668	156.254			568		0.228343	60.2872	95.9668	156.254	0.228343	2
con	2	26927	18	Thu	LL	LR	7	62.9598	49.4212	112.381			571		-0.120471	62.9598	49.4212	112.381	-0.120471	3
con	2	26927	19	Thu	UR	UL	5	92.2747	170.333	262.608			574		0.297243	92.2747	170.333	262.608	0.297243	4
con	2	26927	20	Thu	UL	LL	15	55.1198	40.9762	96.096			577		-0.147183	55.1198	40.9762	96.096	-0.147183	5
con	2	26927	21	Fri	LL	UR	20	120.676	135.458	256.135			601		0.0577131	82.7695	67.2689	150.038	-0.103311	1
od	3	26927	1	Mon	LR	LL	21	63.6001	47.6285	111.229			607		-0.143593	63.6001	47.6285	111.229	-0.143593	1
od	3	26927	2	Mon	LR	LL	25	74.4049	65.7181	140.123			610		-0.0619941	74.4049	65.7181	140.123	-0.0619941	2
od	3	26927	3	Mon	LR	LL	31	116.969	96.5261	213.495			613		-0.0957528	116.969	96.5261	213.495	-0.0957528	3
od	3	26927	4	Mon	LR	LL	16	105.326	54.4733	159.799			616		-0.318229	105.326	54.4733	159.799	-0.318229	4
od	3	26927	5	Mon	LR	LL	11	102.263	42.7122	144.975			619		-0.410764	102.263	42.7122	144.975	-0.410764	5
od	3	26927	6	Tue	LR	LL	32	109.071	61.4679	170.539			642		-0.279132	109.071	61.4679	170.539	-0.279132	1
od	3	26927	7	Tue	LR	LL	2	35.5162	43.9271	79.4433			645		0.105873	35.5162	43.9271	79.4433	0.105873	2
od	3	26927	8	Tue	LR	LL	22	55.2423	72.6101	127.852			648		0.135842	55.2423	72.6101	127.852	0.135842	3
od	3	26927	9	Tue	LR	LL	33	100.448	67.7416	168.19			651		-0.194462	100.448	67.7416	168.19	-0.194462	4
od	3	26927	10	Tue	LR	LL	12	92.2625	50.3468	142.609			654		-0.29392	92.2625	50.3468	142.609	-0.29392	5
od	3	26927	11	Wed	LR	LL	5	95.1595	90.8469	186.006			677		-0.0231853	95.1595	90.8469	186.006	-0.0231853	1
od	3	26927	12	Wed	LR	LL	17	58.148	52.6247	110.773			680		-0.0498622	58.148	52.6247	110.773	-0.0498622	2
od	3	26927	13	Wed	LR	LL	34	50.5621	34.2105	84.7727			683		-0.192888	50.5621	34.2105	84.7727	-0.192888	3
od	3	26927	14	Wed	LR	LL	27	31.143	15.3951	46.5381			686		-0.338385	31.143	15.3951	46.5381	-0.338385	4
od	3	26927	15	Wed	LR	LL	24	92.2219	34.2144	126.436			689		-0.458788	92.2219	34.2144	126.436	-0.458788	5
od	3	26927	16	Thu	LR	LL	6	60.3521	39.6874	100.04			712		-0.206565	60.3521	39.6874	100.04	-0.206565	1
od	3	26927	17	Thu	LR	LL	15	32.3959	32.0561	64.452			715		-0.00527132	32.3959	32.0561	64.452	-0.00527132	2
od	3	26927	18	Thu	LR	LL	10	88.2426	90.5668	178.809			718		0.012998	88.2426	90.5668	178.809	0.012998	3
od	3	26927	19	Thu	LR	LL	26	81.3581	54.6543	136.012			721		-0.196333	81.3581	54.6543	136.012	-0.196333	4
od	3	26927	20	Thu	LR	LL	16	159.064	111.313	270.377			724		-0.17661	159.064	111.313	270.377	-0.17661	5
od	3	26927	21	Fri	LR	UL	29	110.224	87.3594	197.583			747		-0.11572	110.224	87.3594	197.583	-0.11572	1
od	1	26929	1	Mon	UR	LL	35	69.4736	62.2469	131.72			314		-0.0548639	69.4736	62.2469	131.72	-0.0548639	1
od	1	26929	2	Mon	UR	LL	9	95.8928	62.3613	158.254			317		-0.211884	95.8928	61.8791	157.772	-0.215588	2
od	1	26929	3	Mon	UR	LL	19	37.7233	25.3013	63.0246			320		-0.197096	37.7233	25.3013	63.0246	-0.197096	3
od	1	26929	4	Mon	UR	LL	4	33.6736	70.4266	104.1			323		0.353055	33.6736	70.4266	104.1	0.353055	4
od	1	26929	5	Mon	UR	LL	24	35.5859	31.2662	66.8522			326		-0.0646158	35.5859	31.2662	66.8522	-0.0646158	5
od	1	26929	6	Tue	UR	LL	14	14.4055	96.9361	111.342			349		0.741239	14.4055	95.3839	109.789	0.73758	1
od	1	26929	7	Tue	UR	LL	18	39.4804	64.3596	103.84			352		0.239591	39.4804	64.0028	103.483	0.236969	2
od	1	26929	8	Tue	UR	LL	8	46.0271	58.8901	104.917			355		0.122602	45.5669	58.8901	104.457	0.127547	3
od	1	26929	9	Tue	UR	LL	28	42.2917	57.375	99.6666			358		0.151337	41.4804	57.375	98.8553	0.160786	4
od	1	26929	10	Tue	UR	LL	3	32.8741	83.6911	116.565			361		0.435953	31.0626	83.6911	114.754	0.458621	5
od	1	26929	11	Wed	UR	LL	23	30.9744	40.7214	71.6958			384		0.13595	30.9744	40.7214	71.6958	0.13595	1
od	1	26929	12	Wed	UR	LL	13	37.5395	29.7571	67.2966			387		-0.115644	37.5395	29.7571	67.2966	-0.115644	2
od	1	26929	13	Wed	UR	LL	10	32.7903	49.1525	81.9428			390		0.199678	32.7903	49.1525	81.9428	0.199678	3
od	1	26929	14	Wed	UR	LL	2	23.3964	29.0477	52.4441			393		0.107759	23.3964	29.0477	52.4441	0.107759	4
od	1	26929	15	Wed	UR	LL	22	28.207	30.4336	58.6407			396		0.0379707	28.207	30.4336	58.6407	0.0379707	5
od	1	26929	16	Thu	UR	LL	12	29.9597	53.3024	83.2621			419		0.280352	29.9597	53.3024	83.2621	0.280352	1
od	1	26929	17	Thu	UR	LL	27	26.002	29.6905	55.6926			422		0.0662301	26.002	29.6905	55.6926	0.0662301	2
od	1	26929	18	Thu	UR	LL	7	27.223	13.5724	40.7954			425		-0.33461	27.223	13.5724	40.7954	-0.33461	3
od	1	26929	19	Thu	UR	LL	17	33.175	27.8118	60.9869			428		-0.0879396	33.175	27.8118	60.9869	-0.0879396	4
od	1	26929	20	Thu	UR	LL	36	126.201	106.507	232.708			431		-0.084628	126.201	106.507	232.708	-0.084628	5
od	1	26929	21	Fri	UR	UL	18	48.7633	108.342	157.105			454		0.379228	15.0857	58.3182	73.4039	0.588967	1
or	2	26929	1	Mon	UL	LL	11	33.5616	28.1996	61.7612			461		-0.0868173	33.5616	28.1996	61.7612	-0.0868173	1
or	2	26929	2	Mon	UL	LR	16	92.4281	97.7058	190.134			464		0.0277576	92.4281	97.7058	190.134	0.0277576	2
or	2	26929	3	Mon	UL	UR	6	44.4864	88.3489	132.835			467		0.330203	44.4864	88.3489	132.835	0.330203	3
or	2	26929	4	Mon	UL	UR	26	17.7818	57.9714	75.7533			470		0.530533	17.7818	57.9714	75.7533	0.530533	4
or	2	26929	5	Mon	UL	LL	30	31.4743	79.7981	111.272			473		0.434283	31.4743	79.7981	111.272	0.434283	5
or	2	26929	6	Tue	UL	LL	4	97.3226	61.7818	159.104			496		-0.223381	97.3226	61.7818	159.104	-0.223381	1
or	2	26929	7	Tue	UL	UR	37	91.4829	89.1174	180.6			499		-0.0130981	91.4829	89.1174	180.6	-0.0130981	2
or	2	26929	8	Tue	UL	LR	14	54.8232	53.991	108.814			502		-0.00764767	54.8232	53.991	108.814	-0.00764767	3
or	2	26929	9	Tue	UL	LL	29	49.9383	32.8753	82.8136			505		-0.20604	49.9383	32.8753	82.8136	-0.20604	4
or	2	26929	10	Tue	UL	UR	9	65.505	27.4226	92.9276			508		-0.409808	65.505	27.4226	92.9276	-0.409808	5
or	2	26929	11	Wed	UL	LR	19	32.3703	34.1202	66.4905			531		0.0263173	32.3703	34.1202	66.4905	0.0263173	1
or	2	26929	12	Wed	UL	LL	3	16.3475	29.5408	45.8883			534		0.287511	16.3475	29.5408	45.8883	0.287511	2
or	2	26929	13	Wed	UL	UR	23	32.9904	32.2723	65.2628			537		-0.0110031	32.9904	32.2723	65.2628	-0.0110031	3
or	2	26929	14	Wed	UL	UR	13	32.161	37.867	70.028			540		0.0814815	32.161	37.867	70.028	0.0814815	4
or	2	26929	15	Wed	UL	LL	18	49.9423	63.1978	113.14			543		0.11716	49.9423	63.1978	113.14	0.11716	5
or	2	26929	16	Thu	UL	UR	8	43.3763	53.9439	97.3202			566		0.108585	43.3763	53.9439	97.3202	0.108585	1
or	2	26929	17	Thu	UL	LL	28	70.7372	66.1267	136.864			569		-0.0336862	70.7372	66.1267	136.864	-0.0336862	2
or	2	26929	18	Thu	UL	UR	7	20.3167	45.7889	66.1057			572		0.385326	20.3167	45.7889	66.1057	0.385326	3
or	2	26929	19	Thu	UL	LL	5	134.556	108.528	243.085			575		-0.107073	134.556	108.528	243.085	-0.107073	4
or	2	26929	20	Thu	UL	LR	15	40.342	41.5645	81.9065			578		0.0149267	40.342	41.5645	81.9065	0.0149267	5
or	2	26929	21	Fri	UL	LR	20	97.6552	112.816	210.471			602		0.0720308	43.9327	63.7124	107.645	0.18375	1
con	3	26929	1	Mon	UL	LR	21	35.9995	25.4633	61.4628			608		-0.171425	35.9995	25.4633	61.4628	-0.171425	1
con	3	26929	2	Mon	UL	LL	25	70.1927	82.186	152.379			611		0.0787073	70.1927	82.186	152.379	0.0787073	2
con	3	26929	3	Mon	LL	LR	31	178.989	63.0724	242.062			614		-0.478874	178.989	63.0724	242.062	-0.478874	3
con	3	26929	4	Mon	UR	LR	16	46.1343	69.5398	115.674			617		0.20234	46.1343	69.5398	115.674	0.20234	4
con	3	26929	5	Mon	UL	LL	11	42.3294	87.5072	129.837			620		0.347959	42.3294	87.5072	129.837	0.347959	5
con	3	26929	6	Tue	LL	UR	32	114.233	43.533	157.766			643		-0.448132	114.233	43.533	157.766	-0.448132	1
con	3	26929	7	Tue	UL	UR	2	37.9902	50.1531	88.1432			646		0.13799	37.9902	50.1531	88.1432	0.13799	2
con	3	26929	8	Tue	LR	UR	22	43.2879	27.7617	71.0496			649		-0.218525	43.2879	27.7617	71.0496	-0.218525	3
con	3	26929	9	Tue	UL	LL	33	51.4746	95.4071	146.882			652		0.299101	51.4746	95.4071	146.882	0.299101	4
con	3	26929	10	Tue	LL	LR	12	82.026	57.9671	139.993			655		-0.171858	82.026	57.9671	139.993	-0.171858	5
con	3	26929	11	Wed	LL	LR	5	78.0971	96.2218	174.319			678		0.103975	78.0971	96.2218	174.319	0.103975	1
con	3	26929	12	Wed	UL	LL	17	26.4425	68.8025	95.245			681		0.444748	26.4425	68.8025	95.245	0.444748	2
con	3	26929	13	Wed	LR	UR	34	23.7144	49.4962	73.2107			684		0.35216	23.7144	49.4962	73.2107	0.35216	3
con	3	26929	14	Wed	UR	LR	27	43.2791	44.0893	87.3683			687		0.00927354	43.2791	44.0893	87.3683	0.00927354	4
con	3	26929	15	Wed	UL	LL	24	46.066	40.4915	86.5575			690		-0.0644028	46.066	40.4915	86.5575	-0.0644028	5
con	3	26929	16	Thu	LL	UR	6	74.6654	32.3313	106.997			713		-0.395658	74.6654	32.3313	106.997	-0.395658	1
con	3	26929	17	Thu	UL	UR	15	34.542	21.4833	56.0253			716		-0.233085	34.542	21.4833	56.0253	-0.233085	2
con	3	26929	18	Thu	LL	LR	10	57.0903	50.7486	107.839			719		-0.0588075	57.0903	50.7486	107.839	-0.0588075	3
con	3	26929	19	Thu	UL	UR	26	61.196	33.7246	94.9206			722		-0.289414	61.196	33.7246	94.9206	-0.289414	4
con	3	26929	20	Thu	UL	LR	16	87.0998	75.671	162.771			725		-0.070214	87.0998	75.671	162.771	-0.070214	5
con	3	26929	21	Fri	LL	UR	29	134.851	51.3074	186.159			748		-0.448778	134.851	51.3074	186.159	-0.448778	1
od	1	26930	1	Mon	UL	LR	35	58.814	65.8225	124.636			315		0.0562311	58.814	65.8225	124.636	0.0562311	1
od	1	26930	2	Mon	UL	LR	9	63.5301	85.0379	148.568			318		0.144767	63.5301	83.8564	147.386	0.137912	2
od	1	26930	3	Mon	UL	LR	19	36.9673	36.7296	73.697			321		-0.00322506	36.9673	36.7296	73.697	-0.00322506	3
od	1	26930	4	Mon	UL	LR	4	70.1528	89.6022	159.755			324		0.121745	70.1528	89.6022	159.755	0.121745	4
od	1	26930	5	Mon	UL	LR	24	26.1115	41.0785	67.19			327		0.222757	26.1115	41.0785	67.19	0.222757	5
od	1	26930	6	Tue	UL	LR	14	87.7242	40.9194	128.644			350		-0.363833	87.7242	40.9194	128.644	-0.363833	1
od	1	26930	7	Tue	UL	LR	18	29.2827	65.1654	94.4482			353		0.37992	29.2827	65.1654	94.4482	0.37992	2
od	1	26930	8	Tue	UL	LR	8	74.3953	37.3068	111.702			356		-0.332031	74.3953	36.1354	110.531	-0.346147	3
od	1	26930	9	Tue	UL	LR	28	63.2358	54.1046	117.34			359		-0.0778183	63.2358	54.1046	117.34	-0.0778183	4
od	1	26930	10	Tue	UL	LR	3	39.4403	31.2634	70.7037			362		-0.115651	39.4403	31.2634	70.7037	-0.115651	5
od	1	26930	11	Wed	UL	LR	23	22.6369	41.0423	63.6792			385		0.289033	22.6369	41.0423	63.6792	0.289033	1
od	1	26930	12	Wed	UL	LR	13	33.8173	37.2362	71.0535			388		0.0481159	33.8173	37.2362	71.0535	0.0481159	2
od	1	26930	13	Wed	UL	LR	10	45.5395	42.0614	87.6009			391		-0.0397038	45.5395	42.0614	87.6009	-0.0397038	3
od	1	26930	14	Wed	UL	LR	2	55.701	35.0237	90.7247			394		-0.227912	55.701	35.0237	90.7247	-0.227912	4
od	1	26930	15	Wed	UL	LR	22	51.775	34.0461	85.8211			397		-0.206579	51.775	34.0461	85.8211	-0.206579	5
od	1	26930	16	Thu	UL	LR	12	59.6852	48.7247	108.41			420		-0.101102	59.6852	48.7247	108.41	-0.101102	1
od	1	26930	17	Thu	UL	LR	27	25.6664	41.541	67.2073			423		0.236203	25.6664	41.541	67.2073	0.236203	2
od	1	26930	18	Thu	UL	LR	7	21.5587	22.602	44.1607			426		0.0236248	21.5587	22.602	44.1607	0.0236248	3
od	1	26930	19	Thu	UL	LR	17	13.3989	15.1607	28.5596			429		0.0616865	13.3989	15.1607	28.5596	0.0616865	4
od	1	26930	20	Thu	UL	LR	36	69.1744	100.493	169.668			432		0.18459	69.1744	100.493	169.668	0.18459	5
od	1	26930	21	Fri	UL	UR	18	65.2823	75.9691	141.251			455		0.075658	31.9535	36.9146	68.8681	0.0720379	1
con	2	26930	1	Mon	UL	LL	11	46.0139	69.0759	115.09			462		0.200383	46.0139	69.0759	115.09	0.200383	1
con	2	26930	2	Mon	LL	UR	16	84.7549	113.393	198.148			465		0.144529	84.7549	113.393	198.148	0.144529	2
con	2	26930	3	Mon	UL	UR	6	50.6257	78.1932	128.819			468		0.214002	50.6257	78.1932	128.819	0.214002	3
con	2	26930	4	Mon	UR	UL	26	43.6237	31.5643	75.188			471		-0.16039	43.6237	31.5643	75.188	-0.16039	4
con	2	26930	5	Mon	LR	LL	30	31.3547	63.6457	95.0004			474		0.339905	31.3547	63.6457	95.0004	0.339905	5
con	2	26930	6	Tue	LL	LR	4	127.1	63.0096	190.11			497		-0.337124	127.1	63.0096	190.11	-0.337124	1
con	2	26930	7	Tue	UL	LR	37	125.627	90.0467	215.674			500		-0.164974	125.627	90.0467	215.674	-0.164974	2
con	2	26930	8	Tue	LR	UR	14	68.9344	47.4907	116.425			503		-0.184185	68.9344	47.4907	116.425	-0.184185	3
con	2	26930	9	Tue	LL	UL	29	50.2585	29.7678	80.0263			506		-0.25605	50.2585	29.7678	80.0263	-0.25605	4
con	2	26930	10	Tue	LR	UR	9	58.407	35.7844	94.1913			509		-0.240177	58.407	35.7844	94.1913	-0.240177	5
con	2	26930	11	Wed	LR	UR	19	38.6508	53.411	92.0619			532		0.160329	38.6508	53.411	92.0619	0.160329	1
con	2	26930	12	Wed	UL	LL	3	27.2961	39.3952	66.6914			535		0.18142	27.2961	39.3952	66.6914	0.18142	2
con	2	26930	13	Wed	UL	LR	23	30.4929	38.317	68.81			538		0.113705	30.4929	38.317	68.81	0.113705	3
con	2	26930	14	Wed	UR	LR	18	64.3389	51.0324	115.371			541		-0.115337	64.3389	51.0324	115.371	-0.115337	4
con	2	26930	15	Wed	LR	UL	8	75.6821	58.3035	133.986			544		-0.129705	75.6821	58.3035	133.986	-0.129705	5
con	2	26930	16	Thu	UL	UR	28	110.599	88.3617	198.961			567		-0.111768	110.599	88.3617	198.961	-0.111768	1
con	2	26930	17	Thu	LL	LR	7	98.9111	51.64	150.551			570		-0.313987	98.9111	51.64	150.551	-0.313987	2
con	2	26930	18	Thu	LL	UL	5	31.2647	53.5326	84.7973			573		0.262601	31.2647	53.5326	84.7973	0.262601	3
con	2	26930	19	Thu	UR	LR	15	127.928	97.3487	225.276			576		-0.13574	127.928	97.3487	225.276	-0.13574	4
con	2	26930	20	Thu	LL	UR	20	57.6096	59.5849	117.195			579		0.0168552	57.6096	59.5849	117.195	0.0168552	5
con	2	26930	21	Fri	UL	LR	20	56.7135	101.611	158.325			600		0.28358	30.1092	28.3009	58.4101	-0.0309586	1
or	3	26930	1	Mon	LR	UR	21	65.5108	48.3952	113.906			609		-0.150261	65.5108	48.3952	113.906	-0.150261	1
or	3	26930	2	Mon	LR	UL	25	76.0151	59.9418	135.957			612		-0.118223	76.0151	59.9418	135.957	-0.118223	2
or	3	26930	3	Mon	LR	LL	31	115.763	131.828	247.591			615		0.0648839	115.763	131.828	247.591	0.0648839	3
or	3	26930	4	Mon	LR	UR	16	101.309	52.8314	154.14			618		-0.314503	101.309	52.8314	154.14	-0.314503	4
or	3	26930	5	Mon	LR	UL	11	53.7727	55.141	108.914			621		0.0125626	53.7727	55.141	108.914	0.0125626	5
or	3	26930	6	Tue	LR	LL	32	97.4768	101.589	199.066			644		0.0206596	97.4768	101.589	199.066	0.0206596	1
or	3	26930	7	Tue	LR	UL	2	66.9467	22.8125	89.7591			647		-0.491696	66.9467	22.8125	89.7591	-0.491696	2
or	3	26930	8	Tue	LR	UR	22	69.0607	64.0768	133.137			650		-0.0374338	69.0607	64.0768	133.137	-0.0374338	3
or	3	26930	9	Tue	LR	UL	33	96.3539	112.354	208.708			653		0.0766619	96.3539	112.354	208.708	0.0766619	4
or	3	26930	10	Tue	LR	UR	12	46.6123	11.6485	58.2608			656		-0.600127	46.6123	11.6485	58.2608	-0.600127	5
or	3	26930	11	Wed	LR	UL	5	128.183	89.8707	218.053			679		-0.1757	128.183	89.8707	218.053	-0.1757	1
or	3	26930	12	Wed	LR	LL	17	35.1263	54.9951	90.1214			682		0.220467	35.1263	54.9951	90.1214	0.220467	2
or	3	26930	13	Wed	LR	UR	34	32.0116	50.0382	82.0497			685		0.219703	32.0116	50.0382	82.0497	0.219703	3
or	3	26930	14	Wed	LR	UR	27	43.6617	21.307	64.9686			688		-0.344085	43.6617	21.307	64.9686	-0.344085	4
or	3	26930	15	Wed	LR	UL	24	31.3035	60.5245	91.828			691		0.318214	31.3035	60.5245	91.828	0.318214	5
or	3	26930	16	Thu	LR	UL	6	49.7191	47.9563	97.6754			714		-0.0180468	49.7191	47.9563	97.6754	-0.0180468	1
or	3	26930	17	Thu	LR	UR	15	44.6183	68.7333	113.352			717		0.212745	44.6183	68.7333	113.352	0.212745	2
or	3	26930	18	Thu	LR	UL	10	48.3746	79.0305	127.405			720		0.240618	48.3746	79.0305	127.405	0.240618	3
or	3	26930	19	Thu	LR	UR	26	36.4374	54.2757	90.7131			723		0.196645	36.4374	54.2757	90.7131	0.196645	4
or	3	26930	20	Thu	LR	LL	16	69.5706	84.2815	153.852			726		0.0956175	69.5706	84.2815	153.852	0.0956175	5
or	3	26930	21	Fri	LR	LL	29	71.6009	74.8173	146.418			749		0.0219673	71.6009	74.8173	146.418	0.0219673	1
