# Supplementary material for: The object space task shows cumulative memory expression in both mice and rats
Source: PLoS Biol. 2019 Jun 17;17(6):e3000322. doi: 10.1371/journal.pbio.3000322 (PMC6597117; doi:10.1371/journal.pbio.3000322)
Supplement: S4 Data — (XLSX) [file pbio.3000322.s007.xlsx]

## Sheet: Sheet1
condition	goal	group	session	box	subject	trial	day	loc_1	loc_2	obj	loc_1_time	loc_2_time	loc_1_time_5	loc_2_time_5	comments	run_nr	sequence	total_10	DI_10	total_5	DI_5
or	UR	1	1	1	1	1	Mon	UR	LL	13	17.0968	20.0061	16.7967	20.0061		1	1	37.103	0.078411	36.8028	0.0872058
or	UL	1	1	1	2	1	Mon	UL	LL	13	20.0055	15.1025	20.0055	14.6019		2	2	35.108	-0.139655	34.6074	-0.156141
or	LR	1	1	1	3	1	Mon	LR	LL	13	20.4993	26.195	20.4993	26.195		3	3	46.6942	0.121979	46.6942	0.121979
or	LL	1	1	1	4	1	Mon	LL	LR	13	14.6013	15.7977	14.6013	15.7977		4	4	30.399	0.039358	30.399	0.039358
or	UR	1	1	1	1	2	Mon	UR	UL	14	32.5925	43.8997	32.5925	43.8997		5	5	76.4922	0.147822	76.4922	0.147822
or	UL	1	1	1	2	2	Mon	UL	LR	14	55.685	28.8006	55.0988	28.8006		6	6	84.4856	-0.318212	83.8994	-0.313448
or	LR	1	1	1	3	2	Mon	LR	UR	14	29.5006	34.9955	29.5006	34.9955		7	7	64.4962	0.0851969	64.4962	0.0851969
or	LL	1	1	1	4	2	Mon	LL	UL	14	21.8975	26.5956	21.8975	26.5956		8	8	48.4931	0.0968825	48.4931	0.0968825
or	UR	1	1	1	1	3	Mon	UR	LR	23	43.7948	35.595	43.7948	34.8949		9	9	79.3899	-0.103285	78.6897	-0.113102
or	UL	1	1	1	2	3	Mon	UL	LL	23	32.3966	36.2958	32.3966	36.2958		10	10	68.6925	0.0567637	68.6925	0.0567637
or	LR	1	1	1	3	3	Mon	LR	UL	23	25.4006	33.3012	25.4006	33.3012		11	11	58.7018	0.134589	58.7018	0.134589
or	LL	1	1	1	4	3	Mon	LL	UR	23	18.6012	24.5963	18.6012	24.5963		12	12	43.1975	0.138785	43.1975	0.138785
or	UR	1	1	1	1	4	Mon	UR	UL	40	27.5949	40.0012	26.709	40.0012		13	13	67.5961	0.183535	66.7102	0.199253
or	UL	1	1	1	2	4	Mon	UL	UR	40	59.2015	32.2964	59.2015	32.2964		14	14	91.498	-0.294051	91.498	-0.294051
or	LR	1	1	1	3	4	Mon	LR	LL	40	22.4004	37.7113	22.4004	37.7113		15	15	60.1118	0.254707	60.1118	0.254707
or	LL	1	1	1	4	4	Mon	LL	UL	40	12.5968	22.2944	12.5968	22.2944		16	16	34.8912	0.277939	34.8912	0.277939
or	UR	1	1	1	1	5	Mon	UR	LR	11	31.0078	94.5179	31.0078	94.1382		17	17	125.526	0.505953	125.146	0.504453
or	UL	1	1	1	2	5	Mon	UL	LR	11	62.642	39.1426	62.0497	39.1426		18	18	101.785	-0.230875	101.192	-0.226372
or	LR	1	1	1	3	5	Mon	LR	UR	11	24.3226	26.096	24.3226	26.096		19	19	50.4186	0.0351736	50.4186	0.0351736
or	LL	1	1	1	4	5	Mon	LL	UR	11	10.8003	40.9955	10.8003	40.9955		20	20	51.7958	0.582967	51.7958	0.582967
or	UR	1	1	1	1	6	Tue	UR	UL	50	36.7077	33.3066	36.7077	33.3066		21	21	70.0143	-0.0485771	70.0143	-0.0485771
or	UL	1	1	1	2	6	Tue	UL	LR	50	74.6004	49.3167	74.6004	49.3167		22	22	123.917	-0.204037	123.917	-0.204037
or	LR	1	1	1	3	6	Tue	LR	UR	50	41.8599	58.7629	41.8599	58.7629		23	23	100.623	0.167984	100.623	0.167984
or	LL	1	1	1	4	6	Tue	LL	UL	50	41.7595	35.9932	41.7595	35.9932		24	24	77.7527	-0.0741621	77.7527	-0.0741621
or	UR	1	1	1	1	7	Tue	UR	LR	2	17.8909	63.8998	17.8909	63.8998		25	25	81.7907	0.562519	81.7907	0.562519
or	UL	1	1	1	2	7	Tue	UL	LL	2	38.0522	23.3027	38.0522	23.3027		26	26	61.3549	-0.240397	61.3549	-0.240397
or	LR	1	1	1	3	7	Tue	LR	LL	2	17.5989	39.9987	17.5989	39.9987		27	27	57.5976	0.388901	57.5976	0.388901
or	LL	1	1	1	4	7	Tue	LL	LR	2	8.99624	7.10055	8.99624	7.10055		28	28	16.0968	-0.117768	16.0968	-0.117768
or	UR	1	1	1	1	8	Tue	UR	LR	15	50.0959	58.1018	49.7103	58.1018		29	29	108.198	0.0739932	107.812	0.0778337
or	UL	1	1	1	2	8	Tue	UL	UR	15	70.0087	65.6001	70.0087	65.6001		30	30	135.609	-0.0325096	135.609	-0.0325096
or	LR	1	1	1	3	8	Tue	LR	LL	15	50.302	37.1997	50.302	37.1997		31	31	87.5017	-0.149738	87.5017	-0.149738
or	LL	1	1	1	4	8	Tue	LL	UR	15	44.3971	27.2969	43.5038	27.2969		32	32	71.694	-0.238517	70.8006	-0.228909
or	UR	1	1	1	1	9	Tue	UR	LL	24	36.084	22.4961	35.4105	22.4961		33	33	58.5801	-0.231953	57.9066	-0.22302
or	UL	1	1	1	2	9	Tue	UL	LL	24	28.072	27.1037	28.072	27.1037		34	34	55.1757	-0.0175501	55.1757	-0.0175501
or	LR	1	1	1	3	9	Tue	LR	UL	24	25.5553	20.2498	25.5553	20.2498		35	35	45.8052	-0.115828	45.8052	-0.115828
or	LL	1	1	1	4	9	Tue	LL	UR	24	20.6131	16.8322	20.6131	16.2001		36	36	37.4453	-0.100972	36.8132	-0.119876
or	UR	1	1	1	1	10	Tue	UR	UL	41	90.1764	113.653	90.1764	113.653		37	37	203.83	0.115179	203.83	0.115179
or	UL	1	1	1	2	10	Tue	UL	LR	41	101.869	77.5839	101.869	77.5839		38	38	179.452	-0.135327	179.452	-0.135327
or	LR	1	1	1	3	10	Tue	LR	UR	41	85.219	98.262	85.219	97.5993		39	39	183.481	0.0710867	182.818	0.0677191
or	LL	1	1	1	4	10	Tue	LL	UL	41	104.84	67.3177	104.71	67.3177		40	40	172.157	-0.217951	172.028	-0.217363
or	UR	1	1	1	1	11	Wed	UR	LR	12	63.0902	40.4971	63.0902	40.4971		41	41	103.587	-0.218107	103.587	-0.218107
or	UL	1	1	1	2	11	Wed	UL	LR	12	58.6037	28.804	58.5114	28.804		42	42	87.4077	-0.340927	87.3155	-0.340231
or	LR	1	1	1	3	11	Wed	LR	UL	12	42.5003	40.1958	42.5003	40.1958		43	43	82.6961	-0.0278672	82.6961	-0.0278672
or	LL	1	1	1	4	11	Wed	LL	UL	12	17.3667	22.4998	17.3667	22.4998		44	44	39.8664	0.128757	39.8664	0.128757
or	UR	1	1	1	1	12	Wed	UR	UL	51	50.308	67.9414	50.308	67.9414		45	45	118.249	0.149121	118.249	0.149121
or	UL	1	1	1	2	12	Wed	UL	UR	51	118.161	38.8746	118.161	38.8746		46	46	157.036	-0.504895	157.036	-0.504895
or	LR	1	1	1	3	12	Wed	LR	LL	51	78.6593	67.492	78.6593	67.492		47	47	146.151	-0.0764095	146.151	-0.0764095
or	LL	1	1	1	4	12	Wed	LL	UR	51	89.3629	39.4116	88.8668	39.4116		48	48	128.774	-0.387897	128.278	-0.38553
or	UR	1	1	1	1	13	Wed	UR	LL	3	77.9959	124.879	77.9959	124.836		49	49	202.875	0.231093	202.831	0.230929
or	UL	1	1	1	2	13	Wed	UL	LL	3	93.3198	90.5232	93.3198	90.2995		50	50	183.843	-0.0152118	183.619	-0.0164484
or	LR	1	1	1	3	13	Wed	LR	UR	3	76.4898	125.587	76.4898	125.1		51	51	202.077	0.242964	201.589	0.241133
or	LL	1	1	1	4	13	Wed	LL	UL	3	99.8915	37.599	99.8915	37.599		52	52	137.491	-0.453067	137.491	-0.453067
or	UR	1	1	1	1	14	Wed	UR	LR	16	62.1994	109.371	62.1994	108.183		53	53	171.57	0.274938	170.383	0.269885
or	UL	1	1	1	2	14	Wed	UL	LL	16	73.5006	81.0919	73.5006	81.0919		54	54	154.593	0.0491055	154.593	0.0491055
or	LR	1	1	1	3	14	Wed	LR	LL	16	65.3021	88.7909	65.3021	88.7909		55	55	154.093	0.152432	154.093	0.152432
or	LL	1	1	1	4	14	Wed	LL	LR	16	60.4592	57.0606	60.4592	57.0606		56	56	117.52	-0.0289188	117.52	-0.0289188
or	UR	1	1	1	1	15	Wed	UR	UL	25	67.5805	64.5216	67.5805	64.5216		57	57	132.102	-0.0231551	132.102	-0.0231551
or	UL	1	1	1	2	15	Wed	UL	LR	25	53.8062	40.1405	53.8062	40.1405		58	58	93.9467	-0.145462	93.9467	-0.145462
or	LR	1	1	1	3	15	Wed	LR	UR	25	56.3385	35.7281	56.3385	35.7281		59	59	92.0666	-0.223864	92.0666	-0.223864
or	LL	1	1	1	4	15	Wed	LL	UR	25	25.7323	71.4425	25.7323	71.4425		60	60	97.1748	0.470392	97.1748	0.470392
or	UR	1	1	1	1	16	Thu	UR	UL	42	42.9225	47.9716	42.9225	47.9716		61	61	90.8941	0.0555492	90.8941	0.0555492
or	UL	1	1	1	2	16	Thu	UL	LL	42	63.0804	44.5381	63.0804	44.133		62	62	107.618	-0.172296	107.213	-0.176726
or	LR	1	1	1	3	16	Thu	LR	LL	42	45.6828	89.9274	45.6828	89.9274		63	63	135.61	0.326263	135.61	0.326263
or	LL	1	1	1	4	16	Thu	LL	UR	42	55.5285	34.7314	55.5285	34.7314		64	64	90.2599	-0.230413	90.2599	-0.230413
or	UR	1	1	1	1	17	Thu	UR	LR	33	41.3077	84.5855	41.3077	84.2255		65	65	125.893	0.343767	125.533	0.341884
or	UL	1	1	1	2	17	Thu	UL	LR	33	90.5276	46.8672	90.5276	46.8672		66	66	137.395	-0.317773	137.395	-0.317773
or	LR	1	1	1	3	17	Thu	LR	UR	33	52.3428	81.7771	52.3428	81.3752		67	67	134.12	0.219462	133.718	0.217116
or	LL	1	1	1	4	17	Thu	LL	LR	33	38.6876	65.7794	38.6876	65.7794		68	68	104.467	0.259334	104.467	0.259334
or	UR	1	1	1	1	18	Thu	UR	LL	52	46.9631	48.4036	46.9631	48.4036		69	69	95.3667	0.015105	95.3667	0.015105
or	UL	1	1	1	2	18	Thu	UL	LL	52	75.1366	66.7612	75.1366	66.7612		70	70	141.898	-0.0590242	141.898	-0.0590242
or	LR	1	1	1	3	18	Thu	LR	LL	52	45.3845	90.5655	45.3845	90.5655		71	71	135.95	0.332335	135.95	0.332335
or	LL	1	1	1	4	18	Thu	LL	UL	52	87.8283	43.4717	87.8283	43.4717		72	72	131.3	-0.337827	131.3	-0.337827
or	UR	1	1	1	1	19	Thu	UR	UL	4	20.6028	0	20.6028	0		73	73	20.6028	-1	20.6028	-1
or	UL	1	1	1	2	19	Thu	UL	UR	4	132.276	76.7125	132.054	76.7125		74	74	208.988	-0.265867	208.766	-0.265087
or	LR	1	1	1	3	19	Thu	LR	UL	4	93.6726	137.107	93.5372	137.107		75	75	230.78	0.188209	230.645	0.188906
or	LL	1	1	1	4	19	Thu	LL	UL	4	80.519	105.004	80.2961	105.004		76	76	185.523	0.131979	185.3	0.133341
or	UR	1	1	1	1	20	Thu	UR	LR	17	17.4617	41.0263	17.4617	41.0263		77	77	58.488	0.402897	58.488	0.402897
or	UL	1	1	1	2	20	Thu	UL	LR	17	33.0014	25.9003	33.0014	25.9003		78	78	58.9017	-0.120559	58.9017	-0.120559
or	LR	1	1	1	3	20	Thu	LR	UR	17	33.669	25.3764	33.4305	25.3764		79	79	59.0454	-0.140444	58.8069	-0.136958
or	LL	1	1	1	4	20	Thu	LL	UR	17	26.267	16.1129	26.267	16.1129		80	80	42.3799	-0.239597	42.3799	-0.239597
or	UR	1	1	1	1	21	Fri	UR	LR	26	12.8649	31.3854	12.8649	31.3417		81	81	44.2503	0.418539	44.2066	0.417964
or	UL	1	1	1	2	21	Fri	UL	LR	26	27.3507	39.1284	27.3507	39.1284		82	82	66.4791	0.177164	66.4791	0.177164
or	LR	1	1	1	3	21	Fri	LR	LL	26	43.3903	28.5853	43.3903	28.2852		83	83	71.9755	-0.205694	71.6754	-0.210743
or	LL	1	1	1	4	21	Fri	LL	UL	26	18.3521	15.923	18.3521	15.923		84	84	34.2751	-0.0708692	34.2751	-0.0708692
or	UR	1	1	1	1	22	Fri	UR	UL	43	28.7974	61.1912	28.7974	61.1912		85	85	89.9886	0.359977	89.9886	0.359977
or	UL	1	1	1	2	22	Fri	UL	LL	43	60.0883	74.1235	59.685	74.1235		86	86	134.212	0.104575	133.808	0.107904
or	LR	1	1	1	3	22	Fri	LR	UR	43	48.1168	81.2853	48.1168	81.2853		87	87	129.402	0.256321	129.402	0.256321
or	LL	1	1	1	4	22	Fri	LL	UR	43	51.2052	21.3319	51.2052	21.3319		88	88	72.5371	-0.411835	72.5371	-0.411835
or	UR	1	1	1	1	23	Fri	UR	UL	34	16.9133	55.6634	16.9133	55.6634		89	89	72.5767	0.533918	72.5767	0.533918
or	UL	1	1	1	2	23	Fri	UL	LL	34	80.5259	46.6186	80.5259	46.6186		90	90	127.144	-0.266683	127.144	-0.266683
or	LR	1	1	1	3	23	Fri	LR	UR	34	40.6015	51.2755	40.6015	51.2755		91	91	91.877	0.116176	91.877	0.116176
or	LL	1	1	1	4	23	Fri	LL	UL	34	29.5989	57.5763	29.5989	57.5763		92	92	87.1752	0.320933	87.1752	0.320933
or	UR	1	1	1	1	24	Fri	UR	LR	53	36.1711	94.7876	36.1711	94.7876		93	93	130.959	0.447595	130.959	0.447595
or	UL	1	1	1	2	24	Fri	UL	LR	53	88.5122	48.7478	88.5122	48.7478		94	94	137.26	-0.289701	137.26	-0.289701
or	LR	1	1	1	3	24	Fri	LR	LL	53	22.4985	64.3675	22.4985	64.3675		95	95	86.8661	0.481995	86.8661	0.481995
or	LL	1	1	1	4	24	Fri	LL	UR	53	35.6231	53.0113	35.6231	52.6959		96	96	88.6344	0.19618	88.3189	0.193309
or	UR	1	1	1	1	25	Fri	UR	LL	5	25.4231	76.4639	25.4231	76.4639		97	97	101.887	0.500955	101.887	0.500955
or	UL	1	1	1	2	25	Fri	UL	UR	5	107.339	31.1812	107.339	31.1812		98	98	138.52	-0.549796	138.52	-0.549796
or	LR	1	1	1	3	25	Fri	LR	UL	5	66.48	43.7281	66.48	43.7281		99	99	110.208	-0.206445	110.208	-0.206445
or	LL	1	1	1	4	25	Fri	LL	LR	5	31.855	101.895	31.855	101.895		100	100	133.75	0.523664	133.75	0.523664
or	UR	1	2	1	1	26	Mon	UR	LL	18	21.9541	66.6796	21.9541	66.6796		101	101	88.6337	0.50461	88.6337	0.50461
or	UL	1	2	1	2	26	Mon	UL	UR	18	44.5618	78.6797	44.5618	78.0797		102	102	123.242	0.276838	122.642	0.2733
or	LR	1	2	1	3	26	Mon	LR	UL	18	53.5264	78.718	53.3946	78.718		103	103	132.244	0.190493	132.113	0.191681
or	LL	1	2	1	4	26	Mon	LL	LR	18	36.876	45.176	36.876	45.176		104	104	82.0521	0.101155	82.0521	0.101155
or	UR	1	2	1	1	27	Mon	UR	LR	27	23.5847	48.8457	23.5847	48.8457		105	105	72.4303	0.348763	72.4303	0.348763
or	UL	1	2	1	2	27	Mon	UL	LL	27	47.3926	53.9025	47.3926	53.9025		106	106	101.295	0.0642672	101.295	0.0642672
or	LR	1	2	1	3	27	Mon	LR	LL	27	17.7869	63.167	17.3839	63.167		107	107	80.9539	0.560568	80.5509	0.568375
or	LL	1	2	1	4	27	Mon	LL	UL	27	26.6308	30.8731	26.6308	30.8731		108	108	57.5039	0.0737728	57.5039	0.0737728
or	UR	1	2	1	1	28	Mon	UR	UL	44	16.7288	35.5449	16.7288	35.5449		109	109	52.2737	0.359953	52.2737	0.359953
or	UL	1	2	1	2	28	Mon	UL	LR	44	58.7477	54.2916	58.7477	54.2916		110	110	113.039	-0.0394211	113.039	-0.0394211
or	LR	1	2	1	3	28	Mon	LR	UR	44	56.3564	48.5672	55.9566	48.5672		111	111	104.924	-0.0742369	104.524	-0.070696
or	LL	1	2	1	4	28	Mon	LL	UR	44	37.8823	46.2909	37.8823	46.2909		112	112	84.1732	0.0998967	84.1732	0.0998967
or	UR	1	2	1	1	29	Mon	UR	LR	35	71.3807	107.959	71.3807	107.959		113	113	179.339	0.203959	179.339	0.203959
or	UL	1	2	1	2	29	Mon	UL	LR	35	181.069	53.4997	181.069	53.316		114	114	234.569	-0.543846	234.385	-0.545056
or	LR	1	2	1	3	29	Mon	LR	LL	35	79.0687	171.634	79.0687	171.236		115	115	250.703	0.369223	250.305	0.36822
or	LL	1	2	1	4	29	Mon	LL	UR	35	195.168	12.0591	195.168	11.7473		116	116	207.227	-0.883614	206.915	-0.886453
or	UR	1	2	1	1	30	Mon	UR	UL	54	8.90911	33.7404	8.90911	33.7404		117	117	42.6495	0.582217	42.6495	0.582217
or	UL	1	2	1	2	30	Mon	UL	LL	54	26.8246	28.7866	26.8246	28.7866		118	118	55.6112	0.0352812	55.6112	0.0352812
or	LR	1	2	1	3	30	Mon	LR	UR	54	40.41	21.0495	40.41	21.0495		119	119	61.4595	-0.315012	61.4595	-0.315012
or	LL	1	2	1	4	30	Mon	LL	UL	54	27.6354	29.1535	27.6354	29.1535		120	120	56.7889	0.0267327	56.7889	0.0267327
or	UR	1	2	1	1	31	Tue	UR	UL	6	51.2907	39.4157	51.2907	39.4157		121	121	90.7064	-0.130917	90.7064	-0.130917
or	UL	1	2	1	2	31	Tue	UL	LL	6	43.1292	42.9975	43.1292	42.8651		122	122	86.1267	-0.0015296	85.9943	-0.00307127
or	LR	1	2	1	3	31	Tue	LR	LL	6	34.6901	40.767	34.6901	40.2229		123	123	75.4572	0.0805348	74.913	0.0738562
or	LL	1	2	1	4	31	Tue	LL	UR	6	25.1841	39.5912	25.1841	39.5912		124	124	64.7753	0.222416	64.7753	0.222416
or	UR	1	2	1	1	32	Tue	UR	LR	19	43.3753	63.7104	43.3753	63.7104		125	125	107.086	0.189896	107.086	0.189896
or	UL	1	2	1	2	32	Tue	UL	UR	19	42.2777	69.384	42.2777	69.384		126	126	111.662	0.242754	111.662	0.242754
or	LR	1	2	1	3	32	Tue	LR	UL	19	54.0792	56.8674	54.0792	56.8674		127	127	110.947	0.0251315	110.947	0.0251315
or	LL	1	2	1	4	32	Tue	LL	LR	19	30.5068	49.0601	30.5068	49.0601		128	128	79.5669	0.233178	79.5669	0.233178
or	UR	1	2	1	1	33	Tue	UR	LR	28	41.5455	53.2538	41.5455	53.2538		129	129	94.7993	0.123506	94.7993	0.123506
or	UL	1	2	1	2	33	Tue	UL	LR	28	89.2644	20.3331	89.2644	20.3331		130	130	109.598	-0.62895	109.598	-0.62895
or	LR	1	2	1	3	33	Tue	LR	UR	28	65.5947	42.657	65.5947	42.657		131	131	108.252	-0.211892	108.252	-0.211892
or	LL	1	2	1	4	33	Tue	LL	UL	28	46.1668	27.4325	46.1668	27.4325		132	132	73.5993	-0.254545	73.5993	-0.254545
or	UR	1	2	1	1	34	Tue	UR	UL	45	15.0283	33.557	15.0283	33.557		133	133	48.5852	0.381365	48.5852	0.381365
or	UL	1	2	1	2	34	Tue	UL	LL	45	37.4364	55.253	37.4364	55.253		134	134	92.6895	0.192219	92.6895	0.192219
or	LR	1	2	1	3	34	Tue	LR	UR	45	34.1044	24.3999	34.1044	24.3999		135	135	58.5043	-0.165877	58.5043	-0.165877
or	LL	1	2	1	4	34	Tue	LL	UL	45	44.7267	45.2504	44.7267	45.2504		136	136	89.977	0.00582016	89.977	0.00582016
or	UR	1	2	1	1	35	Tue	UR	LL	36	49.7546	68.4843	49.7546	68.0774		137	137	118.239	0.158405	117.832	0.155499
or	UL	1	2	1	2	35	Tue	UL	LR	36	68.2209	49.768	68.2209	49.768		138	138	117.989	-0.156395	117.989	-0.156395
or	LR	1	2	1	3	35	Tue	LR	LL	36	43.5547	95.0785	43.5547	94.6141		139	139	138.633	0.371656	138.169	0.369544
or	LL	1	2	1	4	35	Tue	LL	UR	36	74.7909	45.2933	74.7909	45.2933		140	140	120.084	-0.245641	120.084	-0.245641
or	UR	1	2	1	1	36	Wed	UR	LR	55	30.9752	45.9321	30.9752	45.2658		141	141	76.9073	0.194479	76.2411	0.18744
or	UL	1	2	1	2	36	Wed	UL	LR	55	39.4187	58.4907	39.4187	58.4907		142	142	97.9093	0.194792	97.9093	0.194792
or	LR	1	2	1	3	36	Wed	LR	UR	55	61.017	22.9479	61.017	22.9479		143	143	83.9649	-0.453393	83.9649	-0.453393
or	LL	1	2	1	4	36	Wed	LL	UL	55	30.2503	24.1142	30.2503	24.1142		144	144	54.3645	-0.112868	54.3645	-0.112868
or	UR	1	2	1	1	37	Wed	UR	LL	7	24.927	46.9245	24.927	46.9245		145	145	71.8515	0.306152	71.8515	0.306152
or	UL	1	2	1	2	37	Wed	UL	LL	7	26.2864	58.0611	26.2864	58.0611		146	146	84.3475	0.376711	84.3475	0.376711
or	LR	1	2	1	3	37	Wed	LR	LL	7	20.0584	73.3707	20.0584	73.3707		147	147	93.4291	0.570618	93.4291	0.570618
or	LL	1	2	1	4	37	Wed	LL	UR	7	73.2772	41.8716	73.2772	41.8716		148	148	115.149	-0.27274	115.149	-0.27274
or	UR	1	2	1	1	38	Wed	UR	UL	20	12.8676	71.0751	12.8676	71.0751		149	149	83.9426	0.693419	83.9426	0.693419
or	UL	1	2	1	2	38	Wed	UL	LL	20	59.6468	106.28	59.6468	106.28	5sec before end stop	150	150	165.927	0.281048	165.927	0.281048
or	LR	1	2	1	3	38	Wed	LR	UL	20	38.0957	50.4995	38.0957	50.4995		151	151	88.5953	0.140006	88.5953	0.140006
or	LL	1	2	1	4	38	Wed	LL	UL	20	45.0693	53.9952	45.0693	53.9952		152	152	99.0646	0.0901021	99.0646	0.0901021
or	UR	1	2	1	1	39	Wed	UR	LR	29	14.1349	15.035	14.1349	15.035		153	153	29.1699	0.0308565	29.1699	0.0308565
or	UL	1	2	1	2	39	Wed	UL	UR	29	31.4967	17.6362	31.4967	17.6362		154	154	49.133	-0.282102	49.133	-0.282102
or	LR	1	2	1	3	39	Wed	LR	UR	29	30.5985	31.2281	30.5985	31.2281		155	155	61.8266	0.0101826	61.8266	0.0101826
or	LL	1	2	1	4	39	Wed	LL	LR	29	18.4598	25.0148	18.4598	25.0148		156	156	43.4746	0.150777	43.4746	0.150777
or	UR	1	2	1	1	40	Wed	UR	UL	46	30.108	112.104	30.108	111.429		157	157	142.212	0.576577	141.537	0.574557
or	UL	1	2	1	2	40	Wed	UL	LR	46	130.998	51.7156	130.595	51.7156		158	158	182.714	-0.433918	182.311	-0.432665
or	LR	1	2	1	3	40	Wed	LR	LL	46	58.8471	150.134	58.8471	149.638		159	159	208.981	0.436819	208.485	0.435479
or	LL	1	2	1	4	40	Wed	LL	UR	46	106.537	52.0889	106.537	51.683		160	160	158.626	-0.343247	158.22	-0.346693
or	UR	1	2	1	1	41	Thu	UR	LL	37	58.1588	58.9854	58.1588	58.9854		161	161	117.144	0.00705604	117.144	0.00705604
or	UL	1	2	1	2	41	Thu	UL	LL	37	77.9371	53.9318	77.9371	53.9318		162	162	131.869	-0.18204	131.869	-0.18204
or	LR	1	2	1	3	41	Thu	LR	UR	37	99.7095	73.9655	99.7095	73.9655		163	163	173.675	-0.148231	173.675	-0.148231
or	LL	1	2	1	4	41	Thu	LL	UR	37	66.9504	57.4368	66.9504	57.4368		164	164	124.387	-0.076484	124.387	-0.076484
or	UR	1	2	1	1	42	Thu	UR	LR	56	35.7104	36.5265	35.7104	36.5265		165	165	72.2369	0.0112982	72.2369	0.0112982
or	UL	1	2	1	2	42	Thu	UL	LR	56	50.9877	41.0228	50.9877	41.0228		166	166	92.0104	-0.108302	92.0104	-0.108302
or	LR	1	2	1	3	42	Thu	LR	LL	56	13.7022	75.1559	13.7022	75.1559		167	167	88.8582	0.691593	88.8582	0.691593
or	LL	1	2	1	4	42	Thu	LL	UL	56	60.7095	15.4811	60.7095	15.4811		168	168	76.1907	-0.593621	76.1907	-0.593621
or	UR	1	2	1	1	43	Thu	UR	LR	8	23.9177	23.4073	23.9177	23.4073		169	169	47.3251	-0.0107849	47.3251	-0.0107849
or	UL	1	2	1	2	43	Thu	UL	UR	8	40.3955	17.7014	40.3955	17.7014		170	170	58.0968	-0.390626	58.0968	-0.390626
or	LR	1	2	1	3	43	Thu	LR	LL	8	36.9634	54.9805	36.9634	54.5326		171	171	91.944	0.195958	91.496	0.192021
or	LL	1	2	1	4	43	Thu	LL	LR	8	45.5167	16.2011	44.3004	16.2011		172	172	61.7178	-0.474995	60.5015	-0.46444
or	UR	1	2	1	1	44	Thu	UR	UL	21	38.4111	89.7065	38.4111	89.7065		173	173	128.118	0.400377	128.118	0.400377
or	UL	1	2	1	2	44	Thu	UL	LL	21	25.54	53.5076	25.54	53.5076		174	174	79.0476	0.353807	79.0476	0.353807
or	LR	1	2	1	3	44	Thu	LR	UL	21	85.3876	64.2199	85.3876	64.2199		175	175	149.607	-0.141488	149.607	-0.141488
or	LL	1	2	1	4	44	Thu	LL	UR	21	47.6781	30.4952	47.6781	30.1871		176	176	78.1733	-0.219805	77.8652	-0.224631
or	UR	1	2	1	1	45	Thu	UR	UL	30	29.4258	83.6035	29.4258	83.6035		177	177	113.029	0.479324	113.029	0.479324
or	UL	1	2	1	2	45	Thu	UL	LR	30	94.9266	47.4353	94.9266	47.4353		178	178	142.362	-0.333596	142.362	-0.333596
or	LR	1	2	1	3	45	Thu	LR	UR	30	22.7549	92.2257	22.7549	92.2257		179	179	114.981	0.604195	114.981	0.604195
or	LL	1	2	1	4	45	Thu	LL	UL	30	69.2039	44.5277	69.2039	44.5277		180	180	113.732	-0.216969	113.732	-0.216969
or	UR	1	2	1	1	46	Fri	UR	LR	47	44.8744	46.8798	44.7681	46.8798		181	181	91.7542	0.0218558	91.6479	0.0230416
or	UL	1	2	1	2	46	Fri	UL	LL	47	36.8678	85.3631	36.8678	84.8229		182	182	122.231	0.396752	121.691	0.394074
or	LR	1	2	1	3	46	Fri	LR	LL	47	95.9635	56.0733	95.9635	56.0733		183	183	152.037	-0.262372	152.037	-0.262372
or	LL	1	2	1	4	46	Fri	LL	UR	47	53.4353	82.0545	53.4353	81.8492		184	184	135.49	0.211228	135.284	0.210031
or	UR	1	2	1	1	47	Fri	UR	UL	38	29.1538	66.7607	29.1538	66.4443		185	185	95.9145	0.392088	95.5981	0.390076
or	UL	1	2	1	2	47	Fri	UL	LR	38	80.0556	47.0683	80.0556	47.0683		186	186	127.124	-0.259489	127.124	-0.259489
or	LR	1	2	1	3	47	Fri	LR	UR	38	47.9843	73.4516	47.9843	73.4516		187	187	121.436	0.209718	121.436	0.209718
or	LL	1	2	1	4	47	Fri	LL	UR	38	73.867	35.479	73.867	34.9914		188	188	109.346	-0.351069	108.858	-0.357121
or	UR	1	2	1	1	48	Fri	UR	LR	57	66.3341	33.6535	66.3341	33.6535		189	189	99.9876	-0.326847	99.9876	-0.326847
or	UL	1	2	1	2	48	Fri	UL	LL	57	36.4466	51.0181	36.4466	51.0181		190	190	87.4648	0.166598	87.4648	0.166598
or	LR	1	2	1	3	48	Fri	LR	UR	57	53.7061	23.0252	53.7061	23.0252		191	191	76.7313	-0.399848	76.7313	-0.399848
or	LL	1	2	1	4	48	Fri	LL	UL	57	31.1404	30.7923	31.1404	30.7923		192	192	61.9327	-0.00562144	61.9327	-0.00562144
or	UR	1	2	1	1	49	Fri	UR	UL	9	33.8365	53.4403	33.8365	53.4403		193	193	87.2768	0.224617	87.2768	0.224617
or	UL	1	2	1	2	49	Fri	UL	LR	9	45.5014	40.3	45.5014	39.7136		194	194	85.8014	-0.0606209	85.215	-0.0679196
or	LR	1	2	1	3	49	Fri	LR	LL	9	34.6686	100.066	34.6686	100.066		195	195	134.735	0.48538	134.735	0.48538
or	LL	1	2	1	4	49	Fri	LL	UL	9	79.2348	36.0792	79.2348	36.0792		196	196	115.314	-0.374244	115.314	-0.374244
or	UR	1	2	1	1	50	Fri	UR	LL	22	10.624	28.4351	10.624	28.4351		197	197	39.0592	0.456003	39.0592	0.456003
or	UL	1	2	1	2	50	Fri	UL	UR	22	17.5485	17.2445	17.5485	17.2445		198	198	34.793	-0.00873992	34.793	-0.00873992
or	LR	1	2	1	3	50	Fri	LR	UL	22	23.9194	16.2001	23.9194	16.2001		199	199	40.1195	-0.192406	40.1195	-0.192406
or	LL	1	2	1	4	50	Fri	LL	LR	22	24.7472	21.2205	24.7472	21.2205		200	200	45.9677	-0.0767213	45.9677	-0.0767213
or	UR	1	3	1	1	51	Mon	UR	LL	31	35.0061	49.7482	35.0061	49.7482		201	201	84.7544	0.173939	84.7544	0.173939
or	UL	1	3	1	2	51	Mon	UL	UR	31	77.6627	51.8362	77.6627	51.8362		202	202	129.499	-0.199435	129.499	-0.199435
or	LR	1	3	1	3	51	Mon	LR	UL	31	61.6987	82.5271	61.6987	81.9434		203	203	144.226	0.144415	143.642	0.140939
or	LL	1	3	1	4	51	Mon	LL	LR	31	110.579	40.3758	110.579	40.3758		204	204	150.955	-0.46506	150.955	-0.46506
or	UR	1	3	1	1	52	Mon	UR	LR	48	40.1102	42.0297	40.1102	41.7141		205	205	82.14	0.0233688	81.8244	0.0196018
or	UL	1	3	1	2	52	Mon	UL	LL	48	50.9348	40.1295	50.9348	40.1295		206	206	91.0643	-0.118656	91.0643	-0.118656
or	LR	1	3	1	3	52	Mon	LR	UR	48	56.2277	44.5524	56.2277	44.5524		207	207	100.78	-0.11585	100.78	-0.11585
or	LL	1	3	1	4	52	Mon	LL	UL	48	65.3976	41.8372	65.3976	41.8372		208	208	107.235	-0.219709	107.235	-0.219709
or	UR	1	3	1	1	53	Mon	UR	UL	39	59.1013	74.7693	59.1013	74.7693		209	209	133.871	0.117038	133.871	0.117038
or	UL	1	3	1	2	53	Mon	UL	LR	39	47.6901	73.2435	47.6901	73.2435		210	210	120.934	0.211301	120.934	0.211301
or	LR	1	3	1	3	53	Mon	LR	LL	39	36.2711	108.693	36.2711	108.051		211	211	144.964	0.499584	144.322	0.497357
or	LL	1	3	1	4	53	Mon	LL	UR	39	72.1429	63.151	72.1429	63.151		212	212	135.294	-0.0664624	135.294	-0.0664624
or	UR	1	3	1	1	54	Mon	UR	LR	58	24.8378	35.8149	24.8378	35.8149		213	213	60.6527	0.180983	60.6527	0.180983
or	UL	1	3	1	2	54	Mon	UL	LR	58	33.2995	39.1472	33.2995	39.1472		214	214	72.4467	0.0807178	72.4467	0.0807178
or	LR	1	3	1	3	54	Mon	LR	UR	58	15.4823	26.7183	15.4823	26.7183		215	215	42.2005	0.266253	42.2005	0.266253
or	LL	1	3	1	4	54	Mon	LL	UL	58	27.8086	27.5488	27.8086	27.5488		216	216	55.3574	-0.00469256	55.3574	-0.00469256
or	UR	1	3	1	1	55	Mon	UR	UL	10	91.2288	130.267	91.2288	130.267		217	217	221.496	0.176249	221.496	0.176249
or	UL	1	3	1	2	55	Mon	UL	LL	10	127.181	77.3661	127.181	76.8698		218	218	204.547	-0.243536	204.05	-0.246561
or	LR	1	3	1	3	55	Mon	LR	LL	10	45.2455	206.844	45.2455	206.472		219	219	252.09	0.641036	251.717	0.640505
or	LL	1	3	1	4	55	Mon	LL	UR	10	75.9999	101.715	75.9999	101.715		220	220	177.715	0.144701	177.715	0.144701
or	UR	1	3	1	1	56	Tue	UR	UL	63	43.5465	58.6421	43.5465	58.6421		221	221	102.189	0.147724	102.189	0.147724
or	UL	1	3	1	2	56	Tue	UL	LR	63	66.495	52.9892	66.495	52.9463		222	222	119.484	-0.113035	119.441	-0.113434
or	LR	1	3	1	3	56	Tue	LR	LL	63	44.4578	47.8851	44.4578	47.8851		223	223	92.3429	0.0371158	92.3429	0.0371158
or	LL	1	3	1	4	56	Tue	LL	UR	63	49.2991	36.6283	49.2991	36.6283		224	224	85.9274	-0.14746	85.9274	-0.14746
or	UR	1	3	1	1	57	Tue	UR	LL	32	35.2581	58.0349	35.2581	57.3619		225	225	93.293	0.244142	92.62	0.238651
or	UL	1	3	1	2	57	Tue	UL	LL	32	64.7933	56.8618	64.7933	56.8618		226	226	121.655	-0.0651971	121.655	-0.0651971
or	LR	1	3	1	3	57	Tue	LR	LL	32	18.1996	54.1698	18.1996	54.1698		227	227	72.3694	0.497035	72.3694	0.497035
or	LL	1	3	1	4	57	Tue	LL	UL	32	46.4717	37.5274	46.4717	37.5274		228	228	83.9991	-0.106481	83.9991	-0.106481
or	UR	1	3	1	1	58	Tue	UR	LR	49	29.4743	54.2874	29.4743	54.0522		229	229	83.7616	0.296235	83.5265	0.294254
or	UL	1	3	1	2	58	Tue	UL	UR	49	64.3369	37.1682	64.3369	37.1682		230	230	101.505	-0.267659	101.505	-0.267659
or	LR	1	3	1	3	58	Tue	LR	UR	49	73.1248	48.4158	73.1248	48.3673		231	231	121.541	-0.203299	121.492	-0.203779
or	LL	1	3	1	4	58	Tue	LL	UR	49	67.3701	84.5501	67.3701	84.5501		232	232	151.92	0.113086	151.92	0.113086
or	UR	1	3	1	1	59	Tue	UR	LR	62	15.7524	30.5869	15.7524	30.5869		233	233	46.3393	0.320128	46.3393	0.320128
or	UL	1	3	1	2	59	Tue	UL	LL	62	64.2171	54.5025	64.2171	54.5025		234	234	118.72	-0.081828	118.72	-0.081828
or	LR	1	3	1	3	59	Tue	LR	UL	62	19.1679	52.07	19.1679	52.07		235	235	71.2379	0.461863	71.2379	0.461863
or	LL	1	3	1	4	59	Tue	LL	UL	62	45.0507	32.8437	45.0507	32.8437		236	236	77.8943	-0.156713	77.8943	-0.156713
or	UR	1	3	1	1	60	Tue	UR	UL	59	18.8013	22.8632	18.8013	22.8632		237	237	41.6645	0.0974888	41.6645	0.0974888
or	UL	1	3	1	2	60	Tue	UL	LR	59	4.95181	8.90846	4.95181	8.90846		238	238	13.8603	0.285467	13.8603	0.285467
or	LR	1	3	1	3	60	Tue	LR	UR	59	42.9334	19.0765	41.9856	19.0765		239	239	62.0098	-0.384728	61.0621	-0.375178
or	LL	1	3	1	4	60	Tue	LL	LR	59	21.8581	14.8371	21.8581	14.8371		240	240	36.6952	-0.191333	36.6952	-0.191333
or	UR	1	3	1	1	61	Wed	UR	LL	60	18.8013	22.8632	18.8013	22.8632		241	241	41.6645	0.0974888	41.6645	0.0974888
or	UL	1	3	1	2	61	Wed	UL	LL	60	4.95181	8.90846	4.95181	8.90846		242	242	13.8603	0.285467	13.8603	0.285467
or	LR	1	3	1	3	61	Wed	LR	UR	60	42.9334	19.0765	41.9856	19.0765		243	243	62.0098	-0.384728	61.0621	-0.375178
or	LL	1	3	1	4	61	Wed	LL	LR	60	21.8581	14.8371	21.8581	14.8371		244	244	36.6952	-0.191333	36.6952	-0.191333
or	UR	1	3	1	1	62	Wed	UR	LR	61	17.273	48.4774	17.273	48.4774		245	245	65.7504	0.474588	65.7504	0.474588
or	UL	1	3	1	2	62	Wed	UL	UR	61	34.3711	41.1717	34.3711	41.1717		246	246	75.5429	0.0900228	75.5429	0.0900228
or	LR	1	3	1	3	62	Wed	LR	UL	61	41.4042	41.0161	41.4042	41.0161		247	247	82.4203	-0.00470826	82.4203	-0.00470826
or	LL	1	3	1	4	62	Wed	LL	UL	61	28.2749	34.559	28.2749	34.559		248	248	62.8339	0.100012	62.8339	0.100012
or	UR	1	3	1	1	63	Wed	UR	UL	2	47.9594	49.6607	47.9594	49.6607		249	249	97.6201	0.0174281	97.6201	0.0174281
or	UL	1	3	1	2	63	Wed	UL	LR	2	79.0028	50.3815	79.0028	50.3815		250	250	129.384	-0.221211	129.384	-0.221211
or	LR	1	3	1	3	63	Wed	LR	LL	2	90.8163	49.0738	90.8163	49.0738		251	251	139.89	-0.298395	139.89	-0.298395
or	LL	1	3	1	4	63	Wed	LL	UR	2	68.1905	51.4755	68.1905	51.4755		252	252	119.666	-0.13968	119.666	-0.13968
or	UR	1	3	1	1	64	Wed	UR	UL	15	46.0648	58.671	46.0648	58.671		253	253	104.736	0.120362	104.736	0.120362
or	UL	1	3	1	2	64	Wed	UL	LR	15	19.8733	14.6763	19.8733	14.6763		254	254	34.5496	-0.150421	34.5496	-0.150421
or	LR	1	3	1	3	64	Wed	LR	UR	15	15.6845	57.7892	15.6845	57.7892		255	255	73.4737	0.573057	73.4737	0.573057
or	LL	1	3	1	4	64	Wed	LL	UR	15	38.6022	14.406	38.6022	14.406		256	256	53.0082	-0.456462	53.0082	-0.456462
or	UR	1	3	1	1	65	Wed	UR	LR	28	34.0859	54.6899	34.0859	54.6899		257	257	88.7759	0.23209	88.7759	0.23209
or	UL	1	3	1	2	65	Wed	UL	LL	28	106.929	46.946	106.929	46.946		258	258	153.875	-0.389817	153.875	-0.389817
or	LR	1	3	1	3	65	Wed	LR	LL	28	63.6186	74.7614	63.6186	74.7614		259	259	138.38	0.0805236	138.38	0.0805236
or	LL	1	3	1	4	65	Wed	LL	UL	28	114.574	31.7435	114.574	31.7435		260	260	146.317	-0.5661	146.317	-0.5661
or	UR	1	3	1	1	66	Thu	UR	UL	51	36.1626	63.6122	36.1626	63.6122		261	261	99.7748	0.275116	99.7748	0.275116
or	UL	1	3	1	2	66	Thu	UL	LR	51	56.2064	88.0861	56.2064	88.0861		262	262	144.293	0.220938	144.293	0.220938
or	LR	1	3	1	3	66	Thu	LR	UL	51	125.31	74.2768	124.666	74.2768		263	263	199.587	-0.255696	198.943	-0.253286
or	LL	1	3	1	4	66	Thu	LL	UR	51	59.7483	71.8137	59.7483	71.8137		264	264	131.562	0.0917085	131.562	0.0917085
or	UR	1	3	1	1	67	Thu	UR	LR	35	73.4308	73.2278	73.3862	73.2278		265	265	146.659	-0.00138394	146.614	-0.00107987
or	UL	1	3	1	2	67	Thu	UL	LL	35	149.624	80.5338	149.22	80.5338		266	266	230.158	-0.300185	229.753	-0.298954
or	LR	1	3	1	3	67	Thu	LR	LL	35	99.8681	139.125	99.8681	139.125		267	267	238.993	0.16426	238.993	0.16426
or	LL	1	3	1	4	67	Thu	LL	LR	35	136.354	97.8802	136.354	97.3837		268	268	234.234	-0.164253	233.737	-0.166726
or	UR	1	3	1	1	68	Thu	UR	LL	42	62.4133	122.28	62.1888	122.28		269	269	184.693	0.324142	184.469	0.325753
or	UL	1	3	1	2	68	Thu	UL	LR	42	70.0901	86.9125	70.0901	86.9125		270	270	157.003	0.107147	157.003	0.107147
or	LR	1	3	1	3	68	Thu	LR	LL	42	84.3962	117.826	84.3962	117.826		271	271	202.222	0.165312	202.222	0.165312
or	LL	1	3	1	4	68	Thu	LL	UL	42	96.8931	43.6416	96.8538	43.6416		272	272	140.535	-0.378921	140.495	-0.378747
or	UR	1	3	1	1	69	Thu	UR	LR	3	21.7796	29.7017	21.7796	29.7017		273	273	51.4813	0.153883	51.4813	0.153883
or	UL	1	3	1	2	69	Thu	UL	UR	3	33.2823	29.8851	33.2823	29.8851		274	274	63.1674	-0.0537812	63.1674	-0.0537812
or	LR	1	3	1	3	69	Thu	LR	UR	3	27.0024	26.5083	27.0024	26.5083		275	275	53.5108	-0.0092339	53.5108	-0.0092339
or	LL	1	3	1	4	69	Thu	LL	UL	3	9.83521	20.5102	9.83521	20.5102		276	276	30.3454	0.351784	30.3454	0.351784
or	UR	1	3	1	1	70	Thu	UR	UL	16	0	0	0	0		277	277
or	UL	1	3	1	2	70	Thu	UL	LL	16	92.0652	121.993	92.0202	121.993		278	278	214.059	0.139813	214.014	0.140053
or	LR	1	3	1	3	70	Thu	LR	UR	16	67.6446	8.5521	67.6446	8.5521		279	279	76.1967	-0.775526	76.1967	-0.775526
or	LL	1	3	1	4	70	Thu	LL	UR	16	100.8	29.0681	100.395	29.0681		280	280	129.868	-0.552344	129.463	-0.550942
or	UR	1	3	1	1	71	Fri	UR	LR	29	10.3556	32.9422	10.3556	32.9422		281	281	43.2979	0.521656	43.2979	0.521656
or	UL	1	3	1	2	71	Fri	UL	LL	29	25.1044	29.4197	25.1044	29.4197		282	282	54.5241	0.0791444	54.5241	0.0791444
or	LR	1	3	1	3	71	Fri	LR	LL	29	13.1392	45.2476	13.1392	45.0234		283	283	58.3868	0.549925	58.1626	0.548191
or	LL	1	3	1	4	71	Fri	LL	UL	29	16.6511	24.4799	16.6511	24.4799		284	284	41.131	0.190339	41.131	0.190339
or	UR	1	3	1	1	72	Fri	UR	UL	52	20.3331	51.4555	20.3331	51.4555		285	285	71.7886	0.433529	71.7886	0.433529
or	UL	1	3	1	2	72	Fri	UL	LR	52	78.6435	37.951	78.6435	37.951		286	286	116.594	-0.349009	116.594	-0.349009
or	LR	1	3	1	3	72	Fri	LR	UR	52	78.4467	21.7802	78.4467	21.7802		287	287	100.227	-0.565383	100.227	-0.565383
or	LL	1	3	1	4	72	Fri	LL	UR	52	39.5686	27.2527	39.5686	27.2527		288	288	66.8212	-0.184311	66.8212	-0.184311
or	UR	1	3	1	1	73	Fri	UR	UL	36	34.5374	77.0915	33.8652	77.0915		289	289	111.629	0.38121	110.957	0.389578
or	UL	1	3	1	2	73	Fri	UL	LL	36	85.9102	96.9085	85.9102	96.9085		290	290	182.819	0.0601594	182.819	0.0601594
or	LR	1	3	1	3	73	Fri	LR	LL	36	32.7599	92.0389	32.7599	92.0389		291	291	124.799	0.474997	124.799	0.474997
or	LL	1	3	1	4	73	Fri	LL	UR	36	111.912	22.5001	111.912	22.0037		292	292	134.412	-0.665207	133.915	-0.671379
or	UR	1	3	1	1	74	Fri	UR	LR	43	31.9313	27.3599	31.9313	27.3599		293	293	59.2912	-0.0771001	59.2912	-0.0771001
or	UL	1	3	1	2	74	Fri	UL	LR	43	31.1107	22.3197	31.1107	22.3197		294	294	53.4304	-0.164533	53.4304	-0.164533
or	LR	1	3	1	3	74	Fri	LR	UR	43	62.0816	44.9819	62.0816	44.9819		295	295	107.064	-0.159716	107.064	-0.159716
or	LL	1	3	1	4	74	Fri	LL	UL	43	42.2046	21.2363	42.2046	21.2363		296	296	63.4409	-0.330516	63.4409	-0.330516
or	UR	1	3	1	1	75	Fri	UR	LL	4	13.408	64.9338	13.408	64.9338		297	297	78.3419	0.657704	78.3419	0.657704
or	UL	1	3	1	2	75	Fri	UL	UR	4	38.8842	22.1483	38.8842	22.1483		298	298	61.0326	-0.274213	61.0326	-0.274213
or	LR	1	3	1	3	75	Fri	LR	UL	4	50.1142	45.6018	50.1142	45.6018		299	299	95.716	-0.0471433	95.716	-0.0471433
or	LL	1	3	1	4	75	Fri	LL	LR	4	30.8715	16.8284	30.4705	16.8284		300	300	47.6999	-0.294406	47.2989	-0.288424
or	UR	1	4	1	1	76	Wed	UR	LL	17	18.7012	33.9145	18.2979	33.9145		301	301	52.6157	0.289141	52.2124	0.299098
or	UL	1	4	1	2	76	Wed	UL	UR	17	16.4995	17.6788	16.4995	17.6788		302	302	34.1783	0.0345051	34.1783	0.0345051
or	LR	1	4	1	3	76	Wed	LR	UL	17	26.1883	33.7192	26.1883	33.7192		303	303	59.9075	0.125709	59.9075	0.125709
or	LL	1	4	1	4	76	Wed	LL	LR	17	14.1754	13.7877	14.1754	13.7877		304	304	27.9631	-0.0138651	27.9631	-0.0138651
or	UR	1	4	1	1	77	Wed	UR	LR	30	47.2043	25.4667	47.2043	25.4667		305	305	72.671	-0.299123	72.671	-0.299123
or	UL	1	4	1	2	77	Wed	UL	LR	30	53.7563	33.6907	53.7563	33.6907		306	306	87.447	-0.229459	87.447	-0.229459
or	LR	1	4	1	3	77	Wed	LR	UR	30	43.7721	36.2135	43.7721	36.2135		307	307	79.9856	-0.0944997	79.9856	-0.0944997
or	LL	1	4	1	4	77	Wed	LL	UL	30	40.6918	22.0328	40.6918	21.716		308	308	62.7246	-0.297474	62.4078	-0.304061
or	UR	1	4	1	1	78	Wed	UR	UL	53	20.403	43.4055	20.403	43.4055		309	309	63.8084	0.360493	63.8084	0.360493
or	UL	1	4	1	2	78	Wed	UL	LL	53	57.7665	49.619	57.7665	49.619		310	310	107.386	-0.0758716	107.386	-0.0758716
or	LR	1	4	1	3	78	Wed	LR	LL	53	18.7008	119.025	18.7008	119.025		311	311	137.726	0.728435	137.726	0.728435
or	LL	1	4	1	4	78	Wed	LL	UR	53	78.5147	28.8781	78.5147	28.8781		312	312	107.393	-0.462197	107.393	-0.462197
or	UR	1	4	1	1	79	Wed	UR	LR	37	54.4433	49.5311	54.0192	49.5311		313	313	103.974	-0.0472449	103.55	-0.0433423
or	UL	1	4	1	2	79	Wed	UL	LL	37	126.267	89.2713	126.267	88.7763		314	314	215.539	-0.171645	215.044	-0.174342
or	LR	1	4	1	3	79	Wed	LR	UR	37	113.201	85.6794	113.201	85.6794		315	315	198.88	-0.138382	198.88	-0.138382
or	LL	1	4	1	4	79	Wed	LL	UL	37	118.655	75.7529	118.519	75.7529		316	316	194.408	-0.220683	194.272	-0.220137
or	UR	1	4	1	1	80	Wed	UR	UL	44	24.8098	45.9471	24.8098	45.9471		317	317	70.7569	0.298732	70.7569	0.298732
or	UL	1	4	1	2	80	Wed	UL	LR	44	144.956	32.313	144.956	32.313		318	318	177.269	-0.635435	177.269	-0.635435
or	LR	1	4	1	3	80	Wed	LR	LL	44	41.8345	76.9294	41.8345	76.9294		319	319	118.764	0.295502	118.764	0.295502
or	LL	1	4	1	4	80	Wed	LL	UR	44	48.7511	20.9485	48.7511	20.9485		320	320	69.6996	-0.398891	69.6996	-0.398891
or	UR	1	4	1	1	81	Thu	LR	LL	27	120.336	167.693	22.4581	26.9586		321	321	288.029	0.164417	49.4167	0.0910718
or	UL	1	4	1	2	81	Thu	LL	UR	27	249.028	117.563	57.1154	21.6		322	322	366.591	-0.358615	78.7154	-0.451188
or	LR	1	4	1	3	81	Thu	UR	UL	27	96.4376	245.613	12.4108	18.5018		323	323	342.051	0.436121	30.9126	0.197041
or	LL	1	4	1	4	81	Thu	UL	LR	27	98.6091	158.443	14.7468	12.6936		324	324	257.052	0.232771	27.4404	-0.0748257
or	UR	1	4	1	1	82	Fri	UR	LL	50	54.2322	80.2177	18.7705	23.7386		325	325	134.45	0.193272	42.5092	0.116871
or	UL	1	4	1	2	82	Fri	UL	UR	50	125.816	102.525	65.1599	37.3875		326	326	228.342	-0.102001	102.547	-0.270825
or	LR	1	4	1	3	82	Fri	LR	UL	50	158.321	83.671	78.7526	51.4014		327	327	241.992	-0.30848	130.154	-0.210145
or	LL	1	4	1	4	82	Fri	LL	LR	50	78.7532	69.3605	39.5829	20.9602		328	328	148.114	-0.0634156	60.5431	-0.307594
or	UL	1	1	1	5	1	Mon	UL	LL	18	46.532	35.7164	46.532	35.7164		1		82.2484	-0.1315	82.2484	-0.1315
or	LR	1	1	1	6	1	Mon	LR	LL	18	53.596	84.6499	53.596	84.6499		2		138.246	0.224628	138.246	0.224628
or	LL	1	1	1	7	1	Mon	LL	LR	18	70.762	61.044	70.762	61.044		3		131.806	-0.0737302	131.806	-0.0737302
or	LL	1	1	1	8	1	Mon	UR	LR	18	50.2979	54.1459	50.2979	53.8623		4		104.444	0.036843	104.16	0.0342209
or	UL	1	1	1	5	2	Mon	UL	UR	27	41.1526	41.4418	41.1526	41.4418		5		82.5945	0.00350183	82.5945	0.00350183
or	LR	1	1	1	6	2	Mon	LR	UL	27	34.483	50.8494	34.483	50.3485		6		85.3323	0.191796	84.8314	0.187024
or	LL	1	1	1	7	2	Mon	LL	UR	27	44.9876	63.2878	44.9876	63.2878		7		108.275	0.169015	108.275	0.169015
or	LL	1	1	1	8	2	Mon	UR	UL	27	58.9968	57.4236	58.9968	57.4236		8		116.42	-0.0135135	116.42	-0.0135135
or	UL	1	1	1	5	3	Mon	UL	LR	44	37.3462	34.8084	37.3462	34.8084		9		72.1546	-0.0351722	72.1546	-0.0351722
or	LR	1	1	1	6	3	Mon	LR	LL	44	26.7305	47.8342	26.7305	47.8342		10		74.5647	0.283024	74.5647	0.283024
or	LL	1	1	1	7	3	Mon	LL	UL	44	39.8222	50.6621	39.8222	50.6621		11		90.4843	0.119798	90.4843	0.119798
or	LL	1	1	1	8	3	Mon	UR	LL	44	65.4014	56.1685	65.4014	56.1685		12		121.57	-0.0759476	121.57	-0.0759476
or	UL	1	1	1	5	4	Mon	UL	UR	35	64.7193	70.4449	64.4347	70.4449		13		135.164	0.0423599	134.88	0.0445599
or	LR	1	1	1	6	4	Mon	LR	UR	35	59.8029	80.7783	59.8029	80.4927		14		140.581	0.149206	140.296	0.147473
or	LL	1	1	1	7	4	Mon	LL	LR	35	93.1205	84.2767	93.1205	84.2767		15		177.397	-0.0498531	177.397	-0.0498531
or	LL	1	1	1	8	4	Mon	UR	UL	35	138.155	99.1488	137.672	99.1488		16		237.304	-0.164372	236.821	-0.162668
or	UL	1	1	1	5	5	Mon	UL	LR	54	31.9997	38.6551	31.9997	38.6551		17		70.6548	0.0941953	70.6548	0.0941953
or	LR	1	1	1	6	5	Mon	LR	UL	54	37.1014	26.2543	37.1014	26.2543		18		63.3557	-0.171211	63.3557	-0.171211
or	LL	1	1	1	7	5	Mon	LL	UR	54	45.4003	37.8986	45.4003	37.8986		19		83.2988	-0.0900574	83.2988	-0.0900574
or	LL	1	1	1	8	5	Mon	UR	LL	54	33.1402	25.7962	32.9572	25.7962		20		58.9364	-0.124608	58.7534	-0.121881
or	UL	1	1	1	5	6	Tue	UL	UR	6	54.242	73.8589	54.242	73.5743		21		128.101	0.153136	127.816	0.151251
or	LR	1	1	1	6	6	Tue	LR	UL	6	52.6038	100.809	52.6038	100.809		22		153.413	0.314219	153.413	0.314219
or	LL	1	1	1	7	6	Tue	LL	UR	6	76.3047	82.7653	76.3047	82.7653		23		159.07	0.0406148	159.07	0.0406148
or	LL	1	1	1	8	6	Tue	UR	UL	6	84.0762	77.3321	84.0762	77.1081		24		161.408	-0.0417829	161.184	-0.0432303
or	UL	1	1	1	5	7	Tue	UL	LR	19	45.0837	39.5963	45.0837	39.5126		25		84.6801	-0.0648016	84.5964	-0.0658552
or	LR	1	1	1	6	7	Tue	LR	LL	19	28.1683	55.3383	28.1683	55.3383		26		83.5066	0.325364	83.5066	0.325364
or	LL	1	1	1	7	7	Tue	LL	LR	19	41.1151	64.8904	41.1151	64.8904		27		106.005	0.224283	106.005	0.224283
or	LL	1	1	1	8	7	Tue	UR	LR	19	52.4485	54.98	52.4485	54.98		28		107.428	0.0235643	107.428	0.0235643
or	UL	1	1	1	5	8	Tue	UL	LR	28	58.7559	63.1729	58.7559	63.1729		29		121.929	0.0362262	121.929	0.0362262
or	LR	1	1	1	6	8	Tue	LR	UR	28	40.2161	44.0164	39.9921	44.0164		30		84.2325	0.0451172	84.0085	0.0479033
or	LL	1	1	1	7	8	Tue	LL	LR	28	57.0961	42.195	56.6962	42.195		31		99.2912	-0.150075	98.8912	-0.146637
or	LL	1	1	1	8	8	Tue	UR	LL	28	42.1219	71.8058	42.1219	71.8058		32		113.928	0.260551	113.928	0.260551
or	UL	1	1	1	5	9	Tue	UL	LL	45	126.883	56.2168	126.883	56.2168		33		183.1	-0.385944	183.1	-0.385944
or	LR	1	1	1	6	9	Tue	LR	LL	45	48.8566	49.5936	48.8566	49.5936		34		98.4502	0.00748572	98.4502	0.00748572
or	LL	1	1	1	7	9	Tue	LL	UL	45	45.8999	42.7279	45.8999	42.7279		35		88.6278	-0.0357895	88.6278	-0.0357895
or	LL	1	1	1	8	9	Tue	UR	LL	45	106.082	64.6928	106.082	64.6928		36		170.775	-0.242362	170.775	-0.242362
or	UL	1	1	1	5	10	Tue	UL	UR	36	64.6876	96.9953	64.6876	96.9953		37		161.683	0.199821	161.683	0.199821
or	LR	1	1	1	6	10	Tue	LR	UL	36	44.8212	66.6907	44.8212	66.6907		38		111.512	0.196118	111.512	0.196118
or	LL	1	1	1	7	10	Tue	LL	UR	36	83.4154	50.6685	83.4154	50.6685		39		134.084	-0.244227	134.084	-0.244227
or	LL	1	1	1	8	10	Tue	UR	UL	36	59.2007	149.091	59.2007	149.091		40		208.291	0.431558	208.291	0.431558
or	UL	1	1	1	5	11	Wed	UL	LR	55	36.4062	50.986	36.4062	50.986		41		87.3922	0.166832	87.3922	0.166832
or	LR	1	1	1	6	11	Wed	LR	UL	55	37.2569	45.6331	37.2569	45.6331		42		82.89	0.101051	82.89	0.101051
or	LL	1	1	1	7	11	Wed	LL	UL	55	37.9995	33.4736	37.9995	33.4736		43		71.4731	-0.0633233	71.4731	-0.0633233
or	LL	1	1	1	8	11	Wed	UR	UL	55	23.3004	46.8953	23.3004	46.8953		44		70.1956	0.336131	70.1956	0.336131
or	UL	1	1	1	5	12	Wed	UL	UR	7	94.7868	147.762	94.7868	147.762		45		242.549	0.218411	242.549	0.218411
or	LR	1	1	1	6	12	Wed	LR	UR	7	74.6623	79.4849	74.0767	79.4849		46		154.147	0.0312853	153.562	0.035218
or	LL	1	1	1	7	12	Wed	LL	LR	7	145.331	105.569	144.654	105.569		47		250.901	-0.158477	250.223	-0.1562
or	LL	1	1	1	8	12	Wed	UR	LL	7	94.2873	95.8963	94.2873	95.4125		48		190.184	0.00846066	189.7	0.00593166
or	UL	1	1	1	5	13	Wed	UL	LL	20	62.3369	40.7037	62.3369	40.7037		49		103.041	-0.209948	103.041	-0.209948
or	LR	1	1	1	6	13	Wed	LR	LL	20	38.6874	72.3137	38.6874	72.3137		50		111.001	0.302936	111.001	0.302936
or	LL	1	1	1	7	13	Wed	LL	UR	20	65.4778	46.0681	65.4778	46.0681		51		111.546	-0.174007	111.546	-0.174007
or	LL	1	1	1	8	13	Wed	UR	UL	20	25.2999	108.757	25.2999	108.757		52		134.057	0.622551	134.057	0.622551
or	UL	1	1	1	5	14	Wed	UL	LR	29	48.2806	63.9764	48.2806	63.9764		53		112.257	0.13982	112.257	0.13982
or	LR	1	1	1	6	14	Wed	LR	LL	29	70.4084	38.8602	70.4084	38.8602		54		109.269	-0.288721	109.269	-0.288721
or	LL	1	1	1	7	14	Wed	LL	LR	29	32.5032	36.435	32.5032	36.2992		55		68.9383	0.0570334	68.8024	0.0551717
or	LL	1	1	1	8	14	Wed	UR	LR	29	54.7693	65.4734	54.7693	65.4734		56		120.243	0.089021	120.243	0.089021
or	UL	1	1	1	5	15	Wed	UL	UR	46	52.9183	83.2909	52.9183	83.2909		57		136.209	0.222986	136.209	0.222986
or	LR	1	1	1	6	15	Wed	LR	UL	46	49.0776	49.0773	49.0776	48.9932		58		98.1549	-2.26173e-06	98.0708	-0.000860307
or	LL	1	1	1	7	15	Wed	LL	UR	46	27.6143	89.0771	27.6143	89.0771		59		116.691	0.526712	116.691	0.526712
or	LL	1	1	1	8	15	Wed	UR	LL	46	70.8581	57.5843	70.8581	57.5843		60		128.442	-0.103344	128.442	-0.103344
or	UL	1	1	1	5	16	Thu	UL	UR	37	41.6972	64.563	41.6972	64.563		61		106.26	0.215186	106.26	0.215186
or	LR	1	1	1	6	16	Thu	LR	LL	37	32.7147	35.2795	32.7147	35.2795		62		67.9942	0.0377207	67.9942	0.0377207
or	LL	1	1	1	7	16	Thu	LL	LR	37	66.0472	103.067	66.0472	103.067		63		169.114	0.218902	169.114	0.218902
or	LL	1	1	1	8	16	Thu	UR	LL	37	68.4088	84.5419	68.4088	84.5419		64		152.951	0.105479	152.951	0.105479
or	UL	1	1	1	5	17	Thu	UL	LR	56	85.7705	60.8697	85.7705	60.8697		65		146.64	-0.169809	146.64	-0.169809
or	LR	1	1	1	6	17	Thu	LR	UL	56	36.177	55.047	36.177	55.047		66		91.2241	0.206853	91.2241	0.206853
or	LL	1	1	1	7	17	Thu	LL	UR	56	46.6946	42.1721	46.6946	42.1721		67		88.8667	-0.0508899	88.8667	-0.0508899
or	LL	1	1	1	8	17	Thu	UR	LR	56	78.2476	61.9289	78.2476	61.9289		68		140.177	-0.116416	140.177	-0.116416
or	UL	1	1	1	5	18	Thu	UL	LL	8	57.4289	76.6322	57.4289	76.6322		69		134.061	0.143243	134.061	0.143243
or	LR	1	1	1	6	18	Thu	LR	LL	8	56.7963	88.8974	56.7963	88.8974		70		145.694	0.220333	145.694	0.220333
or	LL	1	1	1	7	18	Thu	LL	LR	8	69.6953	65.1331	69.6953	65.1331		71		134.828	-0.0338371	134.828	-0.0338371
or	LL	1	1	1	8	18	Thu	UR	UL	8	62.7681	105.929	62.7681	105.929		72		168.697	0.255849	168.697	0.255849
or	UL	1	1	1	5	19	Thu	UL	UR	21	12.3353	42.831	12.3353	42.831		73		55.1663	0.552796	55.1663	0.552796
or	LR	1	1	1	6	19	Thu	LR	UR	21	43.3478	52.065	43.3478	52.065		74		95.4129	0.0913627	95.4129	0.0913627
or	LL	1	1	1	7	19	Thu	LL	UL	21	42.8451	36.5223	42.4415	36.5223		75		79.3674	-0.0796652	78.9638	-0.0749606
or	LL	1	1	1	8	19	Thu	UR	UL	21	60.4443	52.929	60.4443	52.929		76		113.373	-0.0662887	113.373	-0.0662887
or	UL	1	1	1	5	20	Thu	UL	LR	30	36.2656	62.6156	36.2656	62.6156		77		98.8812	0.266481	98.8812	0.266481
or	LR	1	1	1	6	20	Thu	LR	UL	30	45.1754	34.6241	45.1754	34.6241		78		79.7995	-0.132222	79.7995	-0.132222
or	LL	1	1	1	7	20	Thu	LL	UR	30	42.344	39.1342	42.344	39.1342		79		81.4783	-0.0393946	81.4783	-0.0393946
or	LL	1	1	1	8	20	Thu	UR	LL	30	32.2858	58.6735	32.2858	58.6735		80		90.9593	0.290105	90.9593	0.290105
or	UL	1	1	1	5	21	Fri	UL	LR	47	33.09	47.0958	33.09	47.0958		81		80.1858	0.174667	80.1858	0.174667
or	LR	1	1	1	6	21	Fri	LR	UL	47	39.1653	46.6142	39.1653	46.6142		82		85.7796	0.0868376	85.7796	0.0868376
or	LL	1	1	1	7	21	Fri	LL	LR	47	56.1178	108.589	56.1178	108.099		83		164.707	0.318573	164.217	0.316541
or	LL	1	1	1	8	21	Fri	UR	UL	47	72.8186	60.2228	72.3108	60.2228		84		133.041	-0.0946751	132.534	-0.0912064
or	UL	1	1	1	5	22	Fri	UL	UR	38	66.3095	60.8906	66.3095	60.8906		85		127.2	-0.0426014	127.2	-0.0426014
or	LR	1	1	1	6	22	Fri	LR	LL	38	40.7765	67.4052	40.5929	67.4052		86		108.182	0.246149	107.998	0.248266
or	LL	1	1	1	7	22	Fri	LL	UR	38	26.5048	62.959	26.5048	62.959		87		89.4637	0.407474	89.4637	0.407474
or	LL	1	1	1	8	22	Fri	UR	LL	38	97.5084	88.948	97.5084	88.948		88		186.456	-0.045911	186.456	-0.045911
or	UL	1	1	1	5	23	Fri	UL	UR	57	24.553	39.3547	24.0593	39.3547		89		63.9077	0.231612	63.4141	0.241199
or	LR	1	1	1	6	23	Fri	LR	LL	57	32.6655	45.6894	32.6655	45.6894		90		78.3549	0.166216	78.3549	0.166216
or	LL	1	1	1	7	23	Fri	LL	UR	57	23.7922	19.3854	23.7922	19.3854		91		43.1777	-0.102062	43.1777	-0.102062
or	LL	1	1	1	8	23	Fri	UR	UL	57	19.5216	36.3294	19.5216	36.3294		92		55.8509	0.300941	55.8509	0.300941
or	UL	1	1	1	5	24	Fri	UL	LR	9	70.8514	114.473	70.8514	114.473		93		185.324	0.235377	185.324	0.235377
or	LR	1	1	1	6	24	Fri	LR	UL	9	66.7469	93.2423	66.5604	93.2423		94		159.989	0.165607	159.803	0.166968
or	LL	1	1	1	7	24	Fri	LL	LR	9	45.0797	103.075	45.0797	95.0287		95		148.155	0.391451	140.108	0.356502
or	LL	1	1	1	8	24	Fri	UR	LL	9	20.4822	145.199	20.4822	145.199		96		165.681	0.752752	165.681	0.752752
or	UL	1	1	1	5	25	Fri	UL	LL	22	22.2134	34.4836	22.2134	34.4836		97		56.697	0.216416	56.697	0.216416
or	LR	1	1	1	6	25	Fri	LR	UR	22	34.0935	22.8253	34.0935	22.8253		98		56.9189	-0.19797	56.9189	-0.19797
or	LL	1	1	1	7	25	Fri	LL	UL	22	10.8806	88.496	10.8806	88.0285		99		99.3766	0.781023	98.9091	0.779988
or	LL	1	1	1	8	25	Fri	UR	LR	22	43.543	40.8281	43.543	40.8281		100		84.3711	-0.0321785	84.3711	-0.0321785
or	UL	1	2	1	5	26	Mon	UL	LL	31	54.8213	53.1624	54.8213	53.1624		101		107.984	-0.0153624	107.984	-0.0153624
or	LR	1	2	1	6	26	Mon	LR	UR	31	43.6963	57.7591	43.6963	57.7591		102		101.455	0.13861	101.455	0.13861
or	LL	1	2	1	7	26	Mon	LL	UL	31	45.9898	70.4356	45.9898	70.4356		103		116.425	0.209969	116.425	0.209969
or	LL	1	2	1	8	26	Mon	UR	LR	31	68.774	59.9885	68.774	59.9885		104		128.762	-0.0682302	128.762	-0.0682302
or	UL	1	2	1	5	27	Mon	UL	LR	48	28.4841	43.4614	28.4841	43.4614		105		71.9455	0.208176	71.9455	0.208176
or	LR	1	2	1	6	27	Mon	LR	LL	48	31.1705	58.9374	31.1705	58.9374		106		90.108	0.308151	90.108	0.308151
or	LL	1	2	1	7	27	Mon	LL	LR	48	37.1506	47.5733	37.1506	47.5733		107		84.7239	0.123019	84.7239	0.123019
or	LL	1	2	1	8	27	Mon	UR	UL	48	28.6785	50.9541	28.6785	50.9541		108		79.6326	0.27973	79.6326	0.27973
or	UL	1	2	1	5	28	Mon	UL	UR	39	90.6257	93.368	90.6257	93.368		109		183.994	0.0149042	183.994	0.0149042
or	LR	1	2	1	6	28	Mon	LR	UL	39	59.8397	57.6707	59.8397	57.6707		110		117.51	-0.0184579	117.51	-0.0184579
or	LL	1	2	1	7	28	Mon	LL	UR	39	75.9917	69.1474	75.9917	69.1474		111		145.139	-0.047157	145.139	-0.047157
or	LL	1	2	1	8	28	Mon	UR	LL	39	67.0867	106.511	66.3988	106.511		112		173.598	0.227103	172.91	0.231985
or	UL	1	2	1	5	29	Mon	UL	LR	58	61.5168	37.8063	61.5168	37.8063		113		99.323	-0.238721	99.323	-0.238721
or	LR	1	2	1	6	29	Mon	LR	UL	58	46.3297	55.2531	46.3297	50.3691		114		101.583	0.0878428	96.6988	0.0417724
or	LL	1	2	1	7	29	Mon	LL	LR	58	26.878	41.5491	26.878	41.5491		115		68.4271	0.214406	68.4271	0.214406
or	LL	1	2	1	8	29	Mon	UR	LL	58	44.6839	80.1958	44.6839	80.1958		116		124.88	0.284369	124.88	0.284369
or	UL	1	2	1	5	30	Mon	UL	UR	10	65.2589	52.8382	65.2589	52.8382		117		118.097	-0.105174	118.097	-0.105174
or	LR	1	2	1	6	30	Mon	LR	LL	10	52.1497	50.2996	52.1497	50.2996		118		102.449	-0.0180589	102.449	-0.0180589
or	LL	1	2	1	7	30	Mon	LL	UR	10	37.3817	41.7714	37.3817	41.7714		119		79.1531	0.0554592	79.1531	0.0554592
or	LL	1	2	1	8	30	Mon	UR	UL	10	21.6018	37.1715	21.6018	37.1715		120		58.7733	0.264911	58.7733	0.264911
or	UL	1	2	1	5	31	Tue	UL	UR	63	100.37	33.7786	100.37	33.7786		121		134.149	-0.496401	134.149	-0.496401
or	LR	1	2	1	6	31	Tue	LR	LL	63	34.2839	52.5456	34.2839	52.5456		122		86.8295	0.210317	86.8295	0.210317
or	LL	1	2	1	7	31	Tue	LL	LR	63	28.5901	37.546	28.5901	37.546		123		66.1361	0.135416	66.1361	0.135416
or	LL	1	2	1	8	31	Tue	UR	LL	63	49.8229	69.9382	49.8229	69.9382		124		119.761	0.167962	119.761	0.167962
or	UL	1	2	1	5	32	Tue	UL	LR	32	69.5403	112.677	69.5403	112.273		125		182.217	0.236732	181.813	0.235036
or	LR	1	2	1	6	32	Tue	LR	UR	32	49.1106	62.2684	49.1106	62.2684		126		111.379	0.118136	111.379	0.118136
or	LL	1	2	1	7	32	Tue	LL	UL	32	66.0754	50.7482	66.0754	50.4634		127		116.824	-0.1312	116.539	-0.133964
or	LL	1	2	1	8	32	Tue	UR	LR	32	45.6498	148.963	45.6498	148.579		128		194.612	0.530864	194.229	0.529938
or	UL	1	2	1	5	33	Tue	UL	LR	49	73.7814	89.004	73.7814	89.004		129		162.785	0.0935132	162.785	0.0935132
or	LR	1	2	1	6	33	Tue	LR	UL	49	67.4918	54.7387	67.0841	54.7387		130		122.23	-0.104337	121.823	-0.101339
or	LL	1	2	1	7	33	Tue	LL	UR	49	116.705	75.3685	116.705	75.3685		131		192.074	-0.215213	192.074	-0.215213
or	LL	1	2	1	8	33	Tue	UR	UL	49	75.025	105.322	75.025	105.322		132		180.347	0.167994	180.347	0.167994
or	UL	1	2	1	5	34	Tue	UL	UR	62	38.9753	41.5513	38.9753	41.5513		133		80.5265	0.0319891	80.5265	0.0319891
or	LR	1	2	1	6	34	Tue	LR	LL	62	45.8732	74.1858	45.8732	74.1858		134		120.059	0.235823	120.059	0.235823
or	LL	1	2	1	7	34	Tue	LL	UR	62	64.8583	27.5663	64.8583	27.5663		135		92.4246	-0.403485	92.4246	-0.403485
or	LL	1	2	1	8	34	Tue	UR	UL	62	44.9142	80.7218	44.9142	80.7218		136		125.636	0.285011	125.636	0.285011
or	UL	1	2	1	5	35	Tue	UL	LL	59	24.9974	59.5581	24.9974	59.5581		137		84.5554	0.408734	84.5554	0.408734
or	LR	1	2	1	6	35	Tue	LR	UL	59	98.8422	56.5288	98.8422	56.5288		138		155.371	-0.272338	155.371	-0.272338
or	LL	1	2	1	7	35	Tue	LL	LR	59	28.7946	55.4293	28.7946	55.4293		139		84.2239	0.316237	84.2239	0.316237
or	LL	1	2	1	8	35	Tue	UR	LL	59	13.7019	27.4963	13.7019	27.4963		140		41.1982	0.33483	41.1982	0.33483
or	UL	1	2	1	5	36	Wed	UL	LR	60	34.8248	32.0887	34.4204	32.0887		141		66.9135	-0.0408911	66.5091	-0.0350595
or	LR	1	2	1	6	36	Wed	LR	UL	60	23.6475	32.5705	23.6475	32.5705		142		56.2181	0.158722	56.2181	0.158722
or	LL	1	2	1	7	36	Wed	LL	UR	60	44.9906	52.6181	44.9906	52.6181		143		97.6087	0.0781439	97.6087	0.0781439
or	LL	1	2	1	8	36	Wed	UR	UL	60	43.1622	66.9139	43.1622	66.9139		144		110.076	0.215775	110.076	0.215775
or	UL	1	2	1	5	37	Wed	UL	LL	61	65.2739	22.1187	65.2739	22.1187		145		87.3926	-0.493808	87.3926	-0.493808
or	LR	1	2	1	6	37	Wed	LR	LL	61	28.5077	112.3	28.5077	112.3		146		140.807	0.595082	140.807	0.595082
or	LL	1	2	1	7	37	Wed	LL	LR	61	56.2236	53.925	55.9406	53.925		147		110.149	-0.0208685	109.866	-0.0183468
or	LL	1	2	1	8	37	Wed	UR	LL	61	73.4045	97.4607	73.4045	97.4607		148		170.865	0.14079	170.865	0.14079
or	UL	1	2	1	5	38	Wed	UL	UR	2	61.1156	97.7419	61.1156	97.7419		149		158.858	0.230561	158.858	0.230561
or	LR	1	2	1	6	38	Wed	LR	LL	2	34.8639	40.5502	34.8639	40.1666		150		75.4141	0.0754003	75.0305	0.0706739
or	LL	1	2	1	7	38	Wed	LL	UL	2	40.6736	50.18	40.5901	50.18		151		90.8536	0.104634	90.77	0.105651
or	LL	1	2	1	8	38	Wed	UR	UL	2	52.462	57.6805	52.462	57.6805		152		110.143	0.0473799	110.143	0.0473799
or	UL	1	2	1	5	39	Wed	UL	LR	15	11.7008	31.2408	11.7008	31.2408		153		42.9416	0.455038	42.9416	0.455038
or	LR	1	2	1	6	39	Wed	LR	UR	15	47.5918	68.2617	47.5918	68.2617		154		115.853	0.178414	115.853	0.178414
or	LL	1	2	1	7	39	Wed	LL	UR	15	11.8994	33.6866	11.8994	33.6866		155		45.5861	0.477935	45.5861	0.477935
or	LL	1	2	1	8	39	Wed	UR	LR	15	31.6448	75.3049	31.6448	75.1202		156		106.95	0.408231	106.765	0.407207
or	UL	1	2	1	5	40	Wed	UL	UR	28	86.0726	82.5344	86.0726	82.5344		157		168.607	-0.0209853	168.607	-0.0209853
or	LR	1	2	1	6	40	Wed	LR	UL	28	74.4896	36.1488	74.4896	36.1488		158		110.638	-0.346542	110.638	-0.346542
or	LL	1	2	1	7	40	Wed	LL	LR	28	42.3684	111.306	42.3684	111.306		159		153.675	0.448597	153.675	0.448597
or	LL	1	2	1	8	40	Wed	UR	LL	28	60.0968	105.413	60.0968	105.413		160		165.51	0.273797	165.51	0.273797
or	UL	1	2	1	5	41	Thu	UL	LL	51	34.7009	28.7807	34.2122	28.7807		161		63.4816	-0.0932589	62.9929	-0.0862246
or	LR	1	2	1	6	41	Thu	LR	LL	51	35.2825	23.7749	35.2825	23.7749		162		59.0574	-0.194853	59.0574	-0.194853
or	LL	1	2	1	7	41	Thu	LL	UR	51	87.3491	37.61	87.3491	37.61		163		124.959	-0.398043	124.959	-0.398043
or	LL	1	2	1	8	41	Thu	UR	LL	51	27.5147	37.6523	27.5147	37.6523		164		65.167	0.155563	65.167	0.155563
or	UL	1	2	1	5	42	Thu	UL	LR	35	12.7935	20.5867	12.7935	20.5867		165		33.3802	0.233466	33.3802	0.233466
or	LR	1	2	1	6	42	Thu	LR	UL	35	51.7519	33.7388	51.7519	33.7388		166		85.4907	-0.210703	85.4907	-0.210703
or	LL	1	2	1	7	42	Thu	LL	LR	35	51.1174	44.0799	50.9339	44.0799		167		95.1973	-0.0739256	95.0138	-0.0721371
or	LL	1	2	1	8	42	Thu	UR	UL	35	23.4071	32.923	23.4071	32.6115		168		56.33	0.168932	56.0185	0.16431
or	UL	1	2	1	5	43	Thu	UL	LR	42	121.017	64.6382	121.017	64.2556		169		185.655	-0.303675	185.273	-0.306367
or	LR	1	2	1	6	43	Thu	LR	UR	42	116.709	66.0789	116.709	66.0789		170		182.788	-0.276989	182.788	-0.276989
or	LL	1	2	1	7	43	Thu	LL	LR	42	117.422	85.9562	117.422	85.5737		171		203.378	-0.154715	202.996	-0.156891
or	LL	1	2	1	8	43	Thu	UR	LR	42	87.6604	118.03	87.0772	118.03		172		205.691	0.147648	205.107	0.150912
or	UL	1	2	1	5	44	Thu	UL	UR	3	49.5719	45.0767	49.5719	45.0767		173		94.6486	-0.0474938	94.6486	-0.0474938
or	LR	1	2	1	6	44	Thu	LR	LL	3	31.4078	22.7762	31.4078	22.7762		174		54.184	-0.159302	54.184	-0.159302
or	LL	1	2	1	7	44	Thu	LL	UL	3	27.6907	22.7233	27.6907	22.7233		175		50.414	-0.098533	50.414	-0.098533
or	LL	1	2	1	8	44	Thu	UR	LL	3	41.3643	43.243	41.3643	43.243		176		84.6073	0.0222043	84.6073	0.0222043
or	UL	1	2	1	5	45	Thu	UL	UR	16	59.1952	63.8135	59.1952	63.8135		177		123.009	0.0375441	123.009	0.0375441
or	LR	1	2	1	6	45	Thu	LR	UL	16	63.0779	40.397	63.0779	40.1724		178		103.475	-0.219192	103.25	-0.221845
or	LL	1	2	1	7	45	Thu	LL	UR	16	31.6719	27.1876	31.5853	27.1876		179		58.8595	-0.0761854	58.7729	-0.0748242
or	LL	1	2	1	8	45	Thu	UR	UL	16	19.8874	63.1906	19.5037	63.1906		180		83.0781	0.521235	82.6943	0.528295
or	UL	1	2	1	5	46	Fri	UL	LR	29	29.1718	40.8342	29.1718	40.8342		181		70.006	0.166592	70.006	0.166592
or	LR	1	2	1	6	46	Fri	LR	LL	29	22.5887	28.3148	22.5887	28.3148		182		50.9035	0.112489	50.9035	0.112489
or	LL	1	2	1	7	46	Fri	LL	LR	29	18.5354	31.222	18.5354	31.222		183		49.7574	0.254968	49.7574	0.254968
or	LL	1	2	1	8	46	Fri	UR	LL	29	25.1894	65.3122	25.1894	65.3122		184		90.5015	0.443338	90.5015	0.443338
or	UL	1	2	1	5	47	Fri	UL	UR	52	45.585	53.9225	45.585	53.9225		185		99.5074	0.0837875	99.5074	0.0837875
or	LR	1	2	1	6	47	Fri	LR	UL	52	109.68	84.0601	109.68	84.0601		186		193.74	-0.132237	193.74	-0.132237
or	LL	1	2	1	7	47	Fri	LL	UR	52	66.3993	112.924	66.3993	112.924		187		179.324	0.259447	179.324	0.259447
or	LL	1	2	1	8	47	Fri	UR	LL	52	54.8533	95.7924	54.8533	95.7924		188		150.646	0.271757	150.646	0.271757
or	UL	1	2	1	5	48	Fri	UL	LR	36	73.0928	83.0237	73.0928	83.0237		189		156.116	0.0636124	156.116	0.0636124
or	LR	1	2	1	6	48	Fri	LR	LL	36	64.2438	146.444	64.2438	146.444		190		210.688	0.390152	210.688	0.390152
or	LL	1	2	1	7	48	Fri	LL	UR	36	111.982	119.321	111.982	119.321		191		231.303	0.0317297	231.303	0.0317297
or	LL	1	2	1	8	48	Fri	UR	UL	36	97.4083	101.214	97.4083	101.214		192		198.623	0.0191619	198.623	0.0191619
or	UL	1	2	1	5	49	Fri	UL	UR	43	81.8734	58.5023	81.8734	58.5023		193		140.376	-0.16649	140.376	-0.16649
or	LR	1	2	1	6	49	Fri	LR	UL	43	64.8357	56.8814	64.8357	56.8814		194		121.717	-0.065351	121.717	-0.065351
or	LL	1	2	1	7	49	Fri	LL	LR	43	50.3644	52.1697	50.3644	52.1697		195		102.534	0.0176062	102.534	0.0176062
or	LL	1	2	1	8	49	Fri	UR	UL	43	40.2237	63.7375	40.2237	63.7375		196		103.961	0.226178	103.961	0.226178
or	UL	1	2	1	5	50	Fri	UL	LL	4	146.506	110.729	146.506	110.145		197		257.234	-0.139083	256.651	-0.141672
or	LR	1	2	1	6	50	Fri	LR	UR	4	115.632	88.1152	115.632	88.1152		198		203.747	-0.135054	203.747	-0.135054
or	LL	1	2	1	7	50	Fri	LL	UL	4	81.9483	71.9364	81.9483	71.9364		199		153.885	-0.0650613	153.885	-0.0650613
or	LL	1	2	1	8	50	Fri	UR	LR	4	64.3944	82.4086	64.3944	82.4086		200		146.803	0.122709	146.803	0.122709
or	UL	1	3	1	5	51	Mon	UL	LL	13	65.6254	58.0824	65.6254	58.0824		201		123.708	-0.0609746	123.708	-0.0609746
or	LR	1	3	1	6	51	Mon	LR	UR	13	80.9383	69.8555	80.9383	69.8555		202		150.794	-0.0734967	150.794	-0.0734967
or	LL	1	3	1	7	51	Mon	LL	UL	13	48.5759	65.1375	48.5759	65.1375		203		113.713	0.145643	113.713	0.145643
or	LL	1	3	1	8	51	Mon	UR	LR	13	67.0045	81.1575	66.8256	81.1575		204		148.162	0.0955239	147.983	0.0968483
or	UL	1	3	1	5	52	Mon	UL	LR	14	109.292	57.6011	109.292	57.6011		205		166.893	-0.309725	166.893	-0.309725
or	LR	1	3	1	6	52	Mon	LR	LL	14	33.54	87.0688	33.54	87.0688		206		120.609	0.443822	120.609	0.443822
or	LL	1	3	1	7	52	Mon	LL	UR	14	57.0995	44.2168	57.0995	44.2168		207		101.316	-0.127153	101.316	-0.127153
or	LL	1	3	1	8	52	Mon	UR	UL	14	57.4219	60.9461	57.4219	60.9461		208		118.368	0.0297732	118.368	0.0297732
or	UL	1	3	1	5	53	Mon	UL	UR	23	38.1485	39.8906	38.1485	39.8906		209		78.0391	0.0223229	78.0391	0.0223229
or	LR	1	3	1	6	53	Mon	LR	UL	23	44.8241	38.084	44.8241	38.084		210		82.9081	-0.0812968	82.9081	-0.0812968
or	LL	1	3	1	7	53	Mon	LL	LR	23	20.3314	38.6593	20.3314	38.6593		211		58.9906	0.310692	58.9906	0.310692
or	LL	1	3	1	8	53	Mon	UR	LL	23	26.706	44.7193	26.706	44.7193		212		71.4253	0.252199	71.4253	0.252199
or	UL	1	3	1	5	54	Mon	UL	LR	40	61.59	72.527	61.59	72.527		213		134.117	0.081548	134.117	0.081548
or	LR	1	3	1	6	54	Mon	LR	UL	40	71.6746	58.9393	71.6746	58.5346		214		130.614	-0.0975034	130.209	-0.100914
or	LL	1	3	1	7	54	Mon	LL	UR	40	117.815	61.3468	117.815	61.3468		215		179.162	-0.315181	179.162	-0.315181
or	LL	1	3	1	8	54	Mon	UR	UL	40	62.8549	103.882	62.8549	103.369		216		166.737	0.246057	166.224	0.243731
or	UL	1	3	1	5	55	Mon	UL	UR	11	63.5221	96.6497	63.0381	96.6497		217		160.172	0.206825	159.688	0.210483
or	LR	1	3	1	6	55	Mon	LR	LL	11	52.8188	85.6377	52.8188	85.6377		218		138.456	0.237034	138.456	0.237034
or	LL	1	3	1	7	55	Mon	LL	LR	11	50.2	92.092	50.2	92.092		219		142.292	0.294409	142.292	0.294409
or	LL	1	3	1	8	55	Mon	UR	LL	11	67.5333	106.743	67.5333	106.743		220		174.277	0.224987	174.277	0.224987
or	UL	1	3	1	5	56	Tue	UL	UR	50	44.5636	38.3887	44.5636	38.3887		221		82.9523	-0.0744393	82.9523	-0.0744393
or	LR	1	3	1	6	56	Tue	LR	UL	50	67.08	78.2429	67.08	78.1143		222		145.323	0.0768147	145.194	0.0759971
or	LL	1	3	1	7	56	Tue	LL	LR	50	65.5617	40.9715	65.5617	40.9715		223		106.533	-0.230822	106.533	-0.230822
or	LL	1	3	1	8	56	Tue	UR	LL	50	32.5897	64.1296	32.5897	64.1296		224		96.7193	0.326098	96.7193	0.326098
or	UL	1	3	1	5	57	Tue	UL	LL	2	63.3606	94.4332	63.3606	94.4332		225		157.794	0.196919	157.794	0.196919
or	LR	1	3	1	6	57	Tue	LR	LL	2	55.5214	106.779	55.5214	106.375		226		162.3	0.315818	161.896	0.314111
or	LL	1	3	1	7	57	Tue	LL	LR	2	73.0376	103.411	73.0376	103.026		227		176.448	0.172136	176.064	0.170329
or	LL	1	3	1	8	57	Tue	UR	UL	2	59.9816	73.8426	59.9816	73.8426		228		133.824	0.103576	133.824	0.103576
or	UL	1	3	1	5	58	Tue	UL	LR	15	22.204	16.1849	22.204	16.1849		229		38.3889	-0.156794	38.3889	-0.156794
or	LR	1	3	1	6	58	Tue	LR	UR	15	39.302	37.9638	39.302	37.9638		230		77.2659	-0.0173193	77.2659	-0.0173193
or	LL	1	3	1	7	58	Tue	LL	UR	15	45.3814	17.745	45.3814	17.5213		231		63.1264	-0.437796	62.9027	-0.442907
or	LL	1	3	1	8	58	Tue	UR	LL	15	23.8242	25.3335	23.8242	25.3335		232		49.1577	0.0307021	49.1577	0.0307021
or	UL	1	3	1	5	59	Tue	UL	LR	24	22.0348	13.13	22.0348	13.13		233		35.1648	-0.253231	35.1648	-0.253231
or	LR	1	3	1	6	59	Tue	LR	LL	24	38.2508	47.8369	38.2508	47.8369		234		86.0877	0.111353	86.0877	0.111353
or	LL	1	3	1	7	59	Tue	LL	UL	24	28.5738	37.4739	28.5738	37.4739		235		66.0477	0.134753	66.0477	0.134753
or	LL	1	3	1	8	59	Tue	UR	UL	24	24.6252	51.3166	24.6252	51.3166		236		75.9419	0.351471	75.9419	0.351471
or	UL	1	3	1	5	60	Tue	UL	UR	41	34.7964	127.803	34.7964	127.803		237		162.599	0.571998	162.599	0.571998
or	LR	1	3	1	6	60	Tue	LR	UL	41	89.4091	76.4644	89.4091	76.4644		238		165.874	-0.0780397	165.874	-0.0780397
or	LL	1	3	1	7	60	Tue	LL	UR	41	58.1124	54.7381	58.1124	54.7381		239		112.851	-0.0299007	112.851	-0.0299007
or	LL	1	3	1	8	60	Tue	UR	LR	41	49.9006	76.8975	49.9006	76.8975		240		126.798	0.212912	126.798	0.212912
or	UL	1	3	1	5	61	Wed	UL	LL	12	75.9467	27.5502	75.9467	27.5502		241		103.497	-0.467613	103.497	-0.467613
or	LR	1	3	1	6	61	Wed	LR	LL	12	21.8606	24.291	21.8606	24.291		242		46.1515	0.0526615	46.1515	0.0526615
or	LL	1	3	1	7	61	Wed	LL	UR	12						243
or	LL	1	3	1	8	61	Wed	UR	LR	12	35.7894	38.6716	35.7894	38.6716		244		74.461	0.0387065	74.461	0.0387065
or	UL	1	3	1	5	62	Wed	UL	LR	51	49.5561	72.3323	49.5561	72.3323		245		121.888	0.186862	121.888	0.186862
or	LR	1	3	1	6	62	Wed	LR	UR	51	45.2661	36.4697	45.2661	36.4697		246		81.7358	-0.10762	81.7358	-0.10762
or	LL	1	3	1	7	62	Wed	LL	UL	51	46.4456	35.6309	46.4456	35.6309		247		82.0765	-0.131764	82.0765	-0.131764
or	LL	1	3	1	8	62	Wed	UR	UL	51	45.1954	60.8583	45.1954	60.8583		248		106.054	0.147688	106.054	0.147688
or	UL	1	3	1	5	63	Wed	UL	UR	3	29.6583	23.68	29.6583	23.68		249		53.3383	-0.112081	53.3383	-0.112081
or	LR	1	3	1	6	63	Wed	LR	UL	3	18.7046	24.958	18.7046	24.958		250		43.6625	0.143221	43.6625	0.143221
or	LL	1	3	1	7	63	Wed	LL	LR	3	23.6309	38.5791	23.6309	38.5791		251		62.2099	0.240287	62.2099	0.240287
or	LL	1	3	1	8	63	Wed	UR	LL	3	22.809	49.8257	22.809	49.8257		252		72.6347	0.371953	72.6347	0.371953
or	UL	1	3	1	5	64	Wed	UL	UR	16	86.7629	76.2827	86.3544	76.2827		253		163.046	-0.0642779	162.637	-0.0619276
or	LR	1	3	1	6	64	Wed	LR	UL	16	69.5639	89.527	69.5639	89.527		254		159.091	0.125483	159.091	0.125483
or	LL	1	3	1	7	64	Wed	LL	UR	16	92.4997	80.8919	92.4997	80.8919		255		173.392	-0.0669455	173.392	-0.0669455
or	LL	1	3	1	8	64	Wed	UR	LL	16	106.266	78.9021	106.266	78.9021		256		185.168	-0.147779	185.168	-0.147779
or	UL	1	3	1	5	65	Wed	UL	LR	25	25.3435	27.1058	25.3435	27.1058		257		52.4492	0.0335997	52.4492	0.0335997
or	LR	1	3	1	6	65	Wed	LR	LL	25	57.1061	46.3933	57.1061	46.3933		258		103.499	-0.103506	103.499	-0.103506
or	LL	1	3	1	7	65	Wed	LL	LR	25	38.9024	40.6967	38.9024	40.1089		259		79.599	0.022542	79.0112	0.0152705
or	LL	1	3	1	8	65	Wed	UR	UL	25						260
or	UL	1	3	1	5	66	Thu	UL	UR	42	84.8349	100.36	84.8349	100.36		261		185.195	0.083833	185.195	0.083833
or	LR	1	3	1	6	66	Thu	LR	UL	42	79.2726	77.0864	79.092	77.0864		262		156.359	-0.0139822	156.178	-0.0128416
or	LL	1	3	1	7	66	Thu	LL	UL	42	65.6329	58.6495	65.6329	58.6495		263		124.282	-0.0561895	124.282	-0.0561895
or	LL	1	3	1	8	66	Thu	UR	LL	42	50.6487	106.154	50.6487	106.154		264		156.803	0.353983	156.803	0.353983
or	UL	1	3	1	5	67	Thu	UL	LR	33	145.995	16.7944	145.995	16.7944		265		162.789	-0.793667	162.789	-0.793667
or	LR	1	3	1	6	67	Thu	LR	LL	33	37.5624	89.2189	37.5624	89.2189		266		126.781	0.407445	126.781	0.407445
or	LL	1	3	1	7	67	Thu	LL	LR	33	60.8429	44.034	60.8429	44.034		267		104.877	-0.160273	104.877	-0.160273
or	LL	1	3	1	8	67	Thu	UR	LR	33	83.7292	75.1014	83.7292	75.1014		268		158.831	-0.054321	158.831	-0.054321
or	UL	1	3	1	5	68	Thu	UL	LL	52	39.3319	72.1342	39.3319	72.1342		269		111.466	0.29428	111.466	0.29428
or	LR	1	3	1	6	68	Thu	LR	UL	52	68.7034	69.7487	68.7034	69.7487		270		138.452	0.00754954	138.452	0.00754954
or	LL	1	3	1	7	68	Thu	LL	LR	52	24.7712	8.19964	24.7712	8.19964		271		32.9708	-0.502613	32.9708	-0.502613
or	LL	1	3	1	8	68	Thu	UR	UL	52						272
or	UL	1	3	1	5	69	Thu	UL	LR	4	60.6654	38.7535	60.6654	38.7535		273		99.4189	-0.2204	99.4189	-0.2204
or	LR	1	3	1	6	69	Thu	LR	UR	4	40.7146	27.1547	40.7146	27.1547		274		67.8693	-0.199795	67.8693	-0.199795
or	LL	1	3	1	7	69	Thu	LL	UR	4	64.6844	25.9114	64.6844	25.9114		275		90.5958	-0.427977	90.5958	-0.427977
or	LL	1	3	1	8	69	Thu	UR	UL	4	84.704	64.4566	84.704	64.4566		276		149.161	-0.135742	149.161	-0.135742
or	UL	1	3	1	5	70	Thu	UL	UR	17	72.7487	70.5355	72.7487	70.5355		277		143.284	-0.0154464	143.284	-0.0154464
or	LR	1	3	1	6	70	Thu	LR	LL	17	66.5119	119.565	66.5119	119.565		278		186.077	0.285114	186.077	0.285114
or	LL	1	3	1	7	70	Thu	LL	UR	17	47.8317	59.8878	47.8317	59.8878		279		107.719	0.111921	107.719	0.111921
or	LL	1	3	1	8	70	Thu	UR	LL	17	32.676	92.3774	32.676	92.3774		280		125.053	0.477407	125.053	0.477407
or	UL	1	3	1	5	71	Fri	UL	LR	26	9.97461	15.9239	9.97461	15.9239		281		25.8985	0.229715	25.8985	0.229715
or	LR	1	3	1	6	71	Fri	LR	LL	26	58.1329	37.3548	58.1329	37.3548		282		95.4878	-0.2176	95.4878	-0.2176
or	LL	1	3	1	7	71	Fri	LL	LR	26	14.6262	15.386	14.6262	15.386		283		30.0122	0.0253155	30.0122	0.0253155
or	LL	1	3	1	8	71	Fri	UR	UL	26	28.5231	40.2307	28.5231	40.2307		284		68.7538	0.170283	68.7538	0.170283
or	UL	1	3	1	5	72	Fri	UL	UR	43	27.9558	29.6305	27.9558	29.6305		285		57.5863	0.0290827	57.5863	0.0290827
or	LR	1	3	1	6	72	Fri	LR	UL	43	39.3185	50.2067	39.3185	50.2067		286		89.5253	0.121622	89.5253	0.121622
or	LL	1	3	1	7	72	Fri	LL	UR	43	22.5749	27.3905	22.5749	27.3905		287		49.9654	0.0963773	49.9654	0.0963773
or	LL	1	3	1	8	72	Fri	UR	LL	43	28.5625	62.803	28.5625	62.803		288		91.3655	0.374764	91.3655	0.374764
or	UL	1	3	1	5	73	Fri	UL	UR	34	14.4802	22.1157	14.4802	22.1157		289		36.5959	0.208643	36.5959	0.208643
or	LR	1	3	1	6	73	Fri	LR	LL	34	36.171	52.7348	36.171	52.3237		290		88.9057	0.186307	88.4947	0.182528
or	LL	1	3	1	7	73	Fri	LL	LR	34	25.8171	47.569	25.8171	47.569		291		73.3862	0.296403	73.3862	0.296403
or	LL	1	3	1	8	73	Fri	UR	LL	34	27.0799	46.7903	23.9873	46.7903		292		73.8702	0.266824	70.7776	0.322178
or	UL	1	3	1	5	74	Fri	UL	LR	53	52.2941	26.953	52.2941	26.953		293		79.2471	-0.319774	79.2471	-0.319774
or	LR	1	3	1	6	74	Fri	LR	UL	53	53.7774	94.3266	53.3742	94.3266		294		148.104	0.273789	147.701	0.277266
or	LL	1	3	1	7	74	Fri	LL	UR	53	59.7015	42.5617	59.7015	42.5617		295		102.263	-0.167605	102.263	-0.167605
or	LL	1	3	1	8	74	Fri	UR	UL	53	62.923	67.0813	62.7027	67.0813		296		130.004	0.0319859	129.784	0.0337375
or	UL	1	3	1	5	75	Fri	UL	LL	5	83.6819	173.286	83.1981	173.286		297		256.968	0.348697	256.484	0.351241
or	LR	1	3	1	6	75	Fri	LR	UR	5	138.777	106.937	138.493	106.937		298		245.714	-0.129582	245.43	-0.128574
or	LL	1	3	1	7	75	Fri	LL	UL	5	58.7577	165.675	58.7577	162.189		299		224.432	0.476388	220.947	0.468128
or	LL	1	3	1	8	75	Fri	UR	LR	5	132.884	120.569	132.884	120.338		300		253.453	-0.0485882	253.221	-0.0495452
or	UL	1	4	1	5	76	Wed	UL	LL	50	53.4927	62.395	53.409	62.395		301		115.888	0.0768186	115.804	0.0775972
or	LR	1	4	1	6	76	Wed	LR	UR	50	54.4228	68.9377	54.4228	68.9377		302		123.36	0.117662	123.36	0.117662
or	LL	1	4	1	7	76	Wed	LL	UL	50	26.2779	37.9782	26.2779	37.9782		303		64.2561	0.182088	64.2561	0.182088
or	LL	1	4	1	8	76	Wed	UR	LR	50	48.3196	71.2675	48.3196	71.2675		304		119.587	0.191893	119.587	0.191893
or	UL	1	4	1	5	77	Wed	UL	LR	17	53.4557	55.7045	53.4557	55.7045		305		109.16	0.0206012	109.16	0.0206012
or	LR	1	4	1	6	77	Wed	LR	UL	17	27.7934	70.8222	27.7934	70.8222		306		98.6156	0.436329	98.6156	0.436329
or	LL	1	4	1	7	77	Wed	LL	UR	17	54.8875	69.6019	54.8875	69.6019		307		124.489	0.118199	124.489	0.118199
or	LL	1	4	1	8	77	Wed	UR	UL	17	76.3921	82.17	76.3921	82.17		308		158.562	0.0364394	158.562	0.0364394
or	UL	1	4	1	5	78	Wed	UL	UR	30	55.9024	51.7392	55.7739	51.7392		309		107.642	-0.0386758	107.513	-0.0375275
or	LR	1	4	1	6	78	Wed	LR	LL	30	33.2067	56.2559	33.2067	56.2559		310		89.4626	0.257641	89.4626	0.257641
or	LL	1	4	1	7	78	Wed	LL	LR	30	51.0191	85.2952	50.6226	85.2952		311		136.314	0.251449	135.918	0.2551
or	LL	1	4	1	8	78	Wed	UR	LL	30	49.5049	94.5263	49.5049	94.5263		312		144.031	0.31258	144.031	0.31258
or	UL	1	4	1	5	79	Wed	UL	LR	53	50.5904	52.1986	50.5904	52.1986		313		102.789	0.0156453	102.789	0.0156453
or	LR	1	4	1	6	79	Wed	LR	UL	53	55.2677	45.0909	55.2677	45.0909		314		100.359	-0.101404	100.359	-0.101404
or	LL	1	4	1	7	79	Wed	LL	UR	53	97.5493	43.3674	97.3125	43.3674		315		140.917	-0.384496	140.68	-0.38346
or	LL	1	4	1	8	79	Wed	UR	LL	53	57.0449	112.657	57.0449	112.657		316		169.702	0.327703	169.702	0.327703
or	UL	1	4	1	5	80	Wed	UL	UR	37	88.0767	108.148	88.0767	108.148		317		196.224	0.102286	196.224	0.102286
or	LR	1	4	1	6	80	Wed	LR	LL	37	62.0939	106.824	62.0939	106.824		318		168.918	0.264805	168.918	0.264805
or	LL	1	4	1	7	80	Wed	LL	LR	37	113.574	134.1	113.574	134.1		319		247.674	0.082878	247.674	0.082878
or	LL	1	4	1	8	80	Wed	UR	UL	37	76.4662	68.2951	76.4662	68.2951		320		144.761	-0.0564453	144.761	-0.0564453
or	UL	1	4	1	5	81	Thu	LR	LL	44	172.537	311.292	49.5026	72.632		321		483.829	0.286786	122.135	0.189376
or	LR	1	4	1	6	81	Thu	UL	UR	44	166.777	124.601	42.0971	21.5888		322		291.378	-0.144748	63.6859	-0.322024
or	LL	1	4	1	7	81	Thu	UR	UL	44	130.188	228.272	34.617	65.2818		323		358.46	0.273624	99.8988	0.306958
or	LL	1	4	1	8	81	Thu	LL	LR	44	387.556	262.685	63.9963	64.7961		324		650.241	-0.192037	128.792	0.00620992
or	UL	1	4	1	5	82	Fri	UL	LL	27	73.2041	66.3931	28.2204	36.4966		325		139.597	-0.0487906	64.717	0.127883
or	LR	1	4	1	6	82	Fri	LR	UR	27	115.682	49.1924	60.7892	22.9962		326		164.874	-0.403273	83.7854	-0.451069
or	LL	1	4	1	7	82	Fri	LL	UL	27	110.134	111.3	57.5966	63.3283		327		221.434	0.00526742	120.925	0.0473996
or	LL	1	4	1	8	82	Fri	UR	LR	27	115.727	78.1347	88.64	41.962		328		193.862	-0.193914	130.602	-0.357406
